# Supplementary material for: Fruitless decommissions regulatory elements to implement cell-type-specific neuronal masculinization
Source: PLoS Genet. 2021 Feb 18;17(2):e1009338. doi: 10.1371/journal.pgen.1009338 (PMC7924761; doi:10.1371/journal.pgen.1009338)
Supplement: S4 Table — Statistical results of each comparison are shown in separate sheets. Tables display peak location and statistical comparisons, annotation of peak location, and data on nearest gene. (XLSX) [file pgen.1009338.s011.xlsx]

## Sheet: femfruplus vs malefruplus
seqnames	start	end	width	Conc	Conc_FemFruPlus	Conc_MaleFruPlus	Fold	p.value	FDR	logFDR	annotation	geneChr	geneStart	geneEnd	geneLength	geneStrand	geneId	distanceToTSS	ENTREZID	SYMBOL	GENENAME	GeneID
chr2L	17584868	17585361	494	7.95	8.63	6.62	2.01	3.82e-23	1.77e-19	18.752	Promoter	1	17584725	17585095	371	2	FBgn0266587	0	NA	NA	NA	lncRNA:CR45112
chr3R	26859087	26860039	953	8.82	9.37	7.92	1.45	2.87e-21	8.86e-18	17.0526	Intron (FBtr0334310/FBgn0051072, intron 9 of 17)	4	26842462	26863130	20669	2	FBgn0051072	3091	43223	Lerp	lysosomal enzyme receptor protein	Lerp
chr2R	14071615	14072348	734	7.62	8.29	6.33	1.96	3.07e-18	7.11e-15	14.1481	Intron (FBtr0339764/FBgn0040752, intron 3 of 10)	2	14060456	14140902	80447	2	FBgn0040752	68554	50225	Prosap	prosap	Prosap
chrX	2323760	2324249	490	8.13	8.74	7.05	1.7	6.53e-16	2.24e-13	12.6498	Intron (FBtr0344007/FBgn0003079, intron 2 of 6)	6	2295466	2343870	48405	1	FBgn0003079	28294	31221	Raf	Raf oncogene	Raf
chr3L	11358751	11359141	391	7.62	8.23	6.53	1.71	6.35e-15	9.8e-12	11.0088	Downstream (2-3kb)	3	11364683	11365897	1215	1	FBgn0266396	-5542	NA	NA	NA	lncRNA:CR45036
chr3R	13525359	13526093	735	7.48	6.31	8.11	-1.81	5.59e-15	9.8e-12	11.0088	Downstream (2-3kb)	4	13522951	13523535	585	2	FBgn0038157	-1824	41658	CG12538	uncharacterized protein	CG12538
chr3R	19751055	19752302	1248	8.46	7.69	8.97	-1.28	5.93e-14	6.86e-11	10.1637	Intron (FBtr0301378/FBgn0024963, intron 1 of 7)	4	19730715	19775231	44517	1	FBgn0024963	20340	42350	GluClalpha	GluClalpha	GluClalpha
chr2L	180958	181749	792	9.43	9.87	8.79	1.08	2.03e-13	2.09e-10	9.67985	Intron (FBtr0078122/FBgn0016977, intron 2 of 11)	1	159032	203397	44366	1	FBgn0016977	21926	44205	spen	split ends	spen
chr3R	22310331	22311543	1213	8.67	8	9.13	-1.13	4.76e-13	4.01e-10	9.39686	3' UTR	4	22308663	22324094	15432	2	FBgn0263117	12551	42608	CG34377	uncharacterized protein	CG34377
chr2R	18374777	18375478	702	8.24	8.75	7.45	1.3	1.54e-12	1.19e-09	8.92445	Distal Intergenic	2	18377487	18378196	710	1	FBgn0261700	-2009	NA	NA	NA	lncRNA:CR42736
chr3R	22305959	22306705	747	6.75	7.43	5.44	1.99	3.62e-12	2.57e-09	8.59007	Downstream (1-2kb)	4	22298805	22304420	5616	1	FBgn0038938	7154	42606	CG7084	uncharacterized protein	CG7084
chr3R	27770195	27770745	551	6.95	5.7	7.61	-1.91	6.42e-12	4.25e-09	8.37161	Intron (FBtr0305292/FBgn0085382, intron 11 of 11)	4	27767966	27905843	137878	2	FBgn0085382	135098	5740590	CG34353	uncharacterized protein	CG34353
chrX	18035396	18036283	888	7.54	8.12	6.54	1.59	2.03e-11	4.82e-09	8.31695	Intron (FBtr0089661/FBgn0003380, intron 3 of 13)	6	17924307	18063247	138941	2	FBgn0003380	26964	32780	Sh	Shaker	Sh
chr3L	22434613	22435452	840	8.16	7.36	8.68	-1.32	1.85e-11	1.07e-08	7.97062	Distal Intergenic	3	22424469	22424909	441	2	FBgn0267628	-9704	NA	NA	NA	lncRNA:CR45966
chr3L	10015574	10016729	1156	7.98	7.13	8.51	-1.38	2.15e-11	1.1e-08	7.95861	Intron (FBtr0076353/FBgn0040823, intron 2 of 5)	3	9974651	10139360	164710	1	FBgn0040823	40923	50296	dpr6	defective proboscis extension response 6	dpr6
chr2L	12910688	12911689	1002	7.88	8.42	7.03	1.38	2.49e-11	1.19e-08	7.92445	Distal Intergenic	1	12912530	12916774	4245	1	FBgn0040508	-841	34689	ACXC	Adenylyl cyclase X C	ACXC
chr3R	21935284	21936135	852	8.76	8.16	9.19	-1.04	2.6e-11	1.19e-08	7.92445	Distal Intergenic	4	21949114	22014539	65426	1	FBgn0264490	-12979	44936	Eip93F	Ecdysone-induced protein 93F	Eip93F
chr2L	12891298	12892241	944	7.57	8.12	6.68	1.44	2.86e-11	1.2e-08	7.92082	Distal Intergenic	1	12912530	12916774	4245	1	FBgn0040508	-20289	34689	ACXC	Adenylyl cyclase X C	ACXC
chr3L	14682646	14683254	609	7.05	7.68	5.88	1.81	5.23e-11	1.98e-08	7.70333	Intron (FBtr0299649/FBgn0259175, intron 2 of 9)	3	14672839	14747868	75030	1	FBgn0259175	9807	44297	ome	omega	ome
chr2L	4300135	4300511	377	6.32	4.76	7.06	-2.29	5.34e-11	1.98e-08	7.70333	Intron (FBtr0089268/FBgn0010473, intron 4 of 6)	1	4283148	4323781	40634	1	FBgn0010473	16987	46015	tutl	turtle	tutl
chrX	9841909	9842910	1002	7.58	8.11	6.72	1.39	1.11e-10	2.5e-08	7.60206	Intron (FBtr0346170/FBgn0052698, intron 5 of 8)	6	9783223	9855449	72227	1	FBgn0052698	58686	31915	CARPB	Carbonic anhydrase-related protein B	CARPB
chr2R	17944917	17945639	723	6.6	5.29	7.28	-1.98	1.15e-10	3.93e-08	7.40561	Distal Intergenic	2	17954545	17955295	751	1	FBgn0265591	-8906	NA	NA	NA	lncRNA:CR44418
chr3R	28575343	28576136	794	7.1	5.95	7.73	-1.78	2.19e-10	7.24e-08	7.14026	Distal Intergenic	4	28580976	28585264	4289	2	FBgn0000659	9128	43383	fkh	fork head	fkh
chr2L	17921039	17922122	1084	7.91	8.4	7.17	1.24	5.38e-10	1.56e-07	6.80688	Distal Intergenic	1	17918552	17919131	580	2	FBgn0262963	-1908	NA	NA	NA	lncRNA:CR43274
chrX	14592627	14593047	421	8.24	7.46	8.74	-1.29	8.71e-10	1.72e-07	6.76447	Intron (FBtr0073943/FBgn0030574, intron 1 of 8)	6	14584733	14602580	17848	2	FBgn0030574	9533	32397	sbm	sobremesa	sbm
chr3L	16533721	16534385	665	7.4	6.48	7.96	-1.48	8.69e-10	2.44e-07	6.61261	Intron (FBtr0307367/FBgn0263131, intron 2 of 30)	3	16491838	16543370	51533	2	FBgn0263131	8985	39835	CG43373	uncharacterized protein	CG43373
chr2L	10654677	10655557	881	7.3	6.4	7.85	-1.45	1.53e-09	4.06e-07	6.39147	Distal Intergenic	1	10657627	10658031	405	1	FBgn0267256	-2070	NA	NA	NA	lncRNA:CR45692
chr2R	15705341	15706027	687	6.92	7.52	5.89	1.63	1.61e-09	4.13e-07	6.38405	Distal Intergenic	2	15698726	15701696	2971	2	FBgn0286939	-3645	NA	NA	NA	NA
chr3R	17710693	17711666	974	9.51	9.95	8.89	1.06	1.92e-09	4.74e-07	6.32422	Intron (FBtr0089581/FBgn0261885, intron 2 of 15)	4	17687818	17718350	30533	2	FBgn0261885	6684	42130	osa	osa	osa
chr3R	7387681	7388434	754	6.98	5.88	7.6	-1.73	1.95e-09	4.74e-07	6.32422	Exon (FBtr0346216/FBgn0267120, exon 1 of 1)	4	7387444	7388319	876	1	FBgn0267120	237	NA	NA	NA	lncRNA:CR45560
chr3L	10109694	10110426	733	7.52	8.03	6.72	1.31	2.36e-09	5.46e-07	6.26281	Intron (FBtr0332665/FBgn0040823, intron 6 of 6)	3	9974651	10139360	164710	1	FBgn0040823	135043	50296	dpr6	defective proboscis extension response 6	dpr6
chr2R	20801026	20801617	592	7.37	7.91	6.51	1.41	2.43e-09	5.48e-07	6.26122	Distal Intergenic	2	20792982	20793795	814	1	FBgn0034551	8044	37354	CG15225	uncharacterized protein	CG15225
chr3R	22859808	22860709	902	8.22	7.59	8.65	-1.06	4.25e-09	9.14e-07	6.03905	Distal Intergenic	4	22851088	22851804	717	2	FBgn0264428	-8004	NA	NA	NA	lncRNA:CR43846
chr2R	23337771	23338413	643	7	5.99	7.6	-1.61	5.16e-09	1.08e-06	5.96658	Distal Intergenic	2	23329543	23330068	526	2	FBgn0050413	-7703	246601	CG30413	uncharacterized protein	CG30413
chr3R	27456545	27456983	439	6.73	5.66	7.34	-1.67	6.26e-09	1.29e-06	5.88941	Distal Intergenic	4	27464189	27467080	2892	1	FBgn0039518	-7206	43303	CG13978	uncharacterized protein	CG13978
chr2R	10696369	10696828	460	7.14	7.69	6.25	1.44	7.38e-09	1.39e-06	5.85699	Intron (FBtr0304900/FBgn0024836, intron 2 of 5)	2	10673345	10721138	47794	1	FBgn0024836	23024	36125	stan	starry night	stan
chr3R	27569352	27570342	991	8.49	7.94	8.88	-0.94	7.16e-09	1.39e-06	5.85699	Intron (FBtr0085208/FBgn0027492, intron 1 of 8)	4	27561675	27582241	20567	2	FBgn0027492	11899	43312	wdb	widerborst	wdb
chr2L	12769037	12769739	703	8.06	7.38	8.52	-1.14	7.31e-09	1.39e-06	5.85699	Distal Intergenic	1	12767717	12768765	1049	2	FBgn0267925	-272	NA	NA	NA	lncRNA:CR46206
chrX	2855061	2855600	540	7.24	6.36	7.79	-1.43	1.01e-08	1.69e-06	5.77211	Intron (FBtr0309500/FBgn0028369, intron 2 of 10)	6	2740384	3134532	394149	1	FBgn0028369	114677	31292	kirre	kin of irre	kirre
chr3R	28411648	28412102	455	6.04	4.63	6.73	-2.1	1.17e-08	2.17e-06	5.66354	Distal Intergenic	4	28418208	28474814	56607	1	FBgn0039584	-6106	43377	beat-VI	beaten path VI	beat-VI
chr2L	2925128	2925713	586	7.23	7.75	6.39	1.37	1.49e-08	2.64e-06	5.5784	5' UTR	1	2885929	2954406	68478	1	FBgn0041111	39199	33496	lilli	lilliputian	lilli
chr3L	21748524	21749270	747	8.28	7.67	8.71	-1.04	1.73e-08	2.96e-06	5.52871	Intron (FBtr0078450/FBgn0037130, intron 3 of 7)	3	21745359	21770534	25176	2	FBgn0037130	21264	40424	Syn1	Syntrophin-like 1	Syn1
chr3R	9905759	9906432	674	7.81	7.1	8.28	-1.18	1.71e-08	2.96e-06	5.52871	Intron (FBtr0114581/FBgn0267336, intron 1 of 2)	4	9874681	9995364	120684	1	FBgn0267336	31078	41217	Glut4EF	Glucose transporter 4 enhancer factor	Glut4EF
chr3R	19714014	19714663	650	6.93	7.5	6	1.5	1.9e-08	3.19e-06	5.49621	Downstream (<1kb)	4	19715186	19715927	742	2	FBgn0085315	1264	5740178	CG34286	uncharacterized protein	CG34286
chrX	6338733	6339863	1131	8.72	9.1	8.21	0.89	2.31e-08	3.62e-06	5.44129	5' UTR	6	6337762	6343731	5970	1	FBgn0029866	971	31576	CG3842	uncharacterized protein	CG3842
chrX	11239465	11240451	987	8	8.44	7.38	1.05	2.71e-08	4.17e-06	5.37986	Intron (FBtr0340338/FBgn0265595, intron 3 of 6)	6	11219379	11302783	83405	2	FBgn0265595	62332	32063	CG44422	uncharacterized protein	CG44422
chr3R	5696249	5696783	535	7.96	8.43	7.28	1.14	3.74e-08	6.07e-06	5.21681	Intron (FBtr0302091/FBgn0261261, intron 2 of 9)	4	5685855	5712837	26983	1	FBgn0261261	10394	40704	plx	pollux	plx
chr2L	3246137	3246683	547	7.28	7.81	6.43	1.37	4e-08	6.2e-06	5.20761	Distal Intergenic	1	3260973	3261281	309	2	FBgn0266876	14598	NA	NA	NA	lncRNA:CR45337
chr2R	19780565	19780946	382	7.13	7.65	6.3	1.36	3.92e-08	6.2e-06	5.20761	Downstream (2-3kb)	2	19783484	19784043	560	2	FBgn0034474	3097	37270	Obp56g	Odorant-binding protein 56g	Obp56g
chr3R	19204186	19205218	1033	8.02	8.45	7.4	1.05	4.09e-08	6.2e-06	5.20761	Distal Intergenic	4	19212154	19215442	3289	1	FBgn0025680	-6936	42305	cry	cryptochrome	cry
chr2R	7625509	7626416	908	6.91	5.92	7.5	-1.58	4.04e-08	6.2e-06	5.20761	Intron (FBtr0306933/FBgn0263077, intron 1 of 10)	2	7623242	7651787	28546	1	FBgn0263077	2267	35698	CG43340	uncharacterized protein	CG43340
chr2L	16941057	16941901	845	7.5	6.69	8.01	-1.32	4.93e-08	7.13e-06	5.14691	Downstream (2-3kb)	1	16944723	16945374	652	2	FBgn0262355	3473	NA	NA	NA	lncRNA:CR43053
chr2L	4428228	4428568	341	7.22	6.38	7.75	-1.37	5.66e-08	7.94e-06	5.10018	Intron (FBtr0331436/FBgn0031602, intron 1 of 3)	1	4403992	4441282	37291	2	FBgn0031602	12714	33646	CG15431	uncharacterized protein	CG15431
chr3L	5635186	5635990	805	8.42	8.8	7.9	0.91	5.79e-08	8e-06	5.09691	Intron (FBtr0077089/FBgn0035625, intron 1 of 4)	3	5630983	5652094	21112	1	FBgn0035625	4203	38638	Blimp-1	Blimp-1	Blimp-1
chr3L	19150894	19151413	520	7.45	7.96	6.65	1.3	6.82e-08	9.12e-06	5.04001	Intron (FBtr0332735/FBgn0016797, intron 2 of 2)	3	19140975	19235373	94399	2	FBgn0016797	83960	40090	fz2	frizzled 2	fz2
chr3L	17766998	17768020	1023	7.91	7.28	8.35	-1.06	6.73e-08	9.12e-06	5.04001	Distal Intergenic	3	17754936	17764158	9223	2	FBgn0043025	-2840	64879	Adgf-A2	Adenosine deaminase-related growth factor A2	Adgf-A2
chr2L	16017318	16017707	390	6.65	5.63	7.24	-1.6	7.18e-08	9.22e-06	5.03527	Intron (FBtr0343726/FBgn0028644, intron 2 of 7)	1	16000291	16041703	41413	1	FBgn0028644	17027	34945	beat-Ic	beaten path Ic	beat-Ic
chr2L	3236260	3236871	612	6.61	5.57	7.21	-1.64	7.11e-08	9.22e-06	5.03527	Distal Intergenic	1	3260973	3261281	309	2	FBgn0266876	24410	NA	NA	NA	lncRNA:CR45337
chrX	1250118	1250694	577	7.38	6.65	7.86	-1.21	7.24e-08	1.08e-05	4.96658	Intron (FBtr0070244/FBgn0028550, intron 4 of 4)	6	1242740	1275284	32545	2	FBgn0028550	24590	43867	Atf3	Activating transcription factor 3	Atf3
chr3L	18651791	18652171	381	6.57	7.16	5.57	1.59	9.94e-08	1.24e-05	4.90658	Intron (FBtr0075049/FBgn0036801, intron 2 of 8)	3	18625959	18667177	41219	1	FBgn0036801	25832	40032	MYPT-75D	MYPT-75D	MYPT-75D
chrX	12184163	12184895	733	7.91	8.36	7.26	1.09	8.97e-08	1.3e-05	4.88606	Intron (FBtr0346335/FBgn0267001, intron 3 of 19)	6	12043698	12335214	291517	1	FBgn0267001	140465	32183	Ten-a	Tenascin accessory	Ten-a
chr2L	19266942	19267518	577	6.22	4.99	6.88	-1.89	1.19e-07	1.45e-05	4.83863	Downstream (1-2kb)	1	19262470	19263057	588	1	FBgn0265080	4472	NA	NA	NA	lncRNA:CR44191
chr3R	12831425	12831900	476	7.25	7.78	6.42	1.36	1.39e-07	1.68e-05	4.77469	Downstream (2-3kb)	4	12833127	12833725	599	1	FBgn0267937	-1227	NA	NA	NA	lncRNA:CR46217
chr3L	10161879	10162451	573	6.35	5.07	7.01	-1.94	1.42e-07	1.69e-05	4.77211	Intron (FBtr0076308/FBgn0052057, intron 2 of 7)	3	10147454	10186108	38655	2	FBgn0052057	23657	39180	dpr10	defective proboscis extension response 10	dpr10
chr2R	17302540	17303123	584	7.62	6.94	8.08	-1.13	1.86e-07	2.1e-05	4.67778	Intron (FBtr0310346/FBgn0265487, intron 3 of 9)	2	17216549	17379376	162828	1	FBgn0265487	85991	36945	mbl	muscleblind	mbl
chr2L	12987166	12987535	370	6.97	6.13	7.5	-1.37	2.2e-07	2.45e-05	4.61083	Distal Intergenic	1	12978786	12981293	2508	1	FBgn0032464	8380	34695	Vha68-3	Vacuolar H[+] ATPase 68kD subunit 3	Vha68-3
chr2L	18228975	18230258	1284	9.24	8.81	9.56	-0.75	2.34e-07	2.54e-05	4.59517	Intron (FBtr0343817/FBgn0261804, intron 3 of 15)	1	18159811	18275770	115960	2	FBgn0261804	45512	35090	CG42750	uncharacterized protein	CG42750
chr2R	24226330	24226670	341	7.26	7.74	6.52	1.22	2.53e-07	2.69e-05	4.57025	Intron (FBtr0072275/FBgn0050419, intron 1 of 1)	2	24212491	24229795	17305	2	FBgn0050419	3125	37879	CG30419	uncharacterized protein	CG30419
chr3R	26739927	26740880	954	7.72	8.16	7.09	1.07	2.57e-07	2.71e-05	4.56703	Distal Intergenic	4	26737610	26738593	984	1	FBgn0039454	2317	43221	CG14247	uncharacterized protein	CG14247
chr3L	9117818	9119064	1247	8.7	9.06	8.22	0.83	2.72e-07	2.83e-05	4.54821	Intron (FBtr0331858/FBgn0011206, intron 1 of 7)	3	9097629	9134405	36777	2	FBgn0011206	15341	39049	bol	boule	bol
chr3R	8913824	8915081	1258	8.12	8.51	7.58	0.93	2.85e-07	2.93e-05	4.53313	Intron (FBtr0305301/FBgn0262614, intron 1 of 13)	4	8827068	8931896	104829	2	FBgn0262614	16815	41062	pyd	polychaetoid	pyd
chrX	1620101	1621043	943	8.67	9.09	8.08	1.01	2.23e-07	2.95e-05	4.53018	Intron (FBtr0303564/FBgn0283451, intron 1 of 7)	6	1523554	1668788	145235	2	FBgn0025390	47745	31111	Mur2B	Mucin related 2B	Mur2B
chr2R	6772153	6772963	811	8.39	8.76	7.9	0.87	3.11e-07	3.16e-05	4.50031	Intron (FBtr0329849/FBgn0085421, intron 5 of 19)	2	6759715	6798941	39227	2	FBgn0085421	25978	35588	Epac	Exchange protein directly activated by cAMP	Epac
chr2L	11231286	11232238	953	7.06	6.21	7.6	-1.39	3.39e-07	3.41e-05	4.46725	Intron (FBtr0332557/FBgn0264442, intron 3 of 8)	1	11210678	11261080	50403	1	FBgn0264442	20608	34560	ab	abrupt	ab
chr3L	5977476	5977917	442	6.81	7.36	5.93	1.43	3.44e-07	3.42e-05	4.46597	Distal Intergenic	3	5967545	5976007	8463	2	FBgn0035656	-1469	38674	CG10479	uncharacterized protein	CG10479
chrX	6129714	6130175	462	7.74	7.14	8.17	-1.03	2.73e-07	3.56e-05	4.44855	Intron (FBtr0334984/FBgn0264386, intron 11 of 26)	6	6104085	6192483	88399	2	FBgn0264386	62308	31550	Ca-alpha1T	Ca[2+]-channel protein alpha[[1]] subunit T	Ca-alpha1T
chr3L	18036141	18036657	517	8.97	9.3	8.55	0.74	3.81e-07	3.71e-05	4.43063	Intron (FBtr0306814/FBgn0000568, intron 3 of 7)	3	17950953	18064696	113744	2	FBgn0000568	28039	39999	Eip75B	Ecdysone-induced protein 75B	Eip75B
chr2R	18321702	18322245	544	7.78	8.27	7.04	1.23	4e-07	3.86e-05	4.41341	Intron (FBtr0301550/FBgn0285917, intron 2 of 11)	2	18278198	18357296	79099	2	FBgn0285917	35051	44027	sbb	scribbler	sbb
chr3L	9114168	9114916	749	7.08	6.1	7.65	-1.56	4.15e-07	3.96e-05	4.4023	Intron (FBtr0331858/FBgn0011206, intron 1 of 7)	3	9097629	9134405	36777	2	FBgn0011206	19489	39049	bol	boule	bol
chr3L	22185620	22186049	430	7.11	6.33	7.61	-1.28	4.26e-07	4.02e-05	4.39577	Intron (FBtr0301492/FBgn0037153, intron 2 of 10)	3	22136090	22247702	111613	1	FBgn0037153	49530	40453	olf413	olf413	olf413
chr3R	5606391	5606932	542	7.94	8.37	7.34	1.03	4.84e-07	4.52e-05	4.34486	Promoter	4	5603236	5606543	3308	2	FBgn0261004	0	40682	asl	asterless	asl
chr2R	23497314	23497955	642	6.84	5.91	7.4	-1.5	4.88e-07	4.52e-05	4.34486	Distal Intergenic	2	23499651	23500702	1052	1	FBgn0034869	-1696	37719	CG13558	uncharacterized protein	CG13558
chr2L	18413284	18414500	1217	8.25	7.7	8.64	-0.94	5.23e-07	4.79e-05	4.31966	Distal Intergenic	1	18403948	18404600	653	1	FBgn0265680	9336	NA	NA	NA	lncRNA:CR44487
chr2R	19075717	19076540	824	8.02	7.43	8.44	-1.01	5.3e-07	4.81e-05	4.31785	Intron (FBtr0086577/FBgn0004168, intron 1 of 10)	2	19067155	19121958	54804	1	FBgn0004168	8562	NA	NA	NA	5-HT1A
chr3R	27379724	27380339	616	7.25	6.52	7.73	-1.21	6.37e-07	5.62e-05	4.25026	3' UTR	4	27375088	27437482	62395	2	FBgn0016061	57143	43300	side	sidestep	side
chr3R	6481794	6482953	1160	7.29	6.53	7.78	-1.24	7e-07	6.11e-05	4.21396	5' UTR	4	6478311	6495025	16715	1	FBgn0037448	3483	40797	CG15186	uncharacterized protein	CG15186
chr3R	13252341	13253031	691	7.68	8.12	7.06	1.05	7.24e-07	6.26e-05	4.20343	Intron (FBtr0335223/FBgn0000024, intron 1 of 9)	4	13222951	13259517	36567	2	FBgn0000024	6486	41625	Ace	Acetylcholine esterase	Ace
chr3L	20930695	20931045	351	5.65	4.29	6.34	-2.05	8.24e-07	7e-05	4.1549	Intron (FBtr0078267/FBgn0011591, intron 4 of 6)	3	20925891	20949512	23622	2	FBgn0011591	18467	40314	fng	fringe	fng
chrX	12147440	12148719	1280	8.51	8.02	8.87	-0.85	6e-07	7.12e-05	4.14752	Intron (FBtr0346335/FBgn0267001, intron 3 of 19)	6	12043698	12335214	291517	1	FBgn0267001	103742	32183	Ten-a	Tenascin accessory	Ten-a
chr3L	6503737	6504792	1056	8.2	8.57	7.69	0.89	8.49e-07	7.14e-05	4.1463	Intron (FBtr0076968/FBgn0020251, intron 1 of 6)	3	6495680	6550104	54425	1	FBgn0020251	8057	38736	sfl	sulfateless	sfl
chr2R	20830535	20831379	845	6.91	6.07	7.44	-1.38	8.65e-07	7.21e-05	4.14206	Intron (FBtr0071562/FBgn0011674, intron 1 of 3)	2	20821262	20836028	14767	2	FBgn0011674	4649	37355	insc	inscuteable	insc
chr3R	6560742	6561493	752	6.95	6.01	7.51	-1.51	8.9e-07	7.35e-05	4.13371	Intron (FBtr0336453/FBgn0053202, intron 2 of 7)	4	6529169	6593330	64162	2	FBgn0053202	31837	40800	dpr11	defective proboscis extension response 11	dpr11
chr2L	20591518	20591962	445	7.18	7.65	6.46	1.19	9.51e-07	7.79e-05	4.10846	Intron (FBtr0343861/FBgn0266214, intron 3 of 4)	1	20583656	20626206	42551	2	FBgn0266214	34244	NA	NA	NA	lncRNA:CR44909
chr3R	13622450	13623266	817	7.94	7.19	8.43	-1.25	9.69e-07	7.87e-05	4.10403	Distal Intergenic	4	13617750	13618559	810	2	FBgn0267240	-3891	NA	NA	NA	lncRNA:CR45680
chr3L	17798010	17798778	769	8.54	8.09	8.88	-0.79	1.09e-06	8.69e-05	4.06098	3' UTR	3	17797738	17802279	4542	2	FBgn0052190	3501	39978	NUCB1	NUCB1	NUCB1
chr2R	21925900	21926351	452	6.26	5.2	6.87	-1.67	1.24e-06	9.71e-05	4.01278	Intron (FBtr0112593/FBgn0085397, intron 2 of 4)	2	21872030	21946259	74230	1	FBgn0085397	53870	5740472	Fili	Fish-lips	Fili
chr2R	21400539	21401480	942	7.56	6.89	8.01	-1.13	1.3e-06	0.000101	3.99568	Intron (FBtr0305897/FBgn0010415, intron 2 of 4)	2	21392402	21481176	88775	2	FBgn0010415	79696	37447	Sdc	Syndecan	Sdc
chrX	20447869	20449932	2064	10.62	10.93	10.21	0.72	8.97e-07	0.000102	3.9914	Promoter	6	20449331	20467065	17735	1	FBgn0052506	0	318059	CG32506	uncharacterized protein	CG32506
chr2R	24441994	24442714	721	6.99	6.22	7.49	-1.27	1.34e-06	0.000104	3.98297	Distal Intergenic	2	24445500	24446839	1340	1	FBgn0035005	-2786	37900	CG3483	uncharacterized protein	CG3483
chr3R	18602567	18603392	826	7.45	6.79	7.9	-1.11	1.43e-06	0.000109	3.96257	Intron (FBtr0329922/FBgn0263974, intron 3 of 9)	4	18592801	18621327	28527	2	FBgn0038629	17935	42232	CG14304	uncharacterized protein	CG14304
chr2R	23254546	23255179	634	7.06	6.25	7.58	-1.33	1.45e-06	0.000109	3.96257	Distal Intergenic	2	23246610	23247893	1284	2	FBgn0034837	-6653	37684	RpL22-like	Ribosomal protein L22-like	RpL22-like
chr2L	13618189	13618758	570	6.63	5.74	7.18	-1.43	1.42e-06	0.000109	3.96257	Intron (FBtr0342903/FBgn0259984, intron 5 of 10)	1	13550139	13639411	89273	1	FBgn0259984	68050	34772	kuz	kuzbanian	kuz
chr2L	12359705	12360922	1218	7.93	8.34	7.36	0.98	1.54e-06	0.000114	3.9431	Intron (FBtr0304856/FBgn0262475, intron 4 of 9)	1	12344219	12397528	53310	1	FBgn0262475	15486	250811	bru2	bruno 2	bru2
chr2L	9283565	9284186	622	7.56	6.82	8.05	-1.23	1.53e-06	0.000114	3.9431	Intron (FBtr0079796/FBgn0267252, intron 2 of 2)	1	9256563	9302494	45932	1	FBgn0267252	27002	45234	Ggamma30A	G protein subunit gamma at 30A	Ggamma30A
chr3R	22852654	22853218	565	6.77	5.94	7.29	-1.35	1.65e-06	0.000121	3.91721	Distal Intergenic	4	22851088	22851804	717	2	FBgn0264428	-850	NA	NA	NA	lncRNA:CR43846
chr2R	23501966	23502435	470	6.53	5.63	7.08	-1.45	1.76e-06	0.000127	3.8962	Downstream (1-2kb)	2	23502946	23503815	870	1	FBgn0034870	-511	37720	CG13559	uncharacterized protein	CG13559
chr2L	3539969	3540285	317	7.73	7.16	8.14	-0.98	1.83e-06	0.000131	3.88273	5' UTR	1	3539247	3548423	9177	1	FBgn0024244	722	49638	drm	drumstick	drm
chr2R	20531274	20532002	729	7.31	6.61	7.78	-1.17	2e-06	0.000142	3.84771	Promoter	2	20531867	20532969	1103	1	FBgn0265862	0	NA	NA	NA	lncRNA:CR44651
chr2R	19021853	19022625	773	8.2	8.56	7.72	0.84	2.07e-06	0.000146	3.83565	3' UTR	2	19022325	19032642	10318	2	FBgn0263116	10017	37191	5-HT1B	5-hydroxytryptamine (serotonin) receptor 1B	5-HT1B
chr3L	15384345	15385539	1195	8.17	7.68	8.54	-0.86	2.14e-06	0.00015	3.82391	Distal Intergenic	3	15407832	15408267	436	1	FBgn0036495	-22293	2768950	CG33259	uncharacterized protein	CG33259
chr2R	5879321	5879847	527	6.47	5.54	7.03	-1.48	2.16e-06	0.00015	3.82391	5' UTR	2	5879196	5880395	1200	2	FBgn0265631	548	19834939	CG44438	uncharacterized protein	CG44438
chr3L	11438606	11439554	949	7.37	7.82	6.71	1.11	2.41e-06	0.000164	3.78516	Distal Intergenic	3	11435650	11436206	557	1	FBgn0265741	2956	NA	NA	NA	lncRNA:CR44548
chr2L	11704163	11704620	458	7.51	6.9	7.94	-1.05	2.8e-06	0.000189	3.72354	Distal Intergenic	1	11694804	11696107	1304	1	FBgn0032372	9359	34586	CG4988	uncharacterized protein	CG4988
chr2L	8791819	8792273	455	7.18	7.66	6.47	1.19	2.88e-06	0.000191	3.71897	Distal Intergenic	1	8781799	8782500	702	2	FBgn0261627	-9319	10178945	CG42710	uncharacterized protein	CG42710
chr2L	20546245	20546656	412	7.08	6.36	7.56	-1.2	2.86e-06	0.000191	3.71897	Distal Intergenic	1	20550951	20551354	404	2	FBgn0284409	4698	NA	NA	NA	lncRNA:TS1
chr2R	16514689	16515581	893	7.82	7.23	8.23	-1	2.97e-06	0.000195	3.70997	Intron (FBtr0087088/FBgn0011260, intron 2 of 14)	2	16500178	16533459	33282	1	FBgn0011260	14511	36846	Sema2a	Semaphorin 2a	Sema2a
chr2R	13007982	13009457	1476	8.19	8.62	7.58	1.04	3.1e-06	0.0002	3.69897	Distal Intergenic	2	12996501	13007911	11411	1	FBgn0265623	11481	36432	Su(z)2	Suppressor of zeste 2	Su(z)2
chr3L	9051665	9052253	589	8.8	9.13	8.39	0.74	3.23e-06	0.000208	3.68194	5' UTR	3	9048781	9066027	17247	2	FBgn0000116	13774	39041	Argk	Arginine kinase	Argk
chr3R	26811070	26811574	505	6.53	5.66	7.07	-1.41	3.27e-06	0.000209	3.67985	Intron (FBtr0330155/FBgn0262473, intron 2 of 4)	4	26799041	26842403	43363	1	FBgn0262473	12029	43222	Tl	Toll	Tl
chr3R	21089375	21090739	1365	9.4	9.71	9	0.71	3.74e-06	0.000237	3.62525	Intron (FBtr0344590/FBgn0265067, intron 1 of 1)	4	21083043	21097827	14785	2	FBgn0038853	7088	42496	RhoGAP93B	Rho GTPase activating protein at 93B	RhoGAP93B
chr2L	20939650	20940712	1063	8.5	8.06	8.83	-0.76	4.02e-06	0.000252	3.5986	Distal Intergenic	1	20929456	20934113	4658	2	FBgn0032908	-5537	35366	CG9270	uncharacterized protein	CG9270
chr2L	4168299	4169183	885	7.34	6.68	7.79	-1.12	4.02e-06	0.000252	3.5986	Distal Intergenic	1	4164689	4166134	1446	2	FBgn0026394	-2165	33623	Or24a	Odorant receptor 24a	Or24a
chrX	2300590	2301722	1133	10.1	10.4	9.73	0.67	2.39e-06	0.00026	3.58503	Intron (FBtr0344007/FBgn0003079, intron 2 of 6)	6	2295466	2343870	48405	1	FBgn0003079	5124	31221	Raf	Raf oncogene	Raf
chr3R	22950018	22950639	622	6.54	5.66	7.08	-1.42	4.39e-06	0.000269	3.57025	Intron (FBtr0084337/FBgn0017590, intron 3 of 10)	4	22899284	22961731	62448	1	FBgn0017590	50734	42707	klg	klingon	klg
chr2L	4346744	4347362	619	7.14	6.42	7.61	-1.2	4.44e-06	0.000271	3.56703	Downstream (1-2kb)	1	4347501	4347954	454	1	FBgn0265908	-139	NA	NA	NA	lncRNA:CR44697
chr3R	27758744	27759158	415	7.2	7.65	6.53	1.12	4.78e-06	0.000287	3.54212	Distal Intergenic	4	27736538	27748366	11829	1	FBgn0005659	22206	43334	Ets98B	Ets at 98B	Ets98B
chr2L	20906730	20907940	1211	9.06	9.4	8.62	0.77	4.91e-06	0.000291	3.53611	Intron (FBtr0081442/FBgn0032901, intron 1 of 10)	1	20871335	20918931	47597	2	FBgn0032901	10991	35359	sky	skywalker	sky
chr2L	939919	940998	1080	8.98	9.29	8.57	0.72	5.11e-06	0.000302	3.51999	Intron (FBtr0077949/FBgn0028481, intron 2 of 10)	1	922793	958098	35306	1	FBgn0028481	17126	33276	CG4341	uncharacterized protein	CG4341
chr2R	19210465	19210778	314	6.87	7.35	6.13	1.22	5.42e-06	0.000318	3.49757	Intron (FBtr0086503/FBgn0263395, intron 2 of 14)	2	19178738	19227193	48456	1	FBgn0263395	31727	37203	hppy	happyhour	hppy
chr3L	704708	705519	812	7.46	7.9	6.81	1.1	5.53e-06	0.000318	3.49757	Promoter	3	705330	705723	394	1	FBgn0265707	0	NA	NA	NA	lncRNA:CR44514
chr2R	22468889	22469762	874	7.94	7.41	8.33	-0.92	5.84e-06	0.000334	3.47625	Exon (FBtr0342991/FBgn0034731, exon 5 of 8)	2	22454741	22472995	18255	1	FBgn0034731	14148	37567	CG10384	uncharacterized protein	CG10384
chr3R	11777869	11779011	1143	9.86	10.16	9.47	0.68	6.08e-06	0.000343	3.46471	5' UTR	4	11765038	11779128	14091	2	FBgn0265276	117	41423	l(3)neo38	lethal (3) neo38	l(3)neo38
chr3L	22078334	22079026	693	7.91	7.29	8.34	-1.04	6.52e-06	0.000361	3.44249	Downstream (2-3kb)	3	22080322	22080554	233	1	FBgn0259973	-1296	8674014	Sfp79B	Seminal fluid protein 79	Sfp79B
chr2L	1311959	1312681	723	7.69	8.1	7.1	1	6.63e-06	0.000365	3.43771	Distal Intergenic	1	1329161	1329993	833	1	FBgn0011294	-16480	33317	a5	antennal protein 5	a5
chr3R	11004391	11005270	880	8.14	8.5	7.68	0.82	6.69e-06	0.000366	3.43652	Intron (FBtr0301070/FBgn0083950, intron 2 of 14)	4	10972381	11050175	77795	1	FBgn0083950	32010	4379854	side-VI	sidestep VI	side-VI
chr3R	13193135	13193505	371	6.79	6.01	7.29	-1.27	6.92e-06	0.000375	3.42597	Distal Intergenic	4	13191599	13192509	911	1	FBgn0038125	1536	41622	CG8141	uncharacterized protein	CG8141
chr2R	24381417	24382298	882	7.57	6.99	7.98	-0.99	7.24e-06	0.000385	3.41454	Exon (FBtr0072367/FBgn0000037, exon 5 of 5)	2	24378630	24390294	11665	2	FBgn0000037	7996	37892	mAChR-A	muscarinic Acetylcholine Receptor, A-type	mAChR-A
chr3L	15375031	15375391	361	7.66	8.06	7.1	0.97	7.31e-06	0.000386	3.41341	Distal Intergenic	3	15407832	15408267	436	1	FBgn0036495	-32441	2768950	CG33259	uncharacterized protein	CG33259
chr2L	20097282	20098440	1159	8.36	8.7	7.92	0.78	7.62e-06	0.000393	3.40561	Promoter	1	20097581	20103375	5795	1	FBgn0032850	0	35300	Kua	Kua	Kua
chr2L	18782794	18783901	1108	9.45	9	9.79	-0.78	7.65e-06	0.000393	3.40561	Intron (FBtr0305620/FBgn0045852, intron 1 of 7)	1	18762874	18792906	30033	2	FBgn0045852	9005	35135	ham	hamlet	ham
chr3R	10571265	10571551	287	7.24	6.6	7.68	-1.08	7.63e-06	0.000393	3.40561	Intron (FBtr0082255/FBgn0001235, intron 6 of 13)	4	10507561	10639568	132008	2	FBgn0001235	68017	41273	hth	homothorax	hth
chr3L	14869410	14869740	331	6.56	5.75	7.08	-1.33	7.58e-06	0.000393	3.40561	Exon (FBtr0075695/FBgn0036454, exon 10 of 19)	3	14805136	14882224	77089	1	FBgn0036454	64274	39616	CG17839	uncharacterized protein	CG17839
chr2L	13471368	13471889	522	6.86	7.34	6.13	1.21	7.91e-06	0.000405	3.39254	Intron (FBtr0308949/FBgn0263354, intron 3 of 8)	1	13415431	13500427	84997	1	FBgn0263354	55937	326165	CG42784	uncharacterized protein	CG42784
chrX	11378067	11379796	1730	9.18	9.49	8.8	0.69	3.96e-06	0.000407	3.39041	Intron (FBtr0073483/FBgn0001624, intron 3 of 5)	6	11369665	11409776	40112	1	FBgn0001624	8402	32083	dlg1	discs large 1	dlg1
chr3R	14375814	14376225	412	8.29	7.8	8.65	-0.85	8.03e-06	0.000408	3.38934	Exon (FBtr0343915/FBgn0266248, exon 1 of 1)	4	14375399	14377344	1946	2	FBgn0266248	1119	NA	NA	NA	lncRNA:CR44943
chr3L	19112574	19113144	571	7.16	6.51	7.61	-1.09	8.26e-06	0.000415	3.38195	Intron (FBtr0346533/FBgn0036851, intron 2 of 4)	3	19105381	19138975	33595	2	FBgn0036851	25831	40088	CG14082	uncharacterized protein	CG14082
chr3R	15769758	15770305	548	7.04	6.3	7.52	-1.22	9e-06	0.000448	3.34872	Distal Intergenic	4	15766246	15767438	1193	2	FBgn0038357	-2320	41904	CG5623	uncharacterized protein	CG5623
chr3L	10754293	10755245	953	8.24	7.74	8.61	-0.87	9.13e-06	0.000452	3.34486	Distal Intergenic	3	10771925	10773399	1475	1	FBgn0262890	-16680	12798172	CG43245	uncharacterized protein	CG43245
chr2R	20509584	20510148	565	7.14	6.45	7.61	-1.16	9.2e-06	0.000453	3.3439	Exon (FBtr0342694/FBgn0265858, exon 1 of 1)	2	20509395	20509695	301	1	FBgn0265858	189	NA	NA	NA	lncRNA:CR44647
chr2L	1349463	1350057	595	7.72	8.11	7.19	0.92	9.46e-06	0.000461	3.3363	Downstream (1-2kb)	1	1351728	1352868	1141	2	FBgn0031332	2811	33320	CG5556	uncharacterized protein	CG5556
chr3R	12099752	12100515	764	7.28	7.71	6.66	1.04	9.62e-06	0.000464	3.33348	Intron (FBtr0082542/FBgn0051361, intron 2 of 6)	4	12094876	12111420	16545	1	FBgn0051361	4876	41470	dpr17	defective proboscis extension response 17	dpr17
chr3R	15573279	15573824	546	7.13	6.44	7.59	-1.15	9.84e-06	0.000472	3.32606	Distal Intergenic	4	15548628	15552833	4206	2	FBgn0038350	-20446	41897	AOX4	Aldehyde oxidase 4	AOX4
chr2L	13205048	13205654	607	8.79	9.09	8.41	0.69	1.06e-05	0.000505	3.29671	Intron (FBtr0080439/FBgn0032482, intron 1 of 6)	1	13203762	13210828	7067	1	FBgn0032482	1286	34716	Pect	Phosphoethanolamine cytidylyltransferase	Pect
chr3R	21186643	21187843	1201	8.49	8.8	8.08	0.72	1.14e-05	0.000531	3.27491	Intron (FBtr0084018/FBgn0264357, intron 7 of 12)	4	21140739	21214269	73531	1	FBgn0264357	45904	42515	SNF4Agamma	SNF4/AMP-activated protein kinase gamma subunit	SNF4Agamma
chr3R	22872755	22873543	789	6.98	6.21	7.48	-1.26	1.13e-05	0.000531	3.27491	Distal Intergenic	4	22851088	22851804	717	2	FBgn0264428	-20951	NA	NA	NA	lncRNA:CR43846
chr3L	1184856	1185237	382	6.32	5.43	6.87	-1.44	1.13e-05	0.000531	3.27491	Distal Intergenic	3	1189588	1190472	885	1	FBgn0035186	-4351	38120	CG13912	uncharacterized protein	CG13912
chr2L	4705313	4705675	363	6.19	5.28	6.75	-1.48	1.16e-05	0.000537	3.27003	5' UTR	1	4694721	4722465	27745	1	FBgn0085380	10592	5740672	CG34351	uncharacterized protein	CG34351
chr2R	11177997	11178923	927	9.47	9.76	9.1	0.66	1.27e-05	0.000583	3.23433	Intron (FBtr0330619/FBgn0003396, intron 1 of 7)	2	11159086	11217394	58309	1	FBgn0003396	18911	36171	shn	schnurri	shn
chr2L	16570074	16570821	748	7.59	7.04	7.98	-0.94	1.34e-05	0.000613	3.21254	Intron (FBtr0300003/FBgn0259735, intron 2 of 4)	1	16545016	16663218	118203	1	FBgn0259735	25058	34987	mtgo	miles to go	mtgo
chr3R	26606378	26607284	907	9.42	9.71	9.06	0.65	1.37e-05	0.000622	3.20621	Promoter	4	26607047	26608440	1394	1	FBgn0266256	0	NA	NA	NA	lncRNA:CR44951
chr2R	13437315	13439132	1818	9.53	9.81	9.18	0.62	1.41e-05	0.000637	3.19586	Promoter	2	13437866	13437939	74	1	FBgn0050509	0	NA	NA	NA	tRNA:Ile-AAT-1-8
chr3L	4409492	4410215	724	9.93	10.27	9.49	0.78	1.43e-05	0.000639	3.1945	Intron (FBtr0113140/FBgn0035542, intron 1 of 4)	3	4406943	4420648	13706	1	FBgn0035542	2549	38543	DOR	Diabetes and obesity regulated	DOR
chr2R	18373065	18374538	1474	8.94	9.22	8.59	0.63	1.55e-05	0.000684	3.16494	Distal Intergenic	2	18377487	18378196	710	1	FBgn0261700	-2949	NA	NA	NA	lncRNA:CR42736
chr3R	22717269	22717941	673	7.45	7.88	6.83	1.05	1.59e-05	0.000697	3.15677	Exon (FBtr0310426/FBgn0051151, exon 3 of 11)	4	22710883	22721150	10268	2	FBgn0051151	3209	42687	wge	winged eye	wge
chr2R	17232412	17233371	960	8.11	7.63	8.47	-0.84	1.59e-05	0.000697	3.15677	Intron (FBtr0310346/FBgn0265487, intron 2 of 9)	2	17216549	17379376	162828	1	FBgn0265487	15863	36945	mbl	muscleblind	mbl
chr3L	10226098	10227123	1026	9.17	9.47	8.78	0.7	1.65e-05	0.000718	3.14388	Distal Intergenic	3	10220483	10225240	4758	2	FBgn0052056	-858	326186	scramb1	scramblase 1	scramb1
chr2L	19213842	19214597	756	7.66	7.11	8.06	-0.95	1.68e-05	0.000723	3.14086	Downstream (2-3kb)	1	19215451	19215967	517	1	FBgn0267928	-854	NA	NA	NA	lncRNA:CR46209
chr3L	16147390	16148545	1156	8.29	8.61	7.86	0.75	1.69e-05	0.000726	3.13906	5' UTR	3	16137802	16164701	26900	2	FBgn0036576	16156	39772	CG5151	uncharacterized protein	CG5151
chr3L	20939681	20940299	619	7.33	6.73	7.76	-1.03	1.83e-05	0.000774	3.11126	Intron (FBtr0078267/FBgn0011591, intron 2 of 6)	3	20925891	20949512	23622	2	FBgn0011591	9213	40314	fng	fringe	fng
chr2L	5609960	5610619	660	6.9	6.17	7.39	-1.22	1.83e-05	0.000774	3.11126	Intron (FBtr0302933/FBgn0031725, intron 5 of 11)	1	5601723	5617946	16224	2	FBgn0031725	7327	33793	DIP-eta	Dpr-interacting protein eta	DIP-eta
chr3R	15730722	15731121	400	6.29	5.42	6.83	-1.4	1.94e-05	0.000814	3.08938	Downstream (1-2kb)	4	15731746	15732694	949	1	FBgn0085303	-625	5740212	CG34274	uncharacterized protein	CG34274
chr3L	14580195	14580655	461	7.55	7	7.95	-0.95	1.96e-05	0.000816	3.08831	Downstream (2-3kb)	3	14567440	14568133	694	1	FBgn0261816	12755	10178900	CG42758	uncharacterized protein	CG42758
chr2L	15339525	15339987	463	7.98	7.39	8.4	-1.02	1.98e-05	0.000823	3.0846	Distal Intergenic	1	15333866	15336138	2273	1	FBgn0001981	5659	34903	esg	escargot	esg
chr2R	20446013	20446743	731	7.52	6.97	7.91	-0.94	2.26e-05	0.000928	3.03245	Intron (FBtr0112774/FBgn0086604, intron 3 of 15)	2	20424338	20478951	54614	1	FBgn0086604	21675	37310	side-VIII	sidestep VIII	side-VIII
chr3L	10568390	10569528	1139	8.23	7.8	8.56	-0.76	2.33e-05	0.000945	3.02457	Exon (FBtr0305097/FBgn0052062, exon 3 of 14)	3	10481412	10594012	112601	1	FBgn0052062	86978	39198	Rbfox1	RNA-binding Fox protein 1	Rbfox1
chr3R	12579322	12579753	432	7.08	7.54	6.41	1.13	2.4e-05	0.000969	3.01368	Intron (FBtr0304846/FBgn0038063, intron 1 of 6)	4	12550625	12595725	45101	2	FBgn0038063	15972	41549	Octbeta2R	Octopamine beta2 receptor	Octbeta2R
chr2R	13695918	13697746	1829	8.36	7.96	8.67	-0.72	2.41e-05	0.000969	3.01368	Intron (FBtr0087625/FBgn0000633, intron 3 of 12)	2	13623044	13749367	126324	1	FBgn0000633	72874	36521	CG17716	uncharacterized protein	CG17716
chr3R	26404868	26405136	269	6.12	5.21	6.68	-1.47	2.44e-05	0.000977	3.01011	Distal Intergenic	4	26401909	26403656	1748	2	FBgn0039424	-1212	43188	ppk15	pickpocket 15	ppk15
chr3L	13568437	13568970	534	6.84	6.16	7.3	-1.15	2.64e-05	0.00103	2.98716	Intron (FBtr0330351/FBgn0264001, intron 5 of 12)	3	13521907	13803400	281494	2	FBgn0264001	234430	39527	bru3	bruno 3	bru3
chr2L	17339814	17340500	687	7.93	7.42	8.31	-0.89	2.72e-05	0.00106	2.97469	Distal Intergenic	1	17353730	17354668	939	2	FBgn0265270	14168	NA	NA	NA	lncRNA:CR43239
chr3R	11849506	11850157	652	7.36	6.73	7.79	-1.06	2.95e-05	0.00113	2.94692	Intron (FBtr0082517/FBgn0037956, intron 1 of 2)	4	11822702	11869460	46759	2	FBgn0037956	19303	41434	CG6959	uncharacterized protein	CG6959
chr3R	15580105	15580699	595	6.87	6.19	7.33	-1.14	2.96e-05	0.00113	2.94692	Distal Intergenic	4	15548628	15552833	4206	2	FBgn0038350	-27272	41897	AOX4	Aldehyde oxidase 4	AOX4
chrX	6204519	6205169	651	7.04	6.37	7.5	-1.13	1.28e-05	0.00117	2.93181	Distal Intergenic	6	6200188	6202559	2372	2	FBgn0040069	-1960	31551	vanin-like	vanin-like	vanin-like
chrX	6696469	6696853	385	7.92	8.28	7.45	0.82	1.3e-05	0.00118	2.92812	3' UTR	6	6695866	6698567	2702	2	FBgn0029894	1714	31610	CG14440	uncharacterized protein	CG14440
chr3R	20283728	20284599	872	9.24	9.51	8.9	0.61	3.15e-05	0.00119	2.92445	Intron (FBtr0305029/FBgn0262582, intron 2 of 18)	4	20252770	20303942	51173	1	FBgn0262582	30958	53560	cic	capicua	cic
chr2L	19971484	19972323	840	7.85	7.38	8.21	-0.83	3.15e-05	0.00119	2.92445	5' UTR	1	19968684	20017282	48599	2	FBgn0264443	44959	35284	CG43861	uncharacterized protein	CG43861
chr3L	8864751	8865543	793	7.2	6.57	7.63	-1.06	3.16e-05	0.00119	2.92445	Intron (FBtr0076583/FBgn0263930, intron 1 of 8)	3	8827505	8891192	63688	1	FBgn0263930	37246	39013	dally	division abnormally delayed	dally
chr3L	5989767	5990071	305	6.62	7.13	5.84	1.28	3.24e-05	0.0012	2.92082	Distal Intergenic	3	5984120	5984340	221	2	FBgn0266989	-5427	NA	NA	NA	lncRNA:CR45440
chr2R	10546923	10547340	418	7.08	7.55	6.37	1.18	3.24e-05	0.0012	2.92082	Promoter	2	10544925	10547260	2336	2	FBgn0283426	0	NA	NA	NA	lncRNA:acal
chrX	15443351	15443849	499	8.77	9.1	8.33	0.76	1.35e-05	0.0012	2.92082	Downstream (2-3kb)	6	15386038	15441252	55215	2	FBgn0263257	-2099	32468	Cngl	Cyclic nucleotide-gated ion channel-like	Cngl
chr3R	31222680	31223164	485	9.13	9.39	8.81	0.59	3.24e-05	0.0012	2.92082	Intron (FBtr0085758/FBgn0039831, intron 2 of 5)	4	31220702	31231259	10558	1	FBgn0039831	1978	43694	CG12054	uncharacterized protein	CG12054
chr3R	28384494	28385095	602	6.51	5.75	7.01	-1.26	3.28e-05	0.00121	2.91721	Distal Intergenic	4	28352242	28353620	1379	1	FBgn0039582	32252	NA	NA	NA	Or98b
chr3L	17712599	17713276	678	6.77	6.09	7.24	-1.14	3.51e-05	0.00128	2.89279	Intron (FBtr0075186/FBgn0052183, intron 2 of 9)	3	17690015	17748839	58825	1	FBgn0052183	22584	39972	Ccn	Ccn	Ccn
chr2R	11767717	11768189	473	6.13	5.26	6.67	-1.41	3.61e-05	0.00131	2.88273	Intron (FBtr0304622/FBgn0033652, intron 1 of 4)	2	11756817	11814424	57608	1	FBgn0033652	10900	36258	ths	thisbe	ths
chr3R	15493313	15493938	626	7.3	6.67	7.73	-1.06	3.85e-05	0.00138	2.86012	Downstream (2-3kb)	4	15494602	15495620	1019	1	FBgn0038345	-664	41892	CG5213	uncharacterized protein	CG5213
chr2L	14142077	14142683	607	8.35	8.73	7.83	0.91	4e-05	0.00141	2.85078	Intron (FBtr0445730/FBgn0283651, intron 4 of 7)	1	14104090	14160587	56498	1	FBgn0283651	37987	34829	CG46301	uncharacterized protein	CG46301
chr3L	20830773	20831156	384	7.87	8.22	7.41	0.8	3.97e-05	0.00141	2.85078	Intron (FBtr0299891/FBgn0259243, intron 1 of 4)	3	20816118	20836048	19931	1	FBgn0259243	14655	40305	Pka-R1	Protein kinase, cAMP-dependent, regulatory subunit type 1	Pka-R1
chr3L	1696809	1697463	655	7.51	6.97	7.9	-0.93	4.12e-05	0.00144	2.84164	Intron (FBtr0303102/FBgn0035260, intron 1 of 3)	3	1674709	1715541	40833	1	FBgn0035260	22100	38214	CG7991	uncharacterized protein	CG7991
chrX	10360096	10360792	697	8.06	8.4	7.61	0.79	1.66e-05	0.00145	2.83863	Exon (FBtr0347009/FBgn0028331, exon 2 of 8)	6	10348680	10366273	17594	2	FBgn0028331	5481	31964	l(1)G0289	lethal (1) G0289	l(1)G0289
chr3L	22226726	22227127	402	6.84	6.17	7.3	-1.12	4.18e-05	0.00146	2.83565	Intron (FBtr0301492/FBgn0037153, intron 6 of 10)	3	22136090	22247702	111613	1	FBgn0037153	90636	40453	olf413	olf413	olf413
chrX	20858906	20859316	411	7.48	6.93	7.87	-0.94	1.7e-05	0.00147	2.83268	Intron (FBtr0342859/FBgn0085387, intron 2 of 10)	6	20761071	20927050	165980	2	FBgn0085387	67734	33062	shakB	shaking B	shakB
chr2R	8310812	8311516	705	7.96	7.35	8.39	-1.03	4.29e-05	0.00149	2.82681	Promoter	2	8310521	8311234	714	2	FBgn0265642	0	NA	NA	NA	lncRNA:TS18
chr2L	14943622	14944838	1217	8.46	8.06	8.77	-0.71	4.5e-05	0.00155	2.80967	Intron (FBtr0345431/FBgn0259213, intron 2 of 19)	1	14907489	14972300	64812	2	FBgn0259213	27462	3346206	side-II	sidestep II	side-II
chr3L	741420	742110	691	7.09	6.45	7.52	-1.07	4.53e-05	0.00155	2.80967	Intron (FBtr0331769/FBgn0035160, intron 1 of 1)	3	737680	755489	17810	2	FBgn0035160	13379	38090	hng3	hinge3	hng3
chr2L	17542558	17543338	781	7.9	8.25	7.44	0.81	4.56e-05	0.00156	2.80688	Distal Intergenic	1	17541854	17542383	530	1	FBgn0262996	704	NA	NA	NA	lncRNA:CR43304
chr3R	11139989	11140564	576	7.77	7.29	8.13	-0.83	4.82e-05	0.00163	2.78781	Distal Intergenic	4	11137177	11139742	2566	1	FBgn0037862	2812	41326	mAcon2	Mitochondrial aconitase 2	mAcon2
chr3R	18896787	18897177	391	6.9	7.35	6.25	1.1	5.01e-05	0.00168	2.77469	Downstream (2-3kb)	4	18898121	18899342	1222	1	FBgn0038655	-944	42260	CG14297	uncharacterized protein	CG14297
chr2R	11051959	11052221	263	6.32	6.84	5.52	1.31	5.59e-05	0.00187	2.72816	Intron (FBtr0333066/FBgn0040765, intron 2 of 4)	2	10977956	11116378	138423	2	FBgn0040765	64157	2768719	luna	luna	luna
chrX	18028956	18029973	1018	8.07	8.43	7.61	0.82	2.4e-05	0.00199	2.70115	Intron (FBtr0089661/FBgn0003380, intron 3 of 13)	6	17924307	18063247	138941	2	FBgn0003380	33274	32780	Sh	Shaker	Sh
chr3L	8002530	8002940	411	6.64	7.11	5.94	1.17	6.1e-05	0.00201	2.6968	Intron (FBtr0076755/FBgn0011817, intron 2 of 8)	3	7979046	8054147	75102	1	FBgn0011817	23484	38890	nmo	nemo	nmo
chr2L	20492146	20492562	417	6.73	6.07	7.18	-1.12	6.29e-05	0.00207	2.68403	Distal Intergenic	1	20495030	20495758	729	1	FBgn0054007	-2468	3885610	CG34007	uncharacterized protein	CG34007
chrX	21241418	21242403	986	7.97	8.32	7.52	0.79	2.62e-05	0.00211	2.67572	Intron (FBtr0310652/FBgn0052521, intron 1 of 3)	6	21205310	21281171	75862	2	FBgn0052521	38768	33098	CG32521	uncharacterized protein	CG32521
chr2R	22335462	22336256	795	7.94	7.5	8.27	-0.78	7e-05	0.00226	2.64589	Exon (FBtr0071847/FBgn0034720, exon 11 of 13)	2	22333500	22373109	39610	2	FBgn0034720	36853	37552	Liprin-gamma	Liprin-gamma	Liprin-gamma
chr2L	20544355	20544915	561	6.8	6.1	7.28	-1.18	7.21e-05	0.0023	2.63827	Distal Intergenic	1	20539393	20539974	582	2	FBgn0267271	-4381	NA	NA	NA	lncRNA:CR45707
chr2L	9116228	9116587	360	6.31	5.53	6.82	-1.29	7.24e-05	0.0023	2.63827	Distal Intergenic	1	9119582	9120040	459	1	FBgn0265828	-2995	NA	NA	NA	lncRNA:CR44617
chr2L	9754685	9755441	757	8.6	8.88	8.24	0.64	7.58e-05	0.00239	2.6216	Distal Intergenic	1	9758342	9762375	4034	1	FBgn0270924	-2901	34292	zf30C	zinc finger protein 30C	zf30C
chr2R	17346038	17346674	637	7.33	6.72	7.75	-1.03	7.76e-05	0.00243	2.61439	Intron (FBtr0310346/FBgn0265487, intron 3 of 9)	2	17216549	17379376	162828	1	FBgn0265487	129489	36945	mbl	muscleblind	mbl
chr3L	19073164	19073850	687	8.62	8.24	8.92	-0.67	8.62e-05	0.00268	2.57187	Intron (FBtr0333220/FBgn0036844, intron 1 of 4)	3	19066155	19086426	20272	2	FBgn0036844	12576	40081	Mkp3	Mitogen-activated protein kinase phosphatase 3	Mkp3
chr2L	3248205	3248602	398	6.72	6.06	7.16	-1.11	8.77e-05	0.00272	2.56543	Distal Intergenic	1	3260973	3261281	309	2	FBgn0266876	12679	NA	NA	NA	lncRNA:CR45337
chr3R	13532489	13532869	381	6.18	5.38	6.7	-1.32	9.4e-05	0.00287	2.54212	Distal Intergenic	4	13528597	13529356	760	2	FBgn0261846	-3133	10178823	CG42778	uncharacterized protein	CG42778
chr2L	17514079	17514428	350	6.16	6.68	5.36	1.31	9.72e-05	0.00295	2.53018	Intron (FBtr0304742/FBgn0013810, intron 16 of 22)	1	17501401	17525515	24115	1	FBgn0013810	12678	35061	Dhc36C	Dynein heavy chain at 36C	Dhc36C
chrX	18425702	18426836	1135	7.81	8.19	7.3	0.9	3.97e-05	0.00298	2.52578	3' UTR	6	18422413	18427001	4589	1	FBgn0259223	3289	32825	CG42323	uncharacterized protein	CG42323
chr2L	18867734	18868333	600	8.09	7.67	8.42	-0.75	0.000101	0.00301	2.52143	Intron (FBtr0081111/FBgn0003896, intron 1 of 8)	1	18859507	18881261	21755	2	FBgn0003896	12928	35147	tup	tailup	tup
chr3L	5717582	5718146	565	7.47	6.95	7.85	-0.9	0.000101	0.00301	2.52143	3' UTR	3	5657913	5749599	91687	1	FBgn0085447	59669	43892	sif	still life	sif
chr2R	21733799	21734430	632	7.39	7.76	6.88	0.88	0.000101	0.00302	2.51999	Distal Intergenic	2	21727495	21728195	701	2	FBgn0265963	-5604	NA	NA	NA	lncRNA:CR44750
chr2L	178978	179527	550	8.77	9.07	8.39	0.67	0.000101	0.00302	2.51999	Intron (FBtr0078122/FBgn0016977, intron 2 of 11)	1	159032	203397	44366	1	FBgn0016977	19946	44205	spen	split ends	spen
chr2L	5230726	5231180	455	6.44	5.7	6.93	-1.23	0.000102	0.00302	2.51999	Intron (FBtr0079089/FBgn0003716, intron 1 of 2)	1	5219000	5271384	52385	2	FBgn0003716	40204	33753	tkv	thickveins	tkv
chr3L	22234206	22235040	835	8.87	9.17	8.49	0.68	0.00011	0.00324	2.48945	Intron (FBtr0301492/FBgn0037153, intron 9 of 10)	3	22136090	22247702	111613	1	FBgn0037153	98116	40453	olf413	olf413	olf413
chr3R	26347651	26348423	773	8.42	8.7	8.06	0.63	0.000111	0.00326	2.48678	Intron (FBtr0100012/FBgn0053970, intron 2 of 8)	4	26318355	26362588	44234	1	FBgn0053970	29296	43186	CG33970	uncharacterized protein	CG33970
chr3R	6096579	6097645	1067	7.2	6.63	7.6	-0.98	0.000112	0.00328	2.48413	Intron (FBtr0112922/FBgn0026077, intron 1 of 4)	4	6088799	6100887	12089	2	FBgn0026077	3242	40745	Gasp	gasp	Gasp
chr3R	13073224	13073483	260	6.09	5.25	6.62	-1.37	0.000116	0.00338	2.47108	Intron (FBtr0082711/FBgn0004666, intron 2 of 7)	4	13057755	13078124	20370	1	FBgn0004666	15469	41612	sim	single-minded	sim
chr2L	3288730	3289022	293	5.67	4.66	6.25	-1.59	0.000116	0.00338	2.47108	Downstream (2-3kb)	1	3287822	3288591	770	1	FBgn0265678	908	NA	NA	NA	lncRNA:CR44485
chr3L	2913350	2914505	1156	9.76	10.02	9.46	0.56	0.000119	0.00345	2.46218	Intron (FBtr0333899/FBgn0262593, intron 2 of 11)	3	2895017	2959579	64563	1	FBgn0262593	18333	38352	Shab	Shaker cognate b	Shab
chr3L	19361808	19362524	717	7.49	7	7.85	-0.86	0.00012	0.00346	2.46092	Intron (FBtr0089796/FBgn0052206, intron 9 of 13)	3	19340321	19412912	72592	2	FBgn0052206	50388	40105	CG32206	uncharacterized protein	CG32206
chr3R	15467763	15468608	846	6.61	5.9	7.08	-1.19	0.000124	0.00354	2.451	Intron (FBtr0083160/FBgn0286071, intron 1 of 16)	4	15442246	15476193	33948	2	FBgn0286071	7585	41887	AdamTS-A	ADAM metallopeptidase with thrombospondin type 1 motif A	AdamTS-A
chr3R	8456125	8456744	620	7.79	7.35	8.13	-0.78	0.000125	0.00357	2.44733	Intron (FBtr0345458/FBgn0266801, intron 1 of 15)	4	8364328	8477617	113290	2	FBgn0266801	20873	50003	CG45263	uncharacterized protein	CG45263
chr3L	10503695	10505214	1520	9.47	9.71	9.19	0.52	0.00013	0.00369	2.43297	Intron (FBtr0305097/FBgn0052062, intron 1 of 13)	3	10481412	10594012	112601	1	FBgn0052062	22283	39198	Rbfox1	RNA-binding Fox protein 1	Rbfox1
chr3R	23877534	23878141	608	7.09	6.53	7.49	-0.97	0.000129	0.00369	2.43297	Intron (FBtr0112907/FBgn0025574, intron 2 of 9)	4	23860162	23890052	29891	2	FBgn0025574	11911	42821	Pli	Pellino	Pli
chr3R	24574065	24575325	1261	9.27	9.54	8.95	0.58	0.000136	0.00379	2.42136	Exon (FBtr0347327/FBgn0267763, exon 1 of 1)	4	24557368	24582864	25497	2	FBgn0039209	7539	42930	REPTOR	Repressed by TOR	REPTOR
chr3R	8502171	8503298	1128	8.29	7.9	8.6	-0.7	0.000135	0.00379	2.42136	Distal Intergenic	4	8510077	8511358	1282	2	FBgn0037590	8060	41007	Or85b	Odorant receptor 85b	Or85b
chr3R	28097339	28097790	452	7.02	6.43	7.44	-1.01	0.000134	0.00379	2.42136	Distal Intergenic	4	28137647	28137965	319	2	FBgn0267746	40175	NA	NA	NA	lncRNA:CR46077
chr3R	7465904	7466260	357	6.27	5.51	6.76	-1.25	0.000143	0.00395	2.4034	Downstream (1-2kb)	4	7467940	7468662	723	2	FBgn0266239	2402	NA	NA	NA	lncRNA:CR44934
chr2L	12899345	12899881	537	7.73	7.26	8.08	-0.83	0.000144	0.00396	2.4023	Distal Intergenic	1	12912530	12916774	4245	1	FBgn0040508	-12649	34689	ACXC	Adenylyl cyclase X C	ACXC
chr3L	11453725	11454921	1197	8.3	8.6	7.93	0.68	0.000148	0.00404	2.39362	Downstream (2-3kb)	3	11457076	11458470	1395	2	FBgn0036160	3549	39279	CG12289	uncharacterized protein	CG12289
chr2L	18458452	18459102	651	10.1	10.38	9.75	0.62	0.000148	0.00404	2.39362	Intron (FBtr0306973/FBgn0263049, intron 1 of 2)	1	18455717	18473132	17416	1	FBgn0263049	2735	NA	NA	NA	lncRNA:let7C
chr3R	16748665	16749112	448	6.5	5.8	6.97	-1.17	0.000149	0.00404	2.39362	Intron (FBtr0083341/FBgn0020556, intron 2 of 2)	4	16742125	16773189	31065	2	FBgn0020556	24077	NA	NA	NA	lncRNA:bxd
chr3L	22446465	22446842	378	6.69	7.12	6.06	1.06	0.000156	0.0042	2.37675	Distal Intergenic	3	22454373	22455989	1617	1	FBgn0037162	-7531	40467	CG11449	uncharacterized protein	CG11449
chrX	2906946	2907435	490	7.05	6.38	7.51	-1.12	5.92e-05	0.00428	2.36856	Intron (FBtr0309500/FBgn0028369, intron 3 of 10)	6	2740384	3134532	394149	1	FBgn0028369	166562	31292	kirre	kin of irre	kirre
chr2R	9343984	9344338	355	6.33	5.6	6.81	-1.21	0.000161	0.00433	2.36351	Intron (FBtr0088558/FBgn0033403, intron 2 of 3)	2	9309296	9351655	42360	2	FBgn0033403	7317	35957	CG13739	uncharacterized protein	CG13739
chr3L	2615395	2615961	567	7.57	7.09	7.94	-0.84	0.00017	0.00453	2.3439	Intron (FBtr0072954/FBgn0011828, intron 1 of 8)	3	2601455	2630064	28610	2	FBgn0011828	14103	38326	Pxn	Peroxidasin	Pxn
chr2R	16453153	16454220	1068	7.74	8.07	7.32	0.76	0.000173	0.00458	2.33913	Distal Intergenic	2	16445986	16447512	1527	1	FBgn0034129	7167	36841	Parp16	Poly(ADP-ribose) polymerase family member 16	Parp16
chr3R	16476533	16477412	880	8.14	8.44	7.75	0.7	0.000174	0.00458	2.33913	Promoter	4	16477110	16481070	3961	1	FBgn0038436	0	42002	Gyc89Db	Guanylyl cyclase at 89Db	Gyc89Db
chr3L	13673293	13674540	1248	9.59	9.85	9.29	0.56	0.000175	0.00458	2.33913	Intron (FBtr0330356/FBgn0264001, intron 4 of 13)	3	13521907	13803400	281494	2	FBgn0264001	128860	39527	bru3	bruno 3	bru3
chr3R	11388957	11390112	1156	8.23	7.84	8.54	-0.7	0.000174	0.00458	2.33913	Intron (FBtr0304604/FBgn0004595, intron 5 of 6)	4	11328480	11407627	79148	1	FBgn0004595	60477	41363	pros	prospero	pros
chr3R	17247331	17247999	669	7.42	6.94	7.78	-0.84	0.000173	0.00458	2.33913	5' UTR	4	17232253	17265049	32797	2	FBgn0038494	17050	42082	beat-IIb	beaten path IIb	beat-IIb
chr3R	5123110	5123789	680	7.17	7.56	6.64	0.93	0.000189	0.00491	2.30892	Distal Intergenic	4	5128087	5129939	1853	1	FBgn0037293	-4298	40617	CG12007	uncharacterized protein	CG12007
chr2L	21028083	21029132	1050	8.15	8.44	7.78	0.67	0.000196	0.00504	2.29757	5' UTR	1	20965520	21052164	86645	2	FBgn0250867	23032	7354398	CG42238	uncharacterized protein	CG42238
chr2R	13322476	13323040	565	7.68	8.01	7.25	0.77	0.000196	0.00505	2.29671	Distal Intergenic	2	13329402	13329501	100	2	FBgn0262391	6461	NA	NA	NA	mir-184
chr3L	21142520	21143362	843	7.97	7.5	8.33	-0.83	0.000199	0.0051	2.29243	Intron (FBtr0305501/FBgn0024150, intron 4 of 16)	3	21136447	21171930	35484	2	FBgn0024150	28568	40333	Ac78C	Adenylyl cyclase 78C	Ac78C
chr2R	8179803	8180711	909	7.84	8.16	7.42	0.75	0.000208	0.00528	2.27737	Intron (FBtr0344893/FBgn0053087, intron 1 of 22)	2	8174165	8226438	52274	1	FBgn0053087	5638	35799	LRP1	LDL receptor protein 1	LRP1
chr3L	8273952	8274692	741	9.15	8.86	9.4	-0.54	0.000211	0.00534	2.27246	Exon (FBtr0299841/FBgn0263219, exon 20 of 32)	3	8238647	8282398	43752	1	FBgn0263219	35305	2769008	Dscam4	Down syndrome cell adhesion molecule 4	Dscam4
chr3L	13123873	13124168	296	5.58	4.56	6.17	-1.61	0.000211	0.00534	2.27246	Distal Intergenic	3	13114271	13118077	3807	1	FBgn0010452	9602	39491	trn	tartan	trn
chr3L	13646148	13646721	574	7.78	7.31	8.14	-0.83	0.000216	0.00542	2.266	Intron (FBtr0330351/FBgn0264001, intron 2 of 12)	3	13521907	13803400	281494	2	FBgn0264001	156679	39527	bru3	bruno 3	bru3
chr2L	514262	514974	713	8.65	8.27	8.95	-0.68	0.000221	0.0055	2.25964	Intron (FBtr0333012/FBgn0003963, intron 1 of 7)	1	476220	540560	64341	1	FBgn0003963	38042	33225	ush	u-shaped	ush
chr2R	13642970	13643573	604	7.6	7.13	7.96	-0.83	0.000229	0.00569	2.24489	Intron (FBtr0087625/FBgn0000633, intron 1 of 12)	2	13623044	13749367	126324	1	FBgn0000633	19926	36521	CG17716	uncharacterized protein	CG17716
chr3R	24432713	24433253	541	7.54	7.07	7.89	-0.81	0.000237	0.00587	2.23136	Intron (FBtr0334916/FBgn0000036, intron 2 of 9)	4	24393896	24457157	63262	2	FBgn0000036	23904	42918	nAChRalpha1	nicotinic Acetylcholine Receptor alpha1	nAChRalpha1
chr3R	7135646	7136347	702	9.18	8.88	9.42	-0.54	0.000243	0.00599	2.22257	Promoter	4	7136206	7141972	5767	1	FBgn0037475	0	2768661	Fer1	48 related 1	Fer1
chr2R	12017406	12017856	451	7.09	7.49	6.54	0.95	0.000247	0.00604	2.21896	Intron (FBtr0088028/FBgn0004839, intron 1 of 6)	2	12001473	12019846	18374	2	FBgn0004839	1990	36283	otk	off-track	otk
chr3R	11275856	11276553	698	8.01	7.63	8.32	-0.69	0.000247	0.00604	2.21896	Intron (FBtr0308921/FBgn0051386, intron 4 of 4)	4	11269415	11305608	36194	2	FBgn0051386	29055	NA	NA	NA	lncRNA:CR31386
chr2R	17313019	17313515	497	7.98	7.58	8.29	-0.71	0.000256	0.0062	2.20761	Intron (FBtr0310346/FBgn0265487, intron 3 of 9)	2	17216549	17379376	162828	1	FBgn0265487	96470	36945	mbl	muscleblind	mbl
chr3L	22360949	22361441	493	7.63	7.18	7.97	-0.8	0.000255	0.0062	2.20761	Intron (FBtr0078509/FBgn0004449, intron 1 of 8)	3	22293044	22407863	114820	2	FBgn0004449	46422	40464	Ten-m	Tenascin major	Ten-m
chr3R	6132304	6132871	568	7.52	7.06	7.87	-0.82	0.000264	0.00633	2.1986	Distal Intergenic	4	6127229	6127955	727	2	FBgn0263498	-4349	NA	NA	NA	lncRNA:CR43487
chr3R	25770795	25771401	607	7.38	6.9	7.74	-0.84	0.000264	0.00633	2.1986	Downstream (1-2kb)	4	25773334	25775369	2036	2	FBgn0039366	3968	43110	CG17198	uncharacterized protein	CG17198
chr3R	20362088	20362555	468	5.72	4.85	6.25	-1.4	0.000279	0.00667	2.17587	Distal Intergenic	4	20360308	20360634	327	1	FBgn0038790	1780	42416	MtnC	Metallothionein C	MtnC
chr3R	14017607	14018693	1087	9.09	9.34	8.78	0.56	0.00028	0.00669	2.17457	Intron (FBtr0301634/FBgn0264493, intron 2 of 8)	4	13967061	14032057	64997	2	FBgn0264493	13364	41704	rdx	roadkill	rdx
chr3R	20144928	20145323	396	6.87	6.3	7.28	-0.98	0.000296	0.007	2.1549	Distal Intergenic	4	20139148	20139921	774	2	FBgn0262025	-5007	NA	NA	NA	lncRNA:CR42836
chr3R	18834896	18835250	355	6.78	7.21	6.16	1.04	0.000305	0.00717	2.14448	Intron (FBtr0083677/FBgn0038653, intron 1 of 2)	4	18799280	18849224	49945	2	FBgn0038653	13974	42258	Octalpha2R	alpha2-adrenergic-like octopamine receptor	Octalpha2R
chr3R	15010437	15010858	422	5.96	5.17	6.47	-1.3	0.00031	0.00727	2.13847	Distal Intergenic	4	15014770	15016034	1265	1	FBgn0038280	-3912	41810	CG14861	uncharacterized protein	CG14861
chr3R	26659128	26659671	544	7.78	8.11	7.35	0.76	0.000326	0.00756	2.12148	Intron (FBtr0290328/FBgn0250908, intron 7 of 8)	4	26645282	26681966	36685	2	FBgn0250908	22295	43213	beat-VII	beaten path VII	beat-VII
chr2L	10522155	10522528	374	6.96	6.42	7.36	-0.93	0.000338	0.00776	2.11014	Distal Intergenic	1	10517335	10519269	1935	1	FBgn0010398	4820	34449	Lrr47	Leucine-rich repeat 47	Lrr47
chr3R	25378379	25378763	385	6.88	6.29	7.3	-1.01	0.000337	0.00776	2.11014	Intron (FBtr0089982/FBgn0004509, intron 4 of 11)	4	25347431	25473058	125628	2	FBgn0004509	94295	47220	Fur1	Furin 1	Fur1
chr2R	21565830	21566526	697	7	7.39	6.46	0.93	0.000352	0.008	2.09691	Intron (FBtr0071692/FBgn0034636, intron 2 of 4)	2	21560246	21576035	15790	2	FBgn0034636	9509	37456	twz	tiwaz	twz
chr2R	23278761	23280196	1436	8.33	7.98	8.61	-0.63	0.000352	0.008	2.09691	Downstream (2-3kb)	2	23271257	23275536	4280	2	FBgn0003009	-3225	37687	ord	orientation disruptor	ord
chr2L	14023794	14025993	2200	10.75	10.41	11.02	-0.61	0.000353	0.00802	2.09583	Promoter	1	14023722	14024099	378	2	FBgn0051840	0	NA	NA	NA	lncRNA:CR31840
chr3L	12842801	12843769	969	8.75	9.02	8.42	0.6	0.000356	0.00806	2.09366	Promoter	3	12824880	12843106	18227	2	FBgn0036316	0	39458	CG10960	uncharacterized protein	CG10960
chr2L	17832533	17833106	574	6.89	6.33	7.29	-0.96	0.000364	0.00822	2.08513	Intron (FBtr0303836/FBgn0262018, intron 1 of 13)	1	17786971	17875247	88277	2	FBgn0262018	42141	35071	CadN2	Cadherin-N2	CadN2
chr2R	6931155	6931404	250	6.14	5.41	6.63	-1.22	0.000365	0.00822	2.08513	Exon (FBtr0332942/FBgn0053558, exon 11 of 19)	2	6924687	6971637	46951	2	FBgn0053558	40233	2768716	mim	missing-in-metastasis	mim
chr2L	17930676	17931416	741	7.53	7.09	7.87	-0.78	0.000371	0.00833	2.07935	Distal Intergenic	1	17939019	17939715	697	2	FBgn0265549	8299	NA	NA	NA	lncRNA:CR44399
chrX	11380082	11380505	424	7.55	7.91	7.07	0.84	0.000129	0.0084	2.07572	Intron (FBtr0073483/FBgn0001624, intron 3 of 5)	6	11369665	11409776	40112	1	FBgn0001624	10417	32083	dlg1	discs large 1	dlg1
chr3R	12538484	12539148	665	8.32	8.59	7.98	0.61	0.000378	0.00846	2.07263	Intron (FBtr0290334/FBgn0250910, intron 2 of 9)	4	12511570	12548229	36660	2	FBgn0250910	9081	3885573	Octbeta3R	Octopamine beta3 receptor	Octbeta3R
chr2L	12789294	12789839	546	7.11	6.56	7.5	-0.93	0.000382	0.00854	2.06854	Distal Intergenic	1	12774054	12775252	1199	2	FBgn0284416	-14042	NA	NA	NA	lncRNA:TS9
chr2L	7422492	7422758	267	7.88	7.47	8.2	-0.73	0.000384	0.00856	2.06753	3' UTR	1	7412417	7422736	10320	1	FBgn0028387	10075	43928	chm	chameau	chm
chr3L	10854139	10854650	512	9.49	9.78	9.15	0.63	0.000391	0.00868	2.06148	Intron (FBtr0475045/FBgn0026160, intron 1 of 10)	3	10835528	10876496	40969	1	FBgn0026160	18611	39217	tna	tonalli	tna
chr2L	5932356	5932894	539	7.13	6.63	7.51	-0.88	0.000402	0.00888	2.05159	Intron (FBtr0079145/FBgn0015381, intron 3 of 4)	1	5925937	5939261	13325	1	FBgn0015381	6419	33823	dsf	dissatisfaction	dsf
chr2R	22792075	22792433	359	7.9	7.48	8.22	-0.74	0.000407	0.00898	2.04672	Intron (FBtr0299573/FBgn0259145, intron 1 of 10)	2	22740999	22798289	57291	2	FBgn0259145	5856	37614	CG42260	uncharacterized protein	CG42260
chr3R	8638406	8639045	640	6.72	7.15	6.12	1.03	0.000411	0.00903	2.04431	Distal Intergenic	4	8634320	8635878	1559	2	FBgn0026399	-2528	41018	Or85e	Odorant receptor 85e	Or85e
chr2R	14995011	14996156	1146	8.11	8.45	7.65	0.8	0.000431	0.00941	2.02641	Exon (FBtr0332258/FBgn0264378, exon 2 of 2)	2	14994559	14995195	637	1	FBgn0264378	452	NA	NA	NA	lncRNA:CR43830
chr3L	16241095	16241909	815	9.69	9.93	9.4	0.53	0.000448	0.00973	2.01189	Distal Intergenic	3	16237723	16239462	1740	1	FBgn0263608	3372	39778	l(3)72Dr	lethal (3) 72Dr	l(3)72Dr
chr2R	17075768	17076808	1041	7.98	7.56	8.3	-0.74	0.000454	0.00985	2.00656	5' UTR	2	17065971	17087633	21663	2	FBgn0050460	10825	36924	CG30460	uncharacterized protein	CG30460
chr2L	1482336	1482684	349	6.29	5.61	6.75	-1.13	0.000457	0.00987	2.00568	Distal Intergenic	1	1492295	1493859	1565	1	FBgn0051928	-9611	326175	CG31928	uncharacterized protein	CG31928
chr2L	5421567	5421975	409	8.63	8.3	8.91	-0.6	0.000462	0.00997	2.0013	Distal Intergenic	1	5431842	5432604	763	1	FBgn0263866	-9867	NA	NA	NA	lncRNA:CR43713
chr3R	15547982	15548431	450	6.44	5.77	6.89	-1.13	0.000473	0.0102	1.9914	Promoter	4	15542748	15548188	5441	2	FBgn0038349	0	41896	AOX3	Aldehyde oxidase 3	AOX3
chr2L	7423201	7423934	734	8.52	8.19	8.79	-0.6	0.000484	0.0103	1.98716	Promoter	1	7423820	7425932	2113	1	FBgn0264439	0	NA	NA	NA	lncRNA:CR43857
chr3R	12883997	12884296	300	6.28	5.61	6.74	-1.13	0.000485	0.0103	1.98716	Distal Intergenic	4	12891956	12893158	1203	1	FBgn0038089	-7660	41580	d-cup	davis-cup	d-cup
chrX	20944239	20945487	1249	8.68	8.34	8.96	-0.61	0.000167	0.0106	1.97469	Distal Intergenic	6	20934869	20939503	4635	1	FBgn0261675	9370	33072	Npc1b	Niemann-Pick type C-1b	Npc1b
chr3L	7296485	7296798	314	6.34	6.79	5.68	1.11	0.000522	0.011	1.95861	Intron (FBtr0333368/FBgn0035756, intron 2 of 12)	3	7266192	7312896	46705	2	FBgn0035756	16098	38801	unc-13-4A	unc-13-4A	unc-13-4A
chrX	19794395	19794987	593	8.97	9.26	8.62	0.63	0.000174	0.011	1.95861	Distal Intergenic	6	19786730	19788156	1427	2	FBgn0266179	-6239	NA	NA	NA	lncRNA:CR44885
chr2L	11784769	11785317	549	7.29	6.73	7.7	-0.97	0.000523	0.011	1.95861	Distal Intergenic	1	11788334	11789475	1142	1	FBgn0032374	-3017	34588	CG14931	uncharacterized protein	CG14931
chr2L	3534178	3534487	310	6.9	6.35	7.29	-0.94	0.000532	0.0112	1.95078	Distal Intergenic	1	3537844	3538333	490	1	FBgn0265367	-3357	NA	NA	NA	lncRNA:CR44308
chrX	2997457	2997678	222	6.32	5.58	6.8	-1.22	0.000181	0.0113	1.94692	Intron (FBtr0309500/FBgn0028369, intron 6 of 10)	6	2740384	3134532	394149	1	FBgn0028369	257073	31292	kirre	kin of irre	kirre
chr2L	2945330	2946133	804	8.2	8.49	7.84	0.65	0.000543	0.0114	1.9431	5' UTR	1	2885929	2954406	68478	1	FBgn0041111	59401	33496	lilli	lilliputian	lilli
chr2L	7967025	7968115	1091	8.44	8.71	8.1	0.61	0.000552	0.0115	1.9393	Intron (FBtr0112718/FBgn0085450, intron 2 of 2)	1	7891187	7984196	93010	2	FBgn0085450	16081	5740414	Snoo	Sno oncogene	Snoo
chr3R	13799974	13800456	483	9.61	9.88	9.29	0.59	0.000566	0.0118	1.92812	Distal Intergenic	4	13798198	13798270	73	2	FBgn0051331	-1704	NA	NA	NA	tRNA:Phe-GAA-1-7
chr2R	13332478	13333152	675	7.99	7.63	8.28	-0.66	0.000593	0.0122	1.91364	Intron (FBtr0346709/FBgn0265104, intron 1 of 1)	2	13329352	13344808	15457	2	FBgn0265104	11656	NA	NA	NA	lncRNA:CR44206
chr2L	10088552	10088949	398	7.01	7.39	6.5	0.89	0.000604	0.0124	1.90658	Intron (FBtr0335510/FBgn0265002, intron 8 of 20)	1	10064121	10180256	116136	2	FBgn0265002	91307	34341	CG44153	uncharacterized protein	CG44153
chr3R	13057253	13057826	574	8.54	8.23	8.79	-0.57	0.000603	0.0124	1.90658	Promoter	4	13057755	13078124	20370	1	FBgn0004666	0	41612	sim	single-minded	sim
chr2L	17293594	17294297	704	7.61	7.18	7.93	-0.75	0.000605	0.0124	1.90658	Distal Intergenic	1	17291075	17292202	1128	2	FBgn0032632	-1392	35040	CG6380	uncharacterized protein	CG6380
chr2R	9628741	9629308	568	7.78	7.39	8.08	-0.7	0.000615	0.0126	1.89963	Intron (FBtr0334807/FBgn0033438, intron 1 of 5)	2	9611139	9683858	72720	2	FBgn0033438	54550	35997	Mmp2	Matrix metalloproteinase 2	Mmp2
chr3L	8264504	8265525	1022	7.5	7	7.86	-0.87	0.000629	0.0128	1.89279	Intron (FBtr0299841/FBgn0263219, intron 8 of 31)	3	8238647	8282398	43752	1	FBgn0263219	25857	2769008	Dscam4	Down syndrome cell adhesion molecule 4	Dscam4
chr2R	23395861	23396766	906	10.05	10.28	9.77	0.51	0.000632	0.0129	1.88941	Promoter	2	23389009	23396680	7672	2	FBgn0028497	0	37707	CG3530	uncharacterized protein	CG3530
chrX	20287367	20287784	418	7.27	6.73	7.67	-0.94	0.000212	0.0129	1.88941	Distal Intergenic	6	20292047	20293407	1361	2	FBgn0267060	5623	NA	NA	NA	lncRNA:CR45504
chr2R	20459792	20460114	323	6.88	6.35	7.27	-0.91	0.000644	0.0131	1.88273	Intron (FBtr0112774/FBgn0086604, intron 4 of 15)	2	20424338	20478951	54614	1	FBgn0086604	35454	37310	side-VIII	sidestep VIII	side-VIII
chr2R	9542254	9543198	945	9.93	10.19	9.6	0.59	0.000655	0.0133	1.87615	3' UTR	2	9541947	9548135	6189	2	FBgn0033421	4937	35979	CG1888	uncharacterized protein	CG1888
chr3R	5803138	5804564	1427	10.18	10.42	9.9	0.52	0.000678	0.0137	1.86328	5' UTR	4	5802328	5813258	10931	1	FBgn0263353	810	40721	CG11000	uncharacterized protein	CG11000
chr2L	12834765	12835333	569	7.78	7.37	8.09	-0.72	0.000679	0.0137	1.86328	Distal Intergenic	1	12840895	12841323	429	1	FBgn0266305	-5562	NA	NA	NA	lncRNA:CR44970
chrX	16515170	16515833	664	8.01	7.55	8.36	-0.82	0.000227	0.0137	1.86328	Intron (FBtr0342746/FBgn0285944, intron 4 of 30)	6	16455027	16533096	78070	2	FBgn0285944	17263	32619	para	paralytic	para
chr3R	9132668	9132924	257	6.23	6.69	5.53	1.17	0.000693	0.0138	1.86012	Intron (FBtr0333668/FBgn0003165, intron 1 of 5)	4	9066343	9237682	171340	2	FBgn0003165	104758	41094	pum	pumilio	pum
chr2R	6776378	6776948	571	6.95	6.44	7.33	-0.9	0.000704	0.014	1.85387	5' UTR	2	6759715	6798941	39227	2	FBgn0085421	21993	35588	Epac	Exchange protein directly activated by cAMP	Epac
chr2R	9634250	9634584	335	7.03	6.51	7.42	-0.92	0.000705	0.014	1.85387	Intron (FBtr0334807/FBgn0033438, intron 1 of 5)	2	9611139	9683858	72720	2	FBgn0033438	49274	35997	Mmp2	Matrix metalloproteinase 2	Mmp2
chr2R	23826459	23827282	824	7.42	7.78	6.94	0.84	0.000708	0.0141	1.85078	Intron (FBtr0301162/FBgn0034911, intron 1 of 8)	2	23820354	23839864	19511	1	FBgn0034911	6105	37772	GlyT	Glycine transporter	GlyT
chr2L	7871213	7872782	1570	9.46	9.68	9.21	0.47	0.00071	0.0141	1.85078	Promoter	1	7864642	7871432	6791	2	FBgn0045038	0	250710	Proc	Proctolin	Proc
chr2L	19021423	19022208	786	9.47	9.7	9.2	0.5	0.000722	0.0142	1.84771	Downstream (2-3kb)	1	19022417	19023646	1230	1	FBgn0032740	-209	35167	CG15172	uncharacterized protein	CG15172
chr2L	3112769	3113232	464	7.05	6.54	7.43	-0.89	0.000716	0.0142	1.84771	Intron (FBtr0077662/FBgn0015600, intron 3 of 10)	1	3068345	3144786	76442	2	FBgn0015600	31554	33526	toc	toucan	toc
chr2L	14387751	14388088	338	6.42	5.8	6.86	-1.06	0.000721	0.0142	1.84771	Downstream (2-3kb)	1	14378218	14381172	2955	2	FBgn0020258	-6579	34843	ppk	pickpocket	ppk
chr3L	7204968	7205424	457	6.9	7.3	6.34	0.96	0.00073	0.0143	1.84466	Distal Intergenic	3	7159199	7189931	30733	2	FBgn0265296	-15037	38788	Dscam2	Down syndrome cell adhesion molecule 2	Dscam2
chr3L	2629989	2630467	479	8.45	8.14	8.7	-0.55	0.000735	0.0144	1.84164	Promoter	3	2601455	2630064	28610	2	FBgn0011828	0	38326	Pxn	Peroxidasin	Pxn
chr2R	18988119	18988454	336	5.94	5.18	6.43	-1.25	0.000741	0.0145	1.83863	Intron (FBtr0340449/FBgn0265356, intron 1 of 7)	2	18987344	19008944	21601	1	FBgn0265356	775	37190	tn	thin	tn
chr3R	12448992	12450089	1098	9.32	9.53	9.07	0.46	0.000765	0.0149	1.82681	Promoter	4	12449296	12456355	7060	1	FBgn0038053	0	41538	CG18549	uncharacterized protein	CG18549
chrX	13207642	13209036	1395	10.23	10.46	9.96	0.5	0.000254	0.0152	1.81816	Intron (FBtr0340488/FBgn0265630, intron 1 of 11)	6	13195499	13211674	16176	2	FBgn0265630	2638	32273	sno	strawberry notch	sno
chr3R	28129030	28129717	688	7.01	7.37	6.52	0.85	0.00079	0.0153	1.81531	Distal Intergenic	4	28137647	28137965	319	2	FBgn0267746	8248	NA	NA	NA	lncRNA:CR46077
chr3R	26773144	26774013	870	7.97	8.27	7.6	0.67	0.000793	0.0153	1.81531	Distal Intergenic	4	26769078	26769828	751	1	FBgn0267123	4066	NA	NA	NA	lncRNA:CR45563
chr3L	13830910	13831373	464	6.18	5.39	6.69	-1.3	0.000805	0.0155	1.80967	Distal Intergenic	3	13837756	13838080	325	1	FBgn0262813	-6383	12798242	CG43184	uncharacterized protein	CG43184
chr2R	23982054	23982467	414	7.44	7.76	7.02	0.74	0.00082	0.0157	1.8041	Intron (FBtr0343282/FBgn0005612, intron 1 of 1)	2	23978801	23985177	6377	1	FBgn0005612	3253	37822	Sox14	Sox box protein 14	Sox14
chr3R	6930425	6930824	400	8.29	7.97	8.55	-0.58	0.000823	0.0157	1.8041	Intron (FBtr0081648/FBgn0260642, intron 1 of 5)	4	6896253	6999228	102976	2	FBgn0260642	68404	40835	Antp	Antennapedia	Antp
chr2R	8859567	8860838	1272	9.75	9.96	9.49	0.47	0.00084	0.016	1.79588	Promoter	2	8860364	8888097	27734	1	FBgn0011286	0	49090	RyR	Ryanodine receptor	RyR
chr3L	14863310	14863930	621	7.29	7.62	6.85	0.77	0.000853	0.0161	1.79317	Intron (FBtr0110825/FBgn0036454, intron 3 of 7)	3	14805136	14882224	77089	1	FBgn0036454	58174	39616	CG17839	uncharacterized protein	CG17839
chr2R	19584107	19584523	417	7.15	6.66	7.51	-0.85	0.000888	0.0168	1.77469	Intron (FBtr0310331/FBgn0003435, intron 3 of 10)	2	19517864	19631508	113645	2	FBgn0003435	46985	37254	sm	smooth	sm
chr2L	12065512	12066155	644	7.52	7.1	7.84	-0.74	0.000905	0.0171	1.767	5' UTR	1	12063457	12066775	3319	2	FBgn0032405	620	34627	firl	firelighter	firl
chr2R	22768454	22768863	410	6.41	5.8	6.83	-1.04	0.000918	0.0173	1.76195	Intron (FBtr0299573/FBgn0259145, intron 2 of 10)	2	22740999	22798289	57291	2	FBgn0259145	29426	37614	CG42260	uncharacterized protein	CG42260
chr3L	7225306	7225888	583	8.86	9.11	8.55	0.57	0.000983	0.0183	1.73755	Distal Intergenic	3	7222717	7223898	1182	1	FBgn0266959	2589	NA	NA	NA	lncRNA:CR45410
chr2R	9368951	9369680	730	9.6	9.82	9.33	0.49	0.000986	0.0184	1.73518	Intron (FBtr0332997/FBgn0033405, intron 7 of 7)	2	9309296	9389467	80172	2	FBgn0033405	19787	35959	CG13954	uncharacterized protein	CG13954
chr3L	22637935	22638445	511	8.24	8.51	7.91	0.6	0.00103	0.0191	1.71897	Promoter	3	22573114	22637916	64803	2	FBgn0037171	-19	NA	NA	NA	CG14459
chr2R	7241209	7242175	967	8.54	8.78	8.26	0.52	0.00104	0.0191	1.71897	Downstream (<1kb)	2	7243024	7245776	2753	2	FBgn0026602	3601	44750	Ady43A	Ady43A	Ady43A
chr3L	18327956	18328430	475	6.67	6.08	7.09	-1.01	0.00104	0.0192	1.7167	Distal Intergenic	3	18323584	18323985	402	2	FBgn0286033	-3971	NA	NA	NA	lncRNA:CR46353
chr3R	10501555	10501896	342	6.16	5.5	6.61	-1.11	0.00104	0.0192	1.7167	Distal Intergenic	4	10513005	10513133	129	2	FBgn0263547	11237	NA	NA	NA	mir-4944
chr3R	15417903	15418656	754	10.02	10.31	9.67	0.64	0.00106	0.0194	1.7122	Exon (FBtr0346982/FBgn0267571, exon 1 of 1)	4	15417320	15420710	3391	2	FBgn0267571	2054	NA	NA	NA	lncRNA:CR45911
chr3L	2903132	2903529	398	7.36	7.69	6.95	0.74	0.00106	0.0195	1.70997	Intron (FBtr0333899/FBgn0262593, intron 2 of 11)	3	2895017	2959579	64563	1	FBgn0262593	8115	38352	Shab	Shaker cognate b	Shab
chr2L	11410120	11410453	334	6.13	5.42	6.6	-1.18	0.00107	0.0195	1.70997	Distal Intergenic	1	11387870	11392320	4451	2	FBgn0263764	-17800	NA	NA	NA	lncRNA:CR43681
chr3R	24498881	24499368	488	7.23	7.58	6.77	0.81	0.00108	0.0196	1.70774	Distal Intergenic	4	24488612	24488682	71	1	FBgn0262389	10269	NA	NA	NA	mir-1017
chr2R	9382570	9383689	1120	8.77	8.5	9	-0.5	0.00109	0.0197	1.70553	Intron (FBtr0332997/FBgn0033405, intron 1 of 7)	2	9309296	9389467	80172	2	FBgn0033405	5778	35959	CG13954	uncharacterized protein	CG13954
chr2R	15409424	15409951	528	6.93	6.43	7.3	-0.87	0.00108	0.0197	1.70553	5' UTR	2	15401096	15471884	70789	1	FBgn0263980	8328	5740318	Stacl	Stac-like	Stacl
chr3L	18057061	18057411	351	7.48	7.05	7.82	-0.77	0.00109	0.0198	1.70333	Intron (FBtr0306814/FBgn0000568, intron 3 of 7)	3	17950953	18064696	113744	2	FBgn0000568	7285	39999	Eip75B	Ecdysone-induced protein 75B	Eip75B
chr3L	14298683	14298948	266	6.4	5.65	6.89	-1.25	0.00109	0.0198	1.70333	Intron (FBtr0075743/FBgn0001085, intron 1 of 4)	3	14274343	14368639	94297	1	FBgn0001085	24340	45307	fz	frizzled	fz
chr2R	9543737	9544511	775	9.31	9.52	9.06	0.46	0.00111	0.0199	1.70115	3' UTR	2	9541947	9548135	6189	2	FBgn0033421	3624	35979	CG1888	uncharacterized protein	CG1888
chr2L	14546683	14547212	530	6.64	6.08	7.04	-0.96	0.0011	0.0199	1.70115	Downstream (<1kb)	1	14547498	14549109	1612	2	FBgn0250844	1897	34848	CG4218	uncharacterized protein	CG4218
chr2R	10291466	10292224	759	6.87	6.36	7.25	-0.89	0.00111	0.02	1.69897	Intron (FBtr0088338/FBgn0033504, intron 3 of 13)	2	10269016	10307024	38009	1	FBgn0033504	22450	36084	CAP	CAP	CAP
chr3L	15356495	15356819	325	6.59	6.01	7	-1	0.00112	0.02	1.69897	Distal Intergenic	3	15336692	15344315	7624	1	FBgn0036494	19803	39663	Toll-6	Toll-6	Toll-6
chr3L	17983870	17984441	572	7.39	6.94	7.72	-0.78	0.00113	0.0202	1.69465	Intron (FBtr0306814/FBgn0000568, intron 4 of 7)	3	17950953	18064696	113744	2	FBgn0000568	80255	39999	Eip75B	Ecdysone-induced protein 75B	Eip75B
chr3L	3451716	3452989	1274	8.02	7.68	8.3	-0.63	0.00114	0.0204	1.69037	Intron (FBtr0309837/FBgn0026259, intron 4 of 7)	3	3428658	3460977	32320	2	FBgn0026259	7988	44261	eIF5B	eukaryotic translation initiation factor 5B	eIF5B
chrX	3327199	3327459	261	6.56	5.93	7	-1.06	0.000381	0.0209	1.67985	Intron (FBtr0070509/FBgn0000479, intron 6 of 14)	6	3176440	3343767	167328	1	FBgn0000479	150759	31309	dnc	dunce	dnc
chr3R	23722158	23723969	1812	9.83	10.05	9.58	0.47	0.00118	0.021	1.67778	Promoter	4	23723331	23731499	8169	1	FBgn0039109	0	42801	CG10365	uncharacterized protein	CG10365
chr3L	18969189	18969485	297	6.67	6.12	7.06	-0.94	0.0012	0.0212	1.67366	Distal Intergenic	3	18979368	18979590	223	1	FBgn0267249	-9883	NA	NA	NA	lncRNA:CR45689
chr3R	15110079	15110843	765	7.54	7.86	7.13	0.72	0.00121	0.0214	1.66959	Intron (FBtr0303485/FBgn0261859, intron 2 of 9)	4	15095957	15131926	35970	2	FBgn0261859	21083	41817	CG42788	uncharacterized protein	CG42788
chr3L	19346668	19347517	850	7.1	6.59	7.48	-0.88	0.00126	0.0221	1.65561	Intron (FBtr0089796/FBgn0052206, intron 12 of 13)	3	19340321	19412912	72592	2	FBgn0052206	65395	40105	CG32206	uncharacterized protein	CG32206
chr3L	11347576	11347903	328	5.71	4.96	6.2	-1.24	0.00125	0.0221	1.65561	Downstream (1-2kb)	3	11349395	11349743	349	2	FBgn0266786	1840	NA	NA	NA	lncRNA:CR45251
chr3R	27852990	27853442	453	6.87	7.24	6.37	0.87	0.0013	0.0226	1.64589	Intron (FBtr0305292/FBgn0085382, intron 2 of 11)	4	27767966	27905843	137878	2	FBgn0085382	52401	5740590	CG34353	uncharacterized protein	CG34353
chr3L	9468626	9469498	873	9.61	9.82	9.37	0.45	0.00133	0.0231	1.63639	Intron (FBtr0343555/FBgn0266101, intron 2 of 4)	3	9461050	9475475	14426	1	FBgn0266101	7576	39099	CG44838	uncharacterized protein	CG44838
chr2L	12593770	12594623	854	9.62	9.37	9.82	-0.45	0.00133	0.0231	1.63639	5' UTR	1	12587625	12628135	40511	1	FBgn0085424	6145	34669	nub	nubbin	nub
chr3R	12854649	12855183	535	7.84	7.44	8.15	-0.71	0.00133	0.0231	1.63639	Downstream (<1kb)	4	12850380	12850668	289	2	FBgn0265165	-3981	NA	NA	NA	lncRNA:CR44234
chr2R	22263918	22264682	765	8.24	7.89	8.53	-0.64	0.00135	0.0234	1.63078	Intron (FBtr0071775/FBgn0020307, intron 2 of 5)	2	22243963	22286469	42507	1	FBgn0020307	19955	37546	dve	defective proventriculus	dve
chr3R	12812086	12812940	855	7.98	7.6	8.29	-0.68	0.00144	0.0247	1.6073	Intron (FBtr0082689/FBgn0051345, intron 2 of 4)	4	12811145	12817029	5885	2	FBgn0051345	4089	41576	CG31345	uncharacterized protein	CG31345
chr2L	11868916	11869235	320	6.62	6.08	7.02	-0.94	0.00146	0.0249	1.6038	Intron (FBtr0334140/FBgn0264815, intron 3 of 9)	1	11814156	11928572	114417	2	FBgn0264815	59337	34594	Pde1c	Phosphodiesterase 1c	Pde1c
chr2R	15888583	15889357	775	7.55	7.17	7.85	-0.68	0.00151	0.0255	1.59346	Intron (FBtr0330732/FBgn0264089, intron 2 of 19)	2	15869495	15922118	52624	2	FBgn0264089	32761	36746	sli	slit	sli
chr3R	31004610	31005100	491	7.38	6.94	7.72	-0.78	0.00152	0.0257	1.59007	Intron (FBtr0334508/FBgn0004573, intron 1 of 2)	4	30968236	31016875	48640	2	FBgn0004573	11775	43669	5-HT7	5-hydroxytryptamine (serotonin) receptor 7	5-HT7
chr3R	9184452	9185001	550	7.68	8	7.27	0.73	0.00154	0.0258	1.58838	Intron (FBtr0333667/FBgn0003165, intron 8 of 12)	4	9066343	9237682	171340	2	FBgn0003165	52681	41094	pum	pumilio	pum
chr3L	13613660	13614455	796	8.04	7.71	8.31	-0.6	0.00153	0.0258	1.58838	Intron (FBtr0330351/FBgn0264001, intron 3 of 12)	3	13521907	13803400	281494	2	FBgn0264001	188945	39527	bru3	bruno 3	bru3
chr3R	28306698	28307762	1065	7.5	7.1	7.81	-0.71	0.00155	0.0261	1.58336	Distal Intergenic	4	28303631	28304605	975	2	FBgn0039577	-2093	43370	CG12516	uncharacterized protein	CG12516
chrX	12531911	12532412	502	7.17	7.52	6.7	0.83	0.0005	0.0266	1.57512	Intron (FBtr0333156/FBgn0264542, intron 1 of 7)	6	12516634	12568452	51819	2	FBgn0264542	36040	32202	hwt	heavyweight	hwt
chr2L	20082715	20083221	507	8.36	8.63	8.02	0.62	0.00168	0.0277	1.55752	3' UTR	1	20075757	20089698	13942	1	FBgn0004374	6958	35293	neb	nebbish	neb
chr3L	21364174	21364698	525	7.09	6.63	7.43	-0.8	0.00167	0.0277	1.55752	Distal Intergenic	3	21360179	21361229	1051	1	FBgn0052440	3995	318030	CG32440	uncharacterized protein	CG32440
chr3R	6295853	6296386	534	7.01	6.56	7.35	-0.8	0.00167	0.0277	1.55752	Distal Intergenic	4	6299128	6300738	1611	1	FBgn0040279	-2742	40770	Osi14	Osiris 14	Osi14
chr3R	21612900	21613638	739	8.12	7.78	8.4	-0.62	0.0017	0.0281	1.55129	Intron (FBtr0084121/FBgn0283499, intron 1 of 12)	4	21570248	21619321	49074	2	FBgn0283499	5683	42549	InR	Insulin-like receptor	InR
chr2L	7546961	7547416	456	7.08	7.42	6.63	0.79	0.00176	0.0289	1.5391	Intron (FBtr0334850/FBgn0264895, intron 2 of 5)	1	7497805	7578980	81176	2	FBgn0264895	31564	34032	RapGAP1	Rap GTPase activating protein 1	RapGAP1
chr2R	10942298	10943099	802	7.9	7.5	8.21	-0.72	0.00177	0.0289	1.5391	Distal Intergenic	2	10938425	10941738	3314	2	FBgn0033574	-560	36163	Spn47C	Serpin 47C	Spn47C
chr3L	2614517	2614835	319	7.29	6.88	7.61	-0.74	0.00179	0.0291	1.53611	Intron (FBtr0072954/FBgn0011828, intron 1 of 8)	3	2601455	2630064	28610	2	FBgn0011828	15229	38326	Pxn	Peroxidasin	Pxn
chr3R	28960918	28961669	752	9.06	9.28	8.81	0.47	0.00183	0.0295	1.53018	Intron (FBtr0085347/FBgn0039617, intron 1 of 10)	4	28925004	28970372	45369	2	FBgn0039617	8703	43417	DIP-gamma	Dpr-interacting protein gamma	DIP-gamma
chr3L	18066419	18067066	648	9.31	9.53	9.05	0.48	0.00186	0.0301	1.52143	Downstream (1-2kb)	3	17950953	18064696	113744	2	FBgn0000568	-1723	39999	Eip75B	Ecdysone-induced protein 75B	Eip75B
chrX	20704823	20705473	651	8.39	8.06	8.65	-0.59	0.000589	0.0305	1.5157	Distal Intergenic	6	20690670	20697321	6652	1	FBgn0003300	14153	33059	run	runt	run
chrX	14414991	14415401	411	6.97	6.46	7.35	-0.89	0.000617	0.0315	1.50169	Intron (FBtr0073913/FBgn0052600, intron 5 of 9)	6	14322226	14462351	140126	1	FBgn0052600	92765	32387	dpr8	defective proboscis extension response 8	dpr8
chr3R	24071077	24072039	963	8.71	8.93	8.45	0.48	0.00198	0.0318	1.49757	Intron (FBtr0084587/FBgn0053100, intron 2 of 3)	4	24063077	24108960	45884	2	FBgn0053100	36921	326255	eIF4EHP	eukaryotic translation initiation factor 4E homologous protein	eIF4EHP
chr2R	16477974	16478588	615	7.29	6.88	7.61	-0.73	0.00198	0.0318	1.49757	Distal Intergenic	2	16484841	16485552	712	2	FBgn0034131	6964	36843	CG15712	uncharacterized protein	CG15712
chr3R	10272584	10273263	680	7.28	6.87	7.6	-0.73	0.002	0.032	1.49485	Intron (FBtr0305354/FBgn0262617, intron 1 of 12)	4	10264306	10308467	44162	1	FBgn0262617	8278	41256	Nuak1	Nuak1 ortholog	Nuak1
chr2L	34798	35152	355	6.78	7.16	6.27	0.89	0.00202	0.0321	1.49349	Exon (FBtr0078163/FBgn0051973, exon 5 of 13)	1	25402	65404	40003	2	FBgn0051973	30252	33158	Cda5	Chitin deacetylase-like 5	Cda5
chr3L	11884695	11885001	307	6.4	6.84	5.76	1.08	0.00203	0.0322	1.49214	Intron (FBtr0343552/FBgn0266100, intron 2 of 3)	3	11850645	11938872	88228	2	FBgn0266100	53871	5740513	CG44837	uncharacterized protein	CG44837
chr3R	18520103	18520733	631	7.28	6.84	7.62	-0.78	0.00207	0.0328	1.48413	Intron (FBtr0083644/FBgn0004652, intron 1 of 7)	4	18414273	18545586	131314	2	FBgn0004652	24853	42226	fru	fruitless	fru
chr2R	6858354	6859119	766	7.24	6.79	7.59	-0.8	0.00211	0.0332	1.47886	Downstream (2-3kb)	2	6862001	6872718	10718	2	FBgn0265935	13599	35596	coro	coro	coro
chr4	1250758	1251257	500	6.88	7.24	6.42	0.82	0.00218	0.0339	1.4698	Exon (FBtr0333702/FBgn0053653, exon 17 of 23)	5	1230837	1271759	40923	1	FBgn0053653	19921	NA	NA	NA	Cadps
chr2R	19207079	19207456	378	6.42	5.86	6.83	-0.96	0.00217	0.0339	1.4698	Intron (FBtr0086503/FBgn0263395, intron 2 of 14)	2	19178738	19227193	48456	1	FBgn0263395	28341	37203	hppy	happyhour	hppy
chr3R	20282887	20283270	384	7.44	7.78	7.01	0.77	0.00225	0.0348	1.45842	Intron (FBtr0305029/FBgn0262582, intron 2 of 18)	4	20252770	20303942	51173	1	FBgn0262582	30117	53560	cic	capicua	cic
chr2L	10926519	10926895	377	7.01	6.54	7.37	-0.83	0.00228	0.0352	1.45346	Intron (FBtr0340553/FBgn0261871, intron 2 of 7)	1	10917015	10964153	47139	2	FBgn0261871	37258	3346227	dpr2	defective proboscis extension response 2	dpr2
chr2R	10918184	10918918	735	9.07	8.8	9.29	-0.49	0.00232	0.0356	1.44855	Distal Intergenic	2	10909923	10910485	563	1	FBgn0033573	8261	36162	Obp47a	Odorant-binding protein 47a	Obp47a
chr2R	11596615	11598133	1519	10.89	11.21	10.48	0.73	0.00234	0.0357	1.44733	Intron (FBtr0333071/FBgn0033636, intron 2 of 15)	2	11577485	11616045	38561	2	FBgn0033636	17912	36241	tou	toutatis	tou
chr2L	15013419	15014045	627	9.73	9.97	9.42	0.55	0.00238	0.0362	1.44129	Distal Intergenic	1	15011815	15012667	853	2	FBgn0264438	-752	NA	NA	NA	lncRNA:CR43856
chr3R	19575184	19575430	247	5.95	5.31	6.39	-1.08	0.00241	0.0367	1.43533	Intron (FBtr0110917/FBgn0260003, intron 25 of 33)	4	19461085	19597288	136204	1	FBgn0260003	114099	42327	Dys	Dystrophin	Dys
chr3R	11522785	11523234	450	8	8.25	7.69	0.57	0.0025	0.0378	1.42251	Distal Intergenic	4	11535495	11536273	779	1	FBgn0266416	-12261	NA	NA	NA	asRNA:CR45056
chr3R	9982433	9982723	291	8.01	8.29	7.67	0.61	0.00255	0.0384	1.41567	Intron (FBtr0112576/FBgn0267336, intron 5 of 6)	4	9874681	9995364	120684	1	FBgn0267336	107752	41217	Glut4EF	Glucose transporter 4 enhancer factor	Glut4EF
chr3R	6530728	6531155	428	6.44	5.9	6.84	-0.93	0.00269	0.0401	1.39686	3' UTR	4	6529169	6593330	64162	2	FBgn0053202	62175	40800	dpr11	defective proboscis extension response 11	dpr11
chr3L	22997947	22999183	1237	8.9	8.66	9.11	-0.45	0.00272	0.0404	1.39362	Promoter	3	22998372	23040300	41929	1	FBgn0262509	0	40515	nrm	neuromusculin	nrm
chr2R	19049992	19050912	921	7.88	7.56	8.15	-0.59	0.00273	0.0405	1.39254	Distal Intergenic	2	19055231	19055924	694	2	FBgn0034415	5012	37194	CG15116	uncharacterized protein	CG15116
chr3R	24433637	24434046	410	7.26	6.86	7.58	-0.72	0.00275	0.0406	1.39147	Intron (FBtr0334916/FBgn0000036, intron 2 of 9)	4	24393896	24457157	63262	2	FBgn0000036	23111	42918	nAChRalpha1	nicotinic Acetylcholine Receptor alpha1	nAChRalpha1
chr2R	10702645	10703227	583	7.18	6.78	7.49	-0.72	0.00286	0.0419	1.37779	Intron (FBtr0304900/FBgn0024836, intron 2 of 5)	2	10673345	10721138	47794	1	FBgn0024836	29300	36125	stan	starry night	stan
chr3R	11855392	11855956	565	7.63	7.92	7.28	0.64	0.00288	0.042	1.37675	Intron (FBtr0082517/FBgn0037956, intron 1 of 2)	4	11822702	11869460	46759	2	FBgn0037956	13504	41434	CG6959	uncharacterized protein	CG6959
chrX	17962787	17963956	1170	10.4	10.66	10.09	0.57	0.000873	0.0427	1.36957	Intron (FBtr0089658/FBgn0003380, intron 2 of 12)	6	17924307	18063247	138941	2	FBgn0003380	99291	32780	Sh	Shaker	Sh
chr2R	9056451	9057227	777	8.57	8.3	8.79	-0.49	0.00301	0.0436	1.36051	Exon (FBtr0088662/FBgn0033368, exon 3 of 11)	2	9044850	9060608	15759	2	FBgn0033368	3381	35911	CG13743	uncharacterized protein	CG13743
chr2L	5787203	5787454	252	6.38	5.85	6.77	-0.92	0.00305	0.0439	1.35754	Intron (FBtr0301235/FBgn0031738, intron 3 of 7)	1	5767002	5800253	33252	2	FBgn0031738	12799	33807	CG9171	uncharacterized protein	CG9171
chrX	8290088	8290488	401	6.73	7.13	6.18	0.95	0.000929	0.0448	1.34872	Intron (FBtr0339652/FBgn0015519, intron 7 of 11)	6	8276200	8367169	90970	2	FBgn0015519	76681	31767	nAChRalpha3	nicotinic Acetylcholine Receptor alpha3	nAChRalpha3
chr2L	21617399	21619432	2034	9.74	9.93	9.52	0.41	0.0032	0.0458	1.33913	5' UTR	1	21614232	21624080	9849	2	FBgn0032955	4648	35417	CG2201	uncharacterized protein	CG2201
chr2L	11551024	11551669	646	7.19	6.77	7.51	-0.74	0.00323	0.0461	1.3363	Distal Intergenic	1	11548640	11550035	1396	2	FBgn0265687	-989	NA	NA	NA	lncRNA:CR44494
chr3L	10549958	10550593	636	7.95	7.63	8.22	-0.59	0.00331	0.047	1.3279	Intron (FBtr0305097/FBgn0052062, intron 2 of 13)	3	10481412	10594012	112601	1	FBgn0052062	68546	39198	Rbfox1	RNA-binding Fox protein 1	Rbfox1
chr2R	12200393	12202103	1711	9.46	9.66	9.23	0.43	0.00345	0.0487	1.31247	Promoter	2	12199024	12200815	1792	2	FBgn0033699	0	36321	RpS11	Ribosomal protein S11	RpS11
chr2R	16549177	16549392	216	7.17	6.78	7.48	-0.71	0.00344	0.0487	1.31247	Distal Intergenic	2	16552258	16558486	6229	1	FBgn0034135	-2866	36848	Syn2	Syntrophin-like 2	Syn2
chr3L	7745963	7747801	1839	9.4	9.59	9.18	0.41	0.0035	0.0493	1.30715	Promoter	3	7747344	7750552	3209	1	FBgn0035816	0	38869	CG13685	uncharacterized protein	CG13685
chr2R	7373916	7374220	305	6.69	7.11	6.1	1.02	0.00353	0.0496	1.30452	Intron (FBtr0334801/FBgn0033159, intron 2 of 21)	2	7317924	7381899	63976	2	FBgn0033159	7679	35652	Dscam1	Down syndrome cell adhesion molecule 1	Dscam1
chr2L	14128317	14128864	548	7.53	7.17	7.82	-0.65	0.00354	0.0496	1.30452	Intron (FBtr0445730/FBgn0283651, intron 4 of 7)	1	14104090	14160587	56498	1	FBgn0283651	24227	34829	CG46301	uncharacterized protein	CG46301
chr2L	2334845	2335273	429	6.98	6.54	7.32	-0.78	0.00354	0.0496	1.30452	Intron (FBtr0344662/FBgn0031414, intron 3 of 13)	1	2308761	2357356	48596	2	FBgn0031413	22083	33414	CG9967	uncharacterized protein	CG9967
chrX	15245772	15246472	701	7.92	7.57	8.21	-0.64	0.00107	0.0498	1.30277	Distal Intergenic	6	15243859	15244913	1055	2	FBgn0030623	-859	32453	PPYR1	Protein phosphatase Y regulator 1	PPYR1

## Sheet: malefruplus vs malefruminus
seqnames	start	end	width	Conc	Conc_MaleFruMinus	Conc_MaleFruPlus	Fold	p.value	FDR	logFDR	annotation	geneChr	geneStart	geneEnd	geneLength	geneStrand	geneId	distanceToTSS	ENTREZID	SYMBOL	GENENAME	GeneID
chr2L	17584857	17585348	492	7.89	8.46	6.95	1.51	8.59e-12	3.86e-09	8.41341	Promoter	1	17584725	17585095	371	2	FBgn0266587	0	NA	NA	NA	lncRNA:CR45112
chr3R	22306394	22306919	526	6.91	7.49	5.9	1.59	4.16e-08	3.82e-06	5.41794	Downstream (1-2kb)	4	22298805	22304420	5616	1	FBgn0038938	7589	42606	CG7084	uncharacterized protein	CG7084
chr2R	14071716	14072637	922	7.49	7.94	6.82	1.12	9.43e-06	0.000304	3.51713	Intron (FBtr0339764/FBgn0040752, intron 3 of 10)	2	14060456	14140902	80447	2	FBgn0040752	68265	50225	Prosap	prosap	Prosap
chr3L	14682791	14683182	392	6.64	7.15	5.84	1.31	2.2e-05	0.000639	3.1945	Intron (FBtr0299649/FBgn0259175, intron 2 of 9)	3	14672839	14747868	75030	1	FBgn0259175	9952	44297	ome	omega	ome
chr3L	11358753	11359167	415	7.61	8.1	6.88	1.21	6.61e-07	3.76e-05	4.42481	Downstream (2-3kb)	3	11364683	11365897	1215	1	FBgn0266396	-5516	NA	NA	NA	lncRNA:CR45036
chrX	2323764	2324237	474	7.56	8.03	6.85	1.18	1.22e-06	6.01e-05	4.22113	Intron (FBtr0344007/FBgn0003079, intron 2 of 6)	6	2295466	2343870	48405	1	FBgn0003079	28298	31221	Raf	Raf oncogene	Raf
chr2R	15705519	15706060	542	7.04	7.64	6.01	1.63	8.58e-10	1.89e-07	6.72354	Distal Intergenic	2	15698726	15701696	2971	2	FBgn0286939	-3823	NA	NA	NA	NA
chr3L	18651715	18652081	367	6.54	7.06	5.72	1.33	1.08e-05	0.000342	3.46597	Intron (FBtr0075049/FBgn0036801, intron 2 of 8)	3	18625959	18667177	41219	1	FBgn0036801	25756	40032	MYPT-75D	MYPT-75D	MYPT-75D
chrX	18035505	18036163	659	6.8	7.29	6.07	1.22	2.81e-05	0.000783	3.10624	Intron (FBtr0089661/FBgn0003380, intron 3 of 13)	6	17924307	18063247	138941	2	FBgn0003380	27084	32780	Sh	Shaker	Sh
chr3R	19714030	19714382	353	6.7	7.23	5.85	1.38	3.65e-06	0.00015	3.82391	Downstream (<1kb)	4	19715186	19715927	742	2	FBgn0085315	1545	5740178	CG34286	uncharacterized protein	CG34286
chr3R	26859103	26860007	905	8.86	9.3	8.24	1.05	3.15e-11	1.24e-08	7.90658	Intron (FBtr0334310/FBgn0051072, intron 9 of 17)	4	26842462	26863130	20669	2	FBgn0051072	3123	43223	Lerp	lysosomal enzyme receptor protein	Lerp
chr2L	12891396	12892190	795	7.37	7.73	6.89	0.84	0.000414	0.00666	2.17653	Distal Intergenic	1	12912530	12916774	4245	1	FBgn0040508	-20340	34689	ACXC	Adenylyl cyclase X C	ACXC
chr2R	10696368	10697062	695	7.65	8.08	7.05	1.03	2.44e-06	0.000106	3.97469	Intron (FBtr0304900/FBgn0024836, intron 2 of 5)	2	10673345	10721138	47794	1	FBgn0024836	23023	36125	stan	starry night	stan
chr3L	5977459	5977882	424	7.15	7.7	6.26	1.44	9.27e-08	7.37e-06	5.13253	Distal Intergenic	3	5967545	5976007	8463	2	FBgn0035656	-1452	38674	CG10479	uncharacterized protein	CG10479
chr2R	20800938	20801590	653	7.29	7.64	6.83	0.81	0.00068	0.00983	2.00745	Distal Intergenic	2	20792982	20793795	814	1	FBgn0034551	7956	37354	CG15225	uncharacterized protein	CG15225
chrX	9842046	9842604	559	6.71	7.23	5.88	1.35	5.92e-06	0.000216	3.66555	Intron (FBtr0346170/FBgn0052698, intron 5 of 8)	6	9783223	9855449	72227	1	FBgn0052698	58823	31915	CARPB	Carbonic anhydrase-related protein B	CARPB
chr2L	12910528	12911689	1162	8.47	8.99	7.63	1.36	4.7e-13	4.1e-10	9.38722	Distal Intergenic	1	12912530	12916774	4245	1	FBgn0040508	-841	34689	ACXC	Adenylyl cyclase X C	ACXC
chr2L	2925122	2925937	816	7.57	8.01	6.93	1.08	1.53e-06	7.21e-05	4.14206	5' UTR	1	2885929	2954406	68478	1	FBgn0041111	39193	33496	lilli	lilliputian	lilli
chr2L	3245954	3246707	754	7.79	8.22	7.16	1.06	2.7e-06	0.000115	3.9393	Distal Intergenic	1	3260973	3261281	309	2	FBgn0266876	14574	NA	NA	NA	lncRNA:CR45337
chr2R	19780436	19781599	1164	8.23	8.71	7.5	1.21	3.65e-10	1.08e-07	6.96658	Downstream (1-2kb)	2	19783484	19784043	560	2	FBgn0034474	2444	37270	Obp56g	Odorant-binding protein 56g	Obp56g
chr3R	12831017	12831908	892	7.58	7.93	7.13	0.8	0.00121	0.0154	1.81248	Downstream (2-3kb)	4	12833127	12833725	599	1	FBgn0267937	-1219	NA	NA	NA	lncRNA:CR46217
chr2L	17514070	17514432	363	6.36	6.8	5.72	1.08	0.00074	0.0105	1.97881	Intron (FBtr0304742/FBgn0013810, intron 16 of 22)	1	17501401	17525515	24115	1	FBgn0013810	12669	35061	Dhc36C	Dynein heavy chain at 36C	Dhc36C
chr2R	11051916	11052219	304	6.75	7.23	6.03	1.2	7.11e-05	0.00159	2.7986	Intron (FBtr0333066/FBgn0040765, intron 2 of 4)	2	10977956	11116378	138423	2	FBgn0040765	64159	2768719	luna	luna	luna
chr3L	10109632	10110919	1288	8	8.34	7.54	0.81	0.000443	0.007	2.1549	Intron (FBtr0332665/FBgn0040823, intron 6 of 6)	3	9974651	10139360	164710	1	FBgn0040823	134981	50296	dpr6	defective proboscis extension response 6	dpr6
chr2R	18372965	18375373	2409	9.87	10.17	9.49	0.68	2.44e-07	1.66e-05	4.77989	Distal Intergenic	2	18377487	18378196	710	1	FBgn0261700	-2114	NA	NA	NA	lncRNA:CR42736
chr3L	19150874	19151457	584	7.7	8.14	7.07	1.07	8.95e-07	4.83e-05	4.31605	Intron (FBtr0332735/FBgn0016797, intron 2 of 2)	3	19140975	19235373	94399	2	FBgn0016797	83916	40090	fz2	frizzled 2	fz2
chr3L	5989745	5990150	406	7	7.43	6.38	1.05	0.000362	0.00595	2.22548	Distal Intergenic	3	5984120	5984340	221	2	FBgn0266989	-5405	NA	NA	NA	lncRNA:CR45440
chr2L	17920950	17922108	1159	7.99	8.33	7.54	0.8	0.000298	0.00512	2.29073	Distal Intergenic	1	17918552	17919131	580	2	FBgn0262963	-1819	NA	NA	NA	lncRNA:CR43274
chr2R	18321702	18322263	562	8.02	8.45	7.41	1.04	5.19e-06	0.000198	3.70333	Intron (FBtr0301550/FBgn0285917, intron 2 of 11)	2	18278198	18357296	79099	2	FBgn0285917	35033	44027	sbb	scribbler	sbb
chr2R	19210302	19210755	454	7.12	7.49	6.62	0.87	0.00105	0.0139	1.85699	Intron (FBtr0086503/FBgn0263395, intron 2 of 14)	2	19178738	19227193	48456	1	FBgn0263395	31564	37203	hppy	happyhour	hppy
chr2R	24226087	24226711	625	8.13	8.61	7.39	1.23	1.81e-09	3.13e-07	6.50446	Intron (FBtr0072275/FBgn0050419, intron 1 of 1)	2	24212491	24229795	17305	2	FBgn0050419	3084	37879	CG30419	uncharacterized protein	CG30419
chr2L	13471366	13471899	534	7.02	7.38	6.53	0.85	0.00127	0.0159	1.7986	Intron (FBtr0308949/FBgn0263354, intron 3 of 8)	1	13415431	13500427	84997	1	FBgn0263354	55935	326165	CG42784	uncharacterized protein	CG42784
chr2L	8791787	8792327	541	7.64	8.11	6.93	1.18	8.39e-06	0.00028	3.55284	Distal Intergenic	1	8781799	8782500	702	2	FBgn0261627	-9287	10178945	CG42710	uncharacterized protein	CG42710
chr2L	20591511	20592183	673	7.82	8.31	7.08	1.24	5.47e-09	7.17e-07	6.14448	Intron (FBtr0343861/FBgn0266214, intron 3 of 4)	1	20583656	20626206	42551	2	FBgn0266214	34023	NA	NA	NA	lncRNA:CR44909
chr2R	10546843	10547340	498	7.48	7.91	6.85	1.06	0.000116	0.0024	2.61979	Promoter	2	10544925	10547260	2336	2	FBgn0283426	0	NA	NA	NA	lncRNA:acal
chr3L	8002491	8002949	459	7.08	7.56	6.36	1.2	5.62e-06	0.000207	3.68403	Intron (FBtr0076755/FBgn0011817, intron 2 of 8)	3	7979046	8054147	75102	1	FBgn0011817	23445	38890	nmo	nemo	nmo
chr3R	9132580	9132972	393	7.02	7.6	6.03	1.57	2.18e-08	2.29e-06	5.64016	Intron (FBtr0333668/FBgn0003165, intron 1 of 5)	4	9066343	9237682	171340	2	FBgn0003165	104710	41094	pum	pumilio	pum
chr3R	5696290	5696783	494	8.15	8.53	7.62	0.92	5.33e-06	0.000201	3.6968	Intron (FBtr0302091/FBgn0261261, intron 2 of 9)	4	5685855	5712837	26983	1	FBgn0261261	10435	40704	plx	pollux	plx
chr3R	12579039	12579814	776	7.79	8.29	7.01	1.29	1.11e-09	2.27e-07	6.64397	Intron (FBtr0304846/FBgn0038063, intron 1 of 6)	4	12550625	12595725	45101	2	FBgn0038063	15911	41549	Octbeta2R	Octopamine beta2 receptor	Octbeta2R
chr3R	27758523	27759096	574	7.6	7.92	7.21	0.71	0.00172	0.0201	1.6968	Distal Intergenic	4	27736538	27748366	11829	1	FBgn0005659	21985	43334	Ets98B	Ets at 98B	Ets98B
chr3L	7296335	7296838	504	6.91	7.29	6.4	0.89	0.00206	0.0233	1.63264	Intron (FBtr0333368/FBgn0035756, intron 2 of 12)	3	7266192	7312896	46705	2	FBgn0035756	16058	38801	unc-13-4A	unc-13-4A	unc-13-4A
chr3L	11439243	11439652	410	7.07	7.44	6.57	0.87	0.0011	0.0144	1.84164	Distal Intergenic	3	11435650	11436206	557	1	FBgn0265741	3593	NA	NA	NA	lncRNA:CR44548
chr3L	704781	705405	625	7.16	7.48	6.76	0.72	0.00529	0.0485	1.31426	Promoter	3	705330	705723	394	1	FBgn0265707	0	NA	NA	NA	lncRNA:CR44514
chr3R	18896777	18897183	407	7.2	7.6	6.64	0.95	0.000118	0.00244	2.61261	Downstream (2-3kb)	4	18898121	18899342	1222	1	FBgn0038655	-938	42260	CG14297	uncharacterized protein	CG14297
chrX	12184285	12184866	582	7.43	7.78	6.98	0.8	0.000626	0.00931	2.03105	Intron (FBtr0346335/FBgn0267001, intron 3 of 19)	6	12043698	12335214	291517	1	FBgn0267001	140587	32183	Ten-a	Tenascin accessory	Ten-a
chr2L	180929	181863	935	9.7	10.09	9.18	0.91	7.15e-10	1.73e-07	6.76195	Intron (FBtr0078122/FBgn0016977, intron 2 of 11)	1	159032	203397	44366	1	FBgn0016977	21897	44205	spen	split ends	spen
chr3L	11884648	11885130	483	7.11	7.58	6.41	1.17	6.72e-05	0.00151	2.82102	Intron (FBtr0343552/FBgn0266100, intron 2 of 3)	3	11850645	11938872	88228	2	FBgn0266100	53742	5740513	CG44837	uncharacterized protein	CG44837
chr3R	26739862	26741088	1227	8.18	8.56	7.66	0.9	3.6e-06	0.000149	3.82681	Distal Intergenic	4	26737610	26738593	984	1	FBgn0039454	2252	43221	CG14247	uncharacterized protein	CG14247
chr3L	22446491	22446867	377	7.02	7.45	6.41	1.04	8.3e-05	0.00182	2.73993	Distal Intergenic	3	22454373	22455989	1617	1	FBgn0037162	-7506	40467	CG11449	uncharacterized protein	CG11449
chr3R	17710796	17711673	878	9.81	10.23	9.2	1.03	1.43e-11	6.15e-09	8.21112	Intron (FBtr0089581/FBgn0261885, intron 2 of 15)	4	17687818	17718350	30533	2	FBgn0261885	6677	42130	osa	osa	osa
chr3R	13252415	13253016	602	7.7	7.98	7.34	0.64	0.00452	0.0431	1.36552	Intron (FBtr0335223/FBgn0000024, intron 1 of 9)	4	13222951	13259517	36567	2	FBgn0000024	6501	41625	Ace	Acetylcholine esterase	Ace
chr3R	19204136	19205362	1227	8.38	8.76	7.85	0.91	4.95e-07	2.96e-05	4.52871	Distal Intergenic	4	19212154	19215442	3289	1	FBgn0025680	-6792	42305	cry	cryptochrome	cry
chr3R	22717237	22717870	634	7.69	8.09	7.15	0.94	7.5e-05	0.00167	2.77728	Exon (FBtr0310426/FBgn0051151, exon 3 of 11)	4	22710883	22721150	10268	2	FBgn0051151	3280	42687	wge	winged eye	wge
chrX	11239509	11240377	869	7.65	8.07	7.05	1.02	1.05e-05	0.000333	3.47756	Intron (FBtr0340338/FBgn0265595, intron 3 of 6)	6	11219379	11302783	83405	2	FBgn0265595	62406	32063	CG44422	uncharacterized protein	CG44422
chr2R	13008118	13008854	737	7.85	8.3	7.2	1.11	5.44e-06	0.000203	3.6925	Distal Intergenic	2	12996501	13007911	11411	1	FBgn0265623	11617	36432	Su(z)2	Suppressor of zeste 2	Su(z)2
chr3R	12099596	12100544	949	7.82	8.24	7.23	1	1.39e-06	6.66e-05	4.17653	Intron (FBtr0082542/FBgn0051361, intron 2 of 6)	4	12094876	12111420	16545	1	FBgn0051361	4720	41470	dpr17	defective proboscis extension response 17	dpr17
chr3R	18834891	18835303	413	7.23	7.66	6.62	1.04	0.000146	0.0029	2.5376	Intron (FBtr0083677/FBgn0038653, intron 1 of 2)	4	18799280	18849224	49945	2	FBgn0038653	13921	42258	Octalpha2R	alpha2-adrenergic-like octopamine receptor	Octalpha2R
chr3R	5606256	5607131	876	8.27	8.6	7.84	0.77	0.000351	0.00583	2.23433	Promoter	4	5603236	5606543	3308	2	FBgn0261004	0	40682	asl	asterless	asl
chr3R	8638414	8639157	744	7.27	7.69	6.67	1.02	4.32e-05	0.00109	2.96257	Distal Intergenic	4	8634320	8635878	1559	2	FBgn0026399	-2536	41018	Or85e	Odorant receptor 85e	Or85e
chr2R	7373913	7374328	416	7.19	7.59	6.62	0.97	0.00144	0.0175	1.75696	Intron (FBtr0334801/FBgn0033159, intron 2 of 21)	2	7317924	7381899	63976	2	FBgn0033159	7571	35652	Dscam1	Down syndrome cell adhesion molecule 1	Dscam1
chrX	1620101	1620946	846	8.31	8.69	7.79	0.9	5.5e-05	0.0013	2.88606	Intron (FBtr0303564/FBgn0283451, intron 1 of 7)	6	1523554	1668788	145235	2	FBgn0025390	47842	31111	Mur2B	Mucin related 2B	Mur2B
chr2L	1312051	1312741	691	7.99	8.43	7.36	1.08	4.39e-07	2.66e-05	4.57512	Distal Intergenic	1	1329161	1329993	833	1	FBgn0011294	-16420	33317	a5	antennal protein 5	a5
chr2L	12359776	12360665	890	7.66	7.97	7.28	0.69	0.00206	0.0233	1.63264	Intron (FBtr0304856/FBgn0262475, intron 4 of 9)	1	12344219	12397528	53310	1	FBgn0262475	15557	250811	bru2	bruno 2	bru2
chr3L	15375014	15375415	402	8.06	8.47	7.49	0.99	5.65e-07	3.34e-05	4.47625	Distal Intergenic	3	15407832	15408267	436	1	FBgn0036495	-32417	2768950	CG33259	uncharacterized protein	CG33259
chr3L	7205057	7205424	368	7.06	7.42	6.58	0.84	0.00315	0.0329	1.4828	Distal Intergenic	3	7159199	7189931	30733	2	FBgn0265296	-15126	38788	Dscam2	Down syndrome cell adhesion molecule 2	Dscam2
chr2R	12017461	12017846	386	7.25	7.58	6.82	0.76	0.00226	0.0251	1.60033	Intron (FBtr0088028/FBgn0004839, intron 1 of 6)	2	12001473	12019846	18374	2	FBgn0004839	2000	36283	otk	off-track	otk
chrX	8290118	8290450	333	6.51	6.93	5.91	1.02	0.00111	0.0144	1.84164	Intron (FBtr0339652/FBgn0015519, intron 7 of 11)	6	8276200	8367169	90970	2	FBgn0015519	76719	31767	nAChRalpha3	nicotinic Acetylcholine Receptor alpha3	nAChRalpha3
chr2R	21565791	21566426	636	7.14	7.5	6.66	0.84	0.000759	0.0107	1.97062	Intron (FBtr0071692/FBgn0034636, intron 2 of 4)	2	21560246	21576035	15790	2	FBgn0034636	9609	37456	twz	tiwaz	twz
chr3R	5122932	5123704	773	7.47	7.83	7.01	0.81	0.00043	0.00689	2.16178	Distal Intergenic	4	5128087	5129939	1853	1	FBgn0037293	-4383	40617	CG12007	uncharacterized protein	CG12007
chr3R	8913820	8914487	668	7.51	7.95	6.88	1.06	7.65e-06	0.00026	3.58503	Intron (FBtr0305301/FBgn0262614, intron 1 of 13)	4	8827068	8931896	104829	2	FBgn0262614	17409	41062	pyd	polychaetoid	pyd
chr2L	1349369	1350129	761	8.53	9.07	7.67	1.4	1.02e-13	1.38e-10	9.86012	Downstream (1-2kb)	1	1351728	1352868	1141	2	FBgn0031332	2739	33320	CG5556	uncharacterized protein	CG5556
chr2L	14142020	14142644	625	8.58	8.91	8.15	0.76	9.17e-05	0.00198	2.70333	Intron (FBtr0445730/FBgn0283651, intron 4 of 7)	1	14104090	14160587	56498	1	FBgn0283651	37930	34829	CG46301	uncharacterized protein	CG46301
chr3L	5635184	5635966	783	8.62	8.93	8.22	0.71	0.000111	0.00232	2.63451	Intron (FBtr0077089/FBgn0035625, intron 1 of 4)	3	5630983	5652094	21112	1	FBgn0035625	4201	38638	Blimp-1	Blimp-1	Blimp-1
chrX	18426324	18426659	336	6.65	7.1	5.99	1.11	0.000758	0.0107	1.97062	3' UTR	6	18422413	18427001	4589	1	FBgn0259223	3911	32825	CG42323	uncharacterized protein	CG42323
chr2L	34741	35158	418	7.27	7.69	6.67	1.02	0.000229	0.00414	2.383	Exon (FBtr0078163/FBgn0051973, exon 5 of 13)	1	25402	65404	40003	2	FBgn0051973	30246	33158	Cda5	Chitin deacetylase-like 5	Cda5
chr2L	10088586	10088975	390	7.28	7.61	6.84	0.77	0.00234	0.0257	1.59007	Intron (FBtr0335510/FBgn0265002, intron 8 of 20)	1	10064121	10180256	116136	2	FBgn0265002	91281	34341	CG44153	uncharacterized protein	CG44153
chr3L	6503792	6504781	990	8.35	8.63	7.99	0.64	0.00405	0.0398	1.40012	Intron (FBtr0076968/FBgn0020251, intron 1 of 6)	3	6495680	6550104	54425	1	FBgn0020251	8112	38736	sfl	sulfateless	sfl
chrX	6338814	6339836	1023	8.47	8.84	7.97	0.87	7.69e-06	0.00026	3.58503	5' UTR	6	6337762	6343731	5970	1	FBgn0029866	1052	31576	CG3842	uncharacterized protein	CG3842
chr2R	21733747	21734467	721	7.69	7.99	7.32	0.68	0.00489	0.0457	1.34008	Distal Intergenic	2	21727495	21728195	701	2	FBgn0265963	-5552	NA	NA	NA	lncRNA:CR44750
chr2R	6772148	6772971	824	8.54	8.77	8.26	0.51	0.00325	0.0335	1.47496	Intron (FBtr0329849/FBgn0085421, intron 5 of 19)	2	6759715	6798941	39227	2	FBgn0085421	25970	35588	Epac	Exchange protein directly activated by cAMP	Epac
chr3R	27852971	27853497	527	7.33	7.7	6.83	0.87	0.000304	0.00522	2.28233	Intron (FBtr0305292/FBgn0085382, intron 2 of 11)	4	27767966	27905843	137878	2	FBgn0085382	52346	5740590	CG34353	uncharacterized protein	CG34353
chr3R	28128818	28129142	325	6.74	7.19	6.09	1.1	0.000449	0.00704	2.15243	Distal Intergenic	4	28137647	28137965	319	2	FBgn0267746	8823	NA	NA	NA	lncRNA:CR46077
chr2R	19021756	19022541	786	8.37	8.63	8.05	0.58	0.0036	0.0361	1.44249	3' UTR	2	19022325	19032642	10318	2	FBgn0263116	10101	37191	5-HT1B	5-hydroxytryptamine (serotonin) receptor 1B	5-HT1B
chr2R	23826183	23827339	1157	8.27	8.68	7.71	0.97	3.27e-06	0.000138	3.86012	Intron (FBtr0301162/FBgn0034911, intron 1 of 8)	2	23820354	23839864	19511	1	FBgn0034911	5829	37772	GlyT	Glycine transporter	GlyT
chrX	11380125	11380451	327	7.22	7.61	6.69	0.91	0.000341	0.00571	2.24336	Intron (FBtr0073483/FBgn0001624, intron 3 of 5)	6	11369665	11409776	40112	1	FBgn0001624	10460	32083	dlg1	discs large 1	dlg1
chr3L	9117930	9118927	998	8.96	9.39	8.35	1.03	5.76e-10	1.51e-07	6.82102	Intron (FBtr0331858/FBgn0011206, intron 1 of 7)	3	9097629	9134405	36777	2	FBgn0011206	15478	39049	bol	boule	bol
chrX	12531930	12532500	571	7.02	7.36	6.58	0.79	0.00367	0.0368	1.43415	Intron (FBtr0333156/FBgn0264542, intron 1 of 7)	6	12516634	12568452	51819	2	FBgn0264542	35952	32202	hwt	heavyweight	hwt
chr3R	11004348	11005080	733	8.34	8.69	7.86	0.83	8.77e-06	0.00029	3.5376	Intron (FBtr0301070/FBgn0083950, intron 2 of 14)	4	10972381	11050175	77795	1	FBgn0083950	31967	4379854	side-VI	sidestep VI	side-VI
chr4	1250766	1251303	538	7.39	7.81	6.8	1.01	3.78e-05	0.000985	3.00656	Exon (FBtr0333702/FBgn0053653, exon 17 of 23)	5	1230837	1271759	40923	1	FBgn0053653	19929	NA	NA	NA	Cadps
chrX	6696312	6696853	542	8.14	8.55	7.56	1	2.59e-07	1.73e-05	4.76195	3' UTR	6	6695866	6698567	2702	2	FBgn0029894	1714	31610	CG14440	uncharacterized protein	CG14440
chrX	18029008	18029839	832	7.65	7.98	7.23	0.75	0.00188	0.0218	1.66154	Intron (FBtr0089661/FBgn0003380, intron 3 of 13)	6	17924307	18063247	138941	2	FBgn0003380	33408	32780	Sh	Shaker	Sh
chr2L	17542542	17543303	762	8.21	8.56	7.76	0.8	3.01e-05	0.000826	3.08302	Distal Intergenic	1	17541854	17542383	530	1	FBgn0262996	688	NA	NA	NA	lncRNA:CR43304
chr3R	24498639	24499440	802	8.18	8.65	7.47	1.18	1.74e-09	3.09e-07	6.51004	Distal Intergenic	4	24488612	24488682	71	1	FBgn0262389	10027	NA	NA	NA	mir-1017
chr2R	14994989	14996164	1176	8.49	8.83	8.04	0.79	5.05e-05	0.00122	2.91364	Exon (FBtr0332258/FBgn0264378, exon 2 of 2)	2	14994559	14995195	637	1	FBgn0264378	430	NA	NA	NA	lncRNA:CR43830
chr3L	20830702	20831146	445	8.25	8.58	7.81	0.77	5.81e-05	0.00135	2.86967	Intron (FBtr0299891/FBgn0259243, intron 1 of 4)	3	20816118	20836048	19931	1	FBgn0259243	14584	40305	Pka-R1	Protein kinase, cAMP-dependent, regulatory subunit type 1	Pka-R1
chr2L	7546965	7547424	460	7.49	7.85	6.99	0.86	0.0004	0.00648	2.18842	Intron (FBtr0334850/FBgn0264895, intron 2 of 5)	1	7497805	7578980	81176	2	FBgn0264895	31556	34032	RapGAP1	Rap GTPase activating protein 1	RapGAP1
chrX	10360096	10360748	653	7.78	8.09	7.39	0.7	0.00129	0.0161	1.79317	Exon (FBtr0347009/FBgn0028331, exon 2 of 8)	6	10348680	10366273	17594	2	FBgn0028331	5525	31964	l(1)G0289	lethal (1) G0289	l(1)G0289
chrX	21241351	21241641	291	6.91	7.33	6.33	1	0.000203	0.00378	2.42251	Intron (FBtr0310652/FBgn0052521, intron 1 of 3)	6	21205310	21281171	75862	2	FBgn0052521	39530	33098	CG32521	uncharacterized protein	CG32521
chr2L	20097282	20098440	1159	8.64	8.94	8.27	0.66	8.17e-05	0.00179	2.74715	Promoter	1	20097581	20103375	5795	1	FBgn0032850	0	35300	Kua	Kua	Kua
chr3L	4409494	4410187	694	10.35	10.74	9.83	0.91	2.96e-09	4.3e-07	6.36653	Intron (FBtr0113140/FBgn0035542, intron 1 of 4)	3	4406943	4420648	13706	1	FBgn0035542	2551	38543	DOR	Diabetes and obesity regulated	DOR
chr2L	20906753	20908038	1286	9.28	9.5	9.01	0.49	0.00263	0.0282	1.54975	Intron (FBtr0081442/FBgn0032901, intron 1 of 10)	1	20871335	20918931	47597	2	FBgn0032901	10893	35359	sky	skywalker	sky
chr2R	13322483	13323512	1030	8.65	9.05	8.09	0.97	2.58e-08	2.6e-06	5.58503	Distal Intergenic	2	13329402	13329501	100	2	FBgn0262391	5989	NA	NA	NA	mir-184
chr3L	14863292	14863839	548	7.59	7.97	7.08	0.9	0.000136	0.00275	2.56067	Intron (FBtr0110825/FBgn0036454, intron 3 of 7)	3	14805136	14882224	77089	1	FBgn0036454	58156	39616	CG17839	uncharacterized protein	CG17839
chr3R	20282863	20283270	408	7.89	8.26	7.41	0.85	3.55e-05	0.000935	3.02919	Intron (FBtr0305029/FBgn0262582, intron 2 of 18)	4	20252770	20303942	51173	1	FBgn0262582	30093	53560	cic	capicua	cic
chr2R	16452982	16453495	514	7.21	7.65	6.57	1.08	1.14e-05	0.000356	3.44855	Distal Intergenic	2	16445986	16447512	1527	1	FBgn0034129	6996	36841	Parp16	Poly(ADP-ribose) polymerase family member 16	Parp16
chr3R	26659144	26659674	531	8.06	8.35	7.7	0.65	0.00132	0.0164	1.78516	Intron (FBtr0290328/FBgn0250908, intron 7 of 8)	4	26645282	26681966	36685	2	FBgn0250908	22292	43213	beat-VII	beaten path VII	beat-VII
chrX	15443373	15443849	477	8.58	8.93	8.13	0.8	1.91e-05	0.000561	3.25104	Downstream (2-3kb)	6	15386038	15441252	55215	2	FBgn0263257	-2121	32468	Cngl	Cyclic nucleotide-gated ion channel-like	Cngl
chr2R	8179785	8180750	966	8.28	8.63	7.8	0.83	5.94e-05	0.00136	2.86646	Intron (FBtr0344893/FBgn0053087, intron 1 of 22)	2	8174165	8226438	52274	1	FBgn0053087	5620	35799	LRP1	LDL receptor protein 1	LRP1
chr3L	16147359	16148478	1120	8.59	8.9	8.19	0.72	2.64e-05	0.00075	3.12494	5' UTR	3	16137802	16164701	26900	2	FBgn0036576	16223	39772	CG5151	uncharacterized protein	CG5151
chr2R	23982122	23982522	401	7.76	8.05	7.4	0.65	0.00307	0.0321	1.49349	Intron (FBtr0343282/FBgn0005612, intron 1 of 1)	2	23978801	23985177	6377	1	FBgn0005612	3321	37822	Sox14	Sox box protein 14	Sox14
chr3L	2903094	2903565	472	7.94	8.33	7.39	0.94	3.82e-06	0.000156	3.80688	Intron (FBtr0333899/FBgn0262593, intron 2 of 11)	3	2895017	2959579	64563	1	FBgn0262593	8077	38352	Shab	Shaker cognate b	Shab
chr3L	9051578	9052284	707	9.18	9.48	8.81	0.67	9.19e-06	0.000298	3.52578	5' UTR	3	9048781	9066027	17247	2	FBgn0000116	13743	39041	Argk	Arginine kinase	Argk
chr3L	18036149	18036643	495	9.2	9.45	8.89	0.56	0.000196	0.00369	2.43297	Intron (FBtr0306814/FBgn0000568, intron 3 of 7)	3	17950953	18064696	113744	2	FBgn0000568	28053	39999	Eip75B	Ecdysone-induced protein 75B	Eip75B
chr2R	11596565	11598143	1579	11.17	11.44	10.85	0.6	0.000916	0.0125	1.90309	Intron (FBtr0333071/FBgn0033636, intron 2 of 15)	2	11577485	11616045	38561	2	FBgn0033636	17902	36241	tou	toutatis	tou
chr3R	9184463	9185265	803	8.31	8.6	7.95	0.65	0.00114	0.0147	1.83268	Intron (FBtr0333667/FBgn0003165, intron 8 of 12)	4	9066343	9237682	171340	2	FBgn0003165	52417	41094	pum	pumilio	pum
chr2L	939899	941004	1106	9.45	9.83	8.93	0.9	5.08e-10	1.37e-07	6.86328	Intron (FBtr0077949/FBgn0028481, intron 2 of 10)	1	922793	958098	35306	1	FBgn0028481	17106	33276	CG4341	uncharacterized protein	CG4341
chr3R	15109991	15110996	1006	8.34	8.77	7.71	1.06	2.33e-08	2.39e-06	5.6216	Intron (FBtr0303485/FBgn0261859, intron 2 of 9)	4	15095957	15131926	35970	2	FBgn0261859	20930	41817	CG42788	uncharacterized protein	CG42788
chr3R	21186682	21187810	1129	8.74	9.01	8.42	0.6	0.000541	0.00827	2.08249	Intron (FBtr0084018/FBgn0264357, intron 7 of 12)	4	21140739	21214269	73531	1	FBgn0264357	45943	42515	SNF4Agamma	SNF4/AMP-activated protein kinase gamma subunit	SNF4Agamma
chrX	20447953	20449929	1977	10.22	10.41	10	0.41	0.00142	0.0174	1.75945	Promoter	6	20449331	20467065	17735	1	FBgn0052506	0	318059	CG32506	uncharacterized protein	CG32506
chr3R	21089376	21090725	1350	9.71	10	9.34	0.66	7.8e-06	0.000262	3.5817	Intron (FBtr0344590/FBgn0265067, intron 1 of 1)	4	21083043	21097827	14785	2	FBgn0038853	7102	42496	RhoGAP93B	Rho GTPase activating protein at 93B	RhoGAP93B
chr3L	10226058	10227194	1137	9.61	9.96	9.14	0.82	4.42e-08	4.02e-06	5.39577	Distal Intergenic	3	10220483	10225240	4758	2	FBgn0052056	-818	326186	scramb1	scramblase 1	scramb1
chr3R	16476572	16477500	929	8.46	8.72	8.13	0.59	0.00121	0.0154	1.81248	Promoter	4	16477110	16481070	3961	1	FBgn0038436	0	42002	Gyc89Db	Guanylyl cyclase at 89Db	Gyc89Db
chr2L	13205070	13205654	585	9.05	9.3	8.75	0.55	0.00052	0.008	2.09691	Intron (FBtr0080439/FBgn0032482, intron 1 of 6)	1	13203762	13210828	7067	1	FBgn0032482	1308	34716	Pect	Phosphoethanolamine cytidylyltransferase	Pect
chrX	11378103	11379757	1655	9.04	9.38	8.6	0.78	3.84e-07	2.38e-05	4.62342	Intron (FBtr0073483/FBgn0001624, intron 3 of 5)	6	11369665	11409776	40112	1	FBgn0001624	8438	32083	dlg1	discs large 1	dlg1
chr3L	11453725	11454921	1197	8.81	9.2	8.28	0.92	8.57e-09	1.09e-06	5.96257	Downstream (2-3kb)	3	11457076	11458470	1395	2	FBgn0036160	3549	39279	CG12289	uncharacterized protein	CG12289
chr3L	22234208	22235034	827	9.16	9.42	8.84	0.58	7.95e-05	0.00175	2.75696	Intron (FBtr0301492/FBgn0037153, intron 9 of 10)	3	22136090	22247702	111613	1	FBgn0037153	98118	40453	olf413	olf413	olf413
chr3R	11777869	11779014	1146	10.23	10.54	9.83	0.71	6.8e-08	5.68e-06	5.24565	5' UTR	4	11765038	11779128	14091	2	FBgn0265276	114	41423	l(3)neo38	lethal (3) neo38	l(3)neo38
chr2L	178910	179676	767	9.27	9.63	8.79	0.84	9.55e-07	5.03e-05	4.29843	Intron (FBtr0078122/FBgn0016977, intron 2 of 11)	1	159032	203397	44366	1	FBgn0016977	19878	44205	spen	split ends	spen
chr2L	21028071	21029201	1131	8.67	9.03	8.19	0.84	1.83e-06	8.36e-05	4.07779	5' UTR	1	20965520	21052164	86645	2	FBgn0250867	22963	7354398	CG42238	uncharacterized protein	CG42238
chr3R	26773126	26774235	1110	8.48	8.78	8.1	0.68	0.00021	0.00387	2.41229	Distal Intergenic	4	26769078	26769828	751	1	FBgn0267123	4048	NA	NA	NA	lncRNA:CR45563
chrX	2300590	2301647	1058	9.7	9.89	9.48	0.41	0.00193	0.0222	1.65365	Intron (FBtr0344007/FBgn0003079, intron 2 of 6)	6	2295466	2343870	48405	1	FBgn0003079	5124	31221	Raf	Raf oncogene	Raf
chr2R	11177997	11179623	1627	10.24	10.57	9.82	0.76	1.45e-09	2.79e-07	6.5544	Intron (FBtr0330619/FBgn0003396, intron 1 of 7)	2	11159086	11217394	58309	1	FBgn0003396	18911	36171	shn	schnurri	shn
chr2L	2945111	2946141	1031	8.74	9.09	8.28	0.81	4.04e-06	0.000162	3.79048	5' UTR	1	2885929	2954406	68478	1	FBgn0041111	59182	33496	lilli	lilliputian	lilli
chr3R	26606378	26607267	890	9.76	10.04	9.41	0.63	1.48e-06	7.04e-05	4.15243	Promoter	4	26607047	26608440	1394	1	FBgn0266256	0	NA	NA	NA	lncRNA:CR44951
chr2L	9754669	9755441	773	9.1	9.46	8.61	0.86	1.67e-08	1.9e-06	5.72125	Distal Intergenic	1	9758342	9762375	4034	1	FBgn0270924	-2901	34292	zf30C	zinc finger protein 30C	zf30C
chr3R	11855400	11855934	535	8.09	8.45	7.61	0.83	1.89e-05	0.000558	3.25337	Intron (FBtr0082517/FBgn0037956, intron 1 of 2)	4	11822702	11869460	46759	2	FBgn0037956	13526	41434	CG6959	uncharacterized protein	CG6959
chr3R	15417916	15418707	792	10.36	10.62	10.04	0.58	0.000115	0.0024	2.61979	Exon (FBtr0346982/FBgn0267571, exon 1 of 1)	4	15417320	15420710	3391	2	FBgn0267571	2003	NA	NA	NA	lncRNA:CR45911
chr2R	18372965	18375373	2409	9.87	10.17	9.49	0.68	2.44e-07	1.66e-05	4.77989	Distal Intergenic	2	18377487	18378196	710	1	FBgn0261700	-2114	NA	NA	NA	lncRNA:CR42736
chr3L	10854124	10854665	542	10.03	10.4	9.51	0.89	7.97e-10	1.84e-07	6.73518	Intron (FBtr0475045/FBgn0026160, intron 1 of 10)	3	10835528	10876496	40969	1	FBgn0026160	18596	39217	tna	tonalli	tna
chr3R	26347641	26348415	775	8.93	9.3	8.43	0.87	1.67e-08	1.9e-06	5.72125	Intron (FBtr0100012/FBgn0053970, intron 2 of 8)	4	26318355	26362588	44234	1	FBgn0053970	29286	43186	CG33970	uncharacterized protein	CG33970
chrX	19794414	19794985	572	8.69	8.91	8.42	0.49	0.00417	0.0407	1.39041	Distal Intergenic	6	19786730	19788156	1427	2	FBgn0266179	-6258	NA	NA	NA	lncRNA:CR44885
chr2L	18458455	18459102	648	10.31	10.48	10.1	0.38	0.00487	0.0456	1.34104	Intron (FBtr0306973/FBgn0263049, intron 1 of 2)	1	18455717	18473132	17416	1	FBgn0263049	2738	NA	NA	NA	lncRNA:let7C
chr2L	20082705	20083250	546	8.72	8.98	8.41	0.58	0.00358	0.036	1.4437	3' UTR	1	20075757	20089698	13942	1	FBgn0004374	6948	35293	neb	nebbish	neb
chr2R	13437258	13439132	1875	9.93	10.24	9.55	0.69	4.59e-08	4.13e-06	5.38405	Promoter	2	13437866	13437939	74	1	FBgn0050509	0	NA	NA	NA	tRNA:Ile-AAT-1-8
chr2L	7966562	7968459	1898	9.49	9.74	9.18	0.56	0.000404	0.00653	2.18509	Intron (FBtr0112718/FBgn0085450, intron 2 of 2)	1	7891187	7984196	93010	2	FBgn0085450	15737	5740414	Snoo	Sno oncogene	Snoo
chr3R	9982433	9982773	341	8.46	8.75	8.09	0.66	0.000591	0.00892	2.04964	Intron (FBtr0112576/FBgn0267336, intron 5 of 6)	4	9874681	9995364	120684	1	FBgn0267336	107752	41217	Glut4EF	Glucose transporter 4 enhancer factor	Glut4EF
chr3R	12538446	12539175	730	8.65	8.89	8.36	0.53	0.00173	0.0202	1.69465	Intron (FBtr0290334/FBgn0250910, intron 2 of 9)	4	12511570	12548229	36660	2	FBgn0250910	9054	3885573	Octbeta3R	Octopamine beta3 receptor	Octbeta3R
chr3R	20283725	20284599	875	9.51	9.73	9.25	0.48	0.000798	0.0112	1.95078	Intron (FBtr0305029/FBgn0262582, intron 2 of 18)	4	20252770	20303942	51173	1	FBgn0262582	30955	53560	cic	capicua	cic
chr3L	12842765	12843795	1031	9.08	9.32	8.78	0.54	0.00065	0.00952	2.02136	Promoter	3	12824880	12843106	18227	2	FBgn0036316	0	39458	CG10960	uncharacterized protein	CG10960
chr3L	22637909	22638439	531	8.58	8.81	8.3	0.52	0.00501	0.0465	1.33255	Promoter	3	22573114	22637916	64803	2	FBgn0037171	0	NA	NA	NA	CG14459
chr2R	9542329	9543213	885	10.33	10.64	9.93	0.7	1.75e-07	1.24e-05	4.90658	3' UTR	2	9541947	9548135	6189	2	FBgn0033421	4922	35979	CG1888	uncharacterized protein	CG1888
chr3R	13799946	13800456	511	10.02	10.3	9.67	0.63	4.61e-05	0.00114	2.9431	Distal Intergenic	4	13798198	13798270	73	2	FBgn0051331	-1676	NA	NA	NA	tRNA:Phe-GAA-1-7
chr3R	31222586	31223272	687	9.56	9.82	9.26	0.56	3.25e-05	0.00087	3.06048	Intron (FBtr0085758/FBgn0039831, intron 2 of 5)	4	31220702	31231259	10558	1	FBgn0039831	1884	43694	CG12054	uncharacterized protein	CG12054
chr3R	24574085	24575373	1289	9.68	9.97	9.33	0.64	2.94e-05	0.000812	3.09044	Exon (FBtr0347327/FBgn0267763, exon 1 of 1)	4	24557368	24582864	25497	2	FBgn0039209	7491	42930	REPTOR	Repressed by TOR	REPTOR
chr3L	7225302	7225861	560	9.14	9.35	8.89	0.47	0.00344	0.035	1.45593	Distal Intergenic	3	7222717	7223898	1182	1	FBgn0266959	2585	NA	NA	NA	lncRNA:CR45410
chr3R	11522780	11523234	455	8.54	8.91	8.04	0.87	4.55e-07	2.74e-05	4.56225	Distal Intergenic	4	11535495	11536273	779	1	FBgn0266416	-12261	NA	NA	NA	asRNA:CR45056
chrX	17962789	17963945	1157	10.2	10.45	9.88	0.57	0.000207	0.00383	2.4168	Intron (FBtr0089658/FBgn0003380, intron 2 of 12)	6	17924307	18063247	138941	2	FBgn0003380	99302	32780	Sh	Shaker	Sh
chr3L	2913245	2914459	1215	10.08	10.26	9.86	0.4	0.00278	0.0295	1.53018	Intron (FBtr0333899/FBgn0262593, intron 2 of 11)	3	2895017	2959579	64563	1	FBgn0262593	18228	38352	Shab	Shaker cognate b	Shab
chr3L	13673293	13674609	1317	9.98	10.25	9.66	0.59	1.37e-05	0.000419	3.37779	Intron (FBtr0330356/FBgn0264001, intron 4 of 13)	3	13521907	13803400	281494	2	FBgn0264001	128791	39527	bru3	bruno 3	bru3
chr3R	14017600	14018685	1086	9.47	9.73	9.13	0.6	0.000215	0.00393	2.40561	Intron (FBtr0301634/FBgn0264493, intron 2 of 8)	4	13967061	14032057	64997	2	FBgn0264493	13372	41704	rdx	roadkill	rdx
chr2L	15013419	15014128	710	10.13	10.38	9.81	0.57	4.89e-05	0.0012	2.92082	Distal Intergenic	1	15011815	15012667	853	2	FBgn0264438	-752	NA	NA	NA	lncRNA:CR43856
chr3L	16241078	16241909	832	10.11	10.39	9.75	0.64	1.25e-06	6.03e-05	4.21968	Distal Intergenic	3	16237723	16239462	1740	1	FBgn0263608	3355	39778	l(3)72Dr	lethal (3) 72Dr	l(3)72Dr
chr2R	7241364	7242598	1235	9.25	9.5	8.93	0.57	0.000494	0.00767	2.1152	Downstream (<1kb)	2	7243024	7245776	2753	2	FBgn0026602	3178	44750	Ady43A	Ady43A	Ady43A
chr3L	10503756	10505220	1465	9.73	9.92	9.51	0.41	0.00242	0.0264	1.5784	Intron (FBtr0305097/FBgn0052062, intron 1 of 13)	3	10481412	10594012	112601	1	FBgn0052062	22344	39198	Rbfox1	RNA-binding Fox protein 1	Rbfox1
chr3R	5803249	5804553	1305	10.43	10.63	10.2	0.44	0.000519	0.00799	2.09745	Exon (FBtr0113195/FBgn0263353, exon 1 of 4)	4	5802328	5813258	10931	1	FBgn0263353	921	40721	CG11000	uncharacterized protein	CG11000
chr2R	23395838	23396766	929	10.46	10.73	10.12	0.61	2.28e-06	0.000101	3.99568	Promoter	2	23389009	23396680	7672	2	FBgn0028497	0	37707	CG3530	uncharacterized protein	CG3530
chr2L	19021364	19022216	853	9.89	10.14	9.59	0.55	2.24e-05	0.000648	3.18842	Downstream (2-3kb)	1	19022417	19023646	1230	1	FBgn0032740	-201	35167	CG15172	uncharacterized protein	CG15172
chrX	13207720	13209033	1314	9.94	10.13	9.72	0.41	0.00212	0.0238	1.62342	Intron (FBtr0340488/FBgn0265630, intron 1 of 11)	6	13195499	13211674	16176	2	FBgn0265630	2641	32273	sno	strawberry notch	sno
chr2R	9368945	9369680	736	9.99	10.24	9.69	0.56	6.06e-05	0.00138	2.86012	Intron (FBtr0332997/FBgn0033405, intron 7 of 7)	2	9309296	9389467	80172	2	FBgn0033405	19787	35959	CG13954	uncharacterized protein	CG13954
chr3L	18066419	18067066	648	9.65	9.87	9.4	0.46	0.00198	0.0226	1.64589	Downstream (1-2kb)	3	17950953	18064696	113744	2	FBgn0000568	-1723	39999	Eip75B	Ecdysone-induced protein 75B	Eip75B
chr3R	24070938	24072039	1102	9.09	9.3	8.84	0.46	0.00492	0.0459	1.33819	Intron (FBtr0084587/FBgn0053100, intron 2 of 3)	4	24063077	24108960	45884	2	FBgn0053100	36921	326255	eIF4EHP	eukaryotic translation initiation factor 4E homologous protein	eIF4EHP
chr2L	7871202	7872785	1584	9.8	10	9.56	0.44	0.000588	0.00889	2.0511	Promoter	1	7864642	7871432	6791	2	FBgn0045038	0	250710	Proc	Proctolin	Proc
chr2R	8859472	8860815	1344	10.11	10.33	9.85	0.47	0.000556	0.00845	2.07314	Promoter	2	8860364	8888097	27734	1	FBgn0011286	0	49090	RyR	Ryanodine receptor	RyR
chr3R	23722163	23723970	1808	10.16	10.36	9.93	0.43	0.000415	0.00667	2.17587	Promoter	4	23723331	23731499	8169	1	FBgn0039109	0	42801	CG10365	uncharacterized protein	CG10365
chr3R	28960918	28961742	825	9.45	9.66	9.19	0.47	0.000736	0.0105	1.97881	Intron (FBtr0085347/FBgn0039617, intron 1 of 10)	4	28925004	28970372	45369	2	FBgn0039617	8630	43417	DIP-gamma	Dpr-interacting protein gamma	DIP-gamma
chr2R	9543720	9544549	830	9.81	10.11	9.43	0.67	1.53e-07	1.1e-05	4.95861	3' UTR	2	9541947	9548135	6189	2	FBgn0033421	3586	35979	CG1888	uncharacterized protein	CG1888
chr3R	12448992	12450057	1066	9.69	9.93	9.41	0.52	9.59e-05	0.00205	2.68825	Promoter	4	12449296	12456355	7060	1	FBgn0038053	0	41538	CG18549	uncharacterized protein	CG18549
chr3L	9468626	9469508	883	9.98	10.21	9.72	0.49	0.000215	0.00393	2.40561	Intron (FBtr0343555/FBgn0266101, intron 2 of 4)	3	9461050	9475475	14426	1	FBgn0266101	7576	39099	CG44838	uncharacterized protein	CG44838
chr2R	12200393	12202135	1743	9.82	10.02	9.59	0.43	0.0016	0.019	1.72125	Promoter	2	12199024	12200815	1792	2	FBgn0033699	0	36321	RpS11	Ribosomal protein S11	RpS11
chr2L	21617399	21619374	1976	10.08	10.26	9.87	0.4	0.00288	0.0305	1.5157	5' UTR	1	21614232	21624080	9849	2	FBgn0032955	4706	35417	CG2201	uncharacterized protein	CG2201
chr3L	7745956	7747801	1846	9.8	10.03	9.53	0.5	0.000227	0.00411	2.38616	Promoter	3	7747344	7750552	3209	1	FBgn0035816	0	38869	CG13685	uncharacterized protein	CG13685
chr3R	13525359	13526093	735	7.97	7.2	8.47	-1.27	7.69e-10	1.82e-07	6.73993	Downstream (2-3kb)	4	13522951	13523535	585	2	FBgn0038157	-1824	41658	CG12538	uncharacterized protein	CG12538
chr3R	19751055	19752302	1248	8.91	8.35	9.32	-0.97	6.47e-10	1.65e-07	6.78252	Intron (FBtr0301378/FBgn0024963, intron 1 of 7)	4	19730715	19775231	44517	1	FBgn0024963	20340	42350	GluClalpha	GluClalpha	GluClalpha
chr3R	22310331	22311543	1213	8.98	8.21	9.48	-1.27	7.57e-13	5.96e-10	9.22475	3' UTR	4	22308663	22324094	15432	2	FBgn0263117	12551	42608	CG34377	uncharacterized protein	CG34377
chr3R	27770195	27770745	551	7.43	6.61	7.96	-1.35	2.24e-07	1.54e-05	4.81248	Intron (FBtr0305292/FBgn0085382, intron 11 of 11)	4	27767966	27905843	137878	2	FBgn0085382	135098	5740590	CG34353	uncharacterized protein	CG34353
chr3L	22434613	22435452	840	8.53	7.75	9.03	-1.28	8.03e-12	3.86e-09	8.41341	Distal Intergenic	3	22424469	22424909	441	2	FBgn0267628	-9704	NA	NA	NA	lncRNA:CR45966
chr3L	10015574	10016729	1156	8.35	7.55	8.87	-1.31	6.68e-12	3.71e-09	8.43063	Intron (FBtr0076353/FBgn0040823, intron 2 of 5)	3	9974651	10139360	164710	1	FBgn0040823	40923	50296	dpr6	defective proboscis extension response 6	dpr6
chr3R	21935258	21936135	878	9.18	8.7	9.55	-0.85	2.95e-08	2.84e-06	5.54668	Distal Intergenic	4	21949114	22014539	65426	1	FBgn0264490	-12979	44936	Eip93F	Ecdysone-induced protein 93F	Eip93F
chr2L	4300135	4300511	377	6.76	5.57	7.41	-1.83	1.87e-09	3.13e-07	6.50446	Intron (FBtr0089268/FBgn0010473, intron 4 of 6)	1	4283148	4323781	40634	1	FBgn0010473	16987	46015	tutl	turtle	tutl
chr2R	17944917	17945639	723	7.26	6.75	7.63	-0.88	0.000372	0.00607	2.21681	Distal Intergenic	2	17954545	17955295	751	1	FBgn0265591	-8906	NA	NA	NA	lncRNA:CR44418
chr3R	28575343	28576136	794	7.55	6.68	8.08	-1.4	2.6e-09	3.83e-07	6.4168	Distal Intergenic	4	28580976	28585264	4289	2	FBgn0000659	9128	43383	fkh	fork head	fkh
chrX	14592627	14593047	421	8.17	7.65	8.55	-0.9	4.37e-05	0.00109	2.96257	Intron (FBtr0073943/FBgn0030574, intron 1 of 8)	6	14584733	14602580	17848	2	FBgn0030574	9533	32397	sbm	sobremesa	sbm
chr3L	16533721	16534385	665	7.83	7.09	8.31	-1.23	1.23e-07	9.29e-06	5.03198	Intron (FBtr0307367/FBgn0263131, intron 2 of 30)	3	16491838	16543370	51533	2	FBgn0263131	8985	39835	CG43373	uncharacterized protein	CG43373
chr2L	10654677	10655557	881	7.6	6.56	8.2	-1.64	3.98e-13	4.1e-10	9.38722	Distal Intergenic	1	10657627	10658031	405	1	FBgn0267256	-2070	NA	NA	NA	lncRNA:CR45692
chr3R	7387681	7388434	754	7.42	6.57	7.95	-1.39	1.39e-07	1.04e-05	4.98297	Exon (FBtr0346216/FBgn0267120, exon 1 of 1)	4	7387444	7388319	876	1	FBgn0267120	237	NA	NA	NA	lncRNA:CR45560
chr3R	22859808	22860709	902	8.45	7.54	9.01	-1.46	2.51e-15	5.92e-12	11.2277	Distal Intergenic	4	22851088	22851804	717	2	FBgn0264428	-8004	NA	NA	NA	lncRNA:CR43846
chr2R	23337771	23338413	643	7.57	7.06	7.94	-0.89	0.000125	0.00256	2.59176	Distal Intergenic	2	23329543	23330068	526	2	FBgn0050413	-7703	246601	CG30413	uncharacterized protein	CG30413
chr3R	27456545	27456983	439	7.1	6.08	7.69	-1.61	7.1e-10	1.73e-07	6.76195	Distal Intergenic	4	27464189	27467080	2892	1	FBgn0039518	-7206	43303	CG13978	uncharacterized protein	CG13978
chr3R	27569352	27570342	991	8.88	8.41	9.23	-0.82	2.79e-07	1.84e-05	4.73518	Intron (FBtr0085208/FBgn0027492, intron 1 of 8)	4	27561675	27582241	20567	2	FBgn0027492	11899	43312	wdb	widerborst	wdb
chr2L	12769037	12769739	703	8.39	7.66	8.88	-1.22	8.36e-10	1.88e-07	6.72584	Distal Intergenic	1	12767717	12768765	1049	2	FBgn0267925	-272	NA	NA	NA	lncRNA:CR46206
chrX	2855061	2855600	540	6.98	5.9	7.59	-1.69	9.68e-10	2.03e-07	6.6925	Intron (FBtr0309500/FBgn0028369, intron 2 of 10)	6	2740384	3134532	394149	1	FBgn0028369	114677	31292	kirre	kin of irre	kirre
chr3R	28411648	28412102	455	6.54	5.63	7.09	-1.45	5.89e-06	0.000216	3.66555	Distal Intergenic	4	28418208	28474814	56607	1	FBgn0039584	-6106	43377	beat-VI	beaten path VI	beat-VI
chr3L	21748510	21749270	761	8.58	7.83	9.07	-1.24	3.4e-10	1.04e-07	6.98297	Intron (FBtr0078450/FBgn0037130, intron 3 of 7)	3	21745359	21770534	25176	2	FBgn0037130	21264	40424	Syn1	Syntrophin-like 1	Syn1
chr3R	9905772	9906432	661	8.09	7.23	8.63	-1.4	6.36e-11	2.27e-08	7.64397	Intron (FBtr0114581/FBgn0267336, intron 1 of 2)	4	9874681	9995364	120684	1	FBgn0267336	31091	41217	Glut4EF	Glucose transporter 4 enhancer factor	Glut4EF
chr2R	7625509	7626416	908	7.39	6.7	7.85	-1.15	7.43e-06	0.000255	3.59346	Intron (FBtr0306933/FBgn0263077, intron 1 of 10)	2	7623242	7651787	28546	1	FBgn0263077	2267	35698	CG43340	uncharacterized protein	CG43340
chr2L	16941057	16941901	845	7.75	6.64	8.37	-1.73	9.82e-13	6.92e-10	9.15989	Downstream (2-3kb)	1	16944723	16945374	652	2	FBgn0262355	3473	NA	NA	NA	lncRNA:CR43053
chr2L	4428228	4428568	341	7.55	6.66	8.1	-1.44	4.2e-09	5.66e-07	6.24718	Intron (FBtr0331436/FBgn0031602, intron 1 of 3)	1	4403992	4441282	37291	2	FBgn0031602	12714	33646	CG15431	uncharacterized protein	CG15431
chr3L	17766998	17768020	1023	8.16	7.3	8.7	-1.4	2.16e-13	2.55e-10	9.59346	Distal Intergenic	3	17754936	17764158	9223	2	FBgn0043025	-2840	64879	Adgf-A2	Adenosine deaminase-related growth factor A2	Adgf-A2
chr2L	16017318	16017707	390	7.02	6.08	7.59	-1.51	5.3e-08	4.55e-06	5.34199	Intron (FBtr0343726/FBgn0028644, intron 2 of 7)	1	16000291	16041703	41413	1	FBgn0028644	17027	34945	beat-Ic	beaten path Ic	beat-Ic
chr2L	3236260	3236871	612	6.97	5.94	7.56	-1.61	2.36e-09	3.69e-07	6.43297	Distal Intergenic	1	3260973	3261281	309	2	FBgn0266876	24410	NA	NA	NA	lncRNA:CR45337
chrX	1250118	1250694	577	7.17	6.42	7.67	-1.25	7.36e-07	4.09e-05	4.38828	Intron (FBtr0070244/FBgn0028550, intron 4 of 4)	6	1242740	1275284	32545	2	FBgn0028550	24590	43867	Atf3	Activating transcription factor 3	Atf3
chr2L	19266942	19267518	577	6.78	6.11	7.23	-1.12	6.82e-05	0.00153	2.81531	Downstream (1-2kb)	1	19262470	19263057	588	1	FBgn0265080	4472	NA	NA	NA	lncRNA:CR44191
chr3L	10161879	10162451	573	6.96	6.39	7.37	-0.97	0.000617	0.00921	2.03574	Intron (FBtr0076308/FBgn0052057, intron 2 of 7)	3	10147454	10186108	38655	2	FBgn0052057	23657	39180	dpr10	defective proboscis extension response 10	dpr10
chr2R	17302540	17303123	584	8.08	7.61	8.43	-0.82	0.000104	0.00221	2.65561	Intron (FBtr0310346/FBgn0265487, intron 3 of 9)	2	17216549	17379376	162828	1	FBgn0265487	85991	36945	mbl	muscleblind	mbl
chr2L	12987166	12987535	370	7.18	5.88	7.85	-1.97	2.45e-14	3.85e-11	10.4145	Distal Intergenic	1	12978786	12981293	2508	1	FBgn0032464	8380	34695	Vha68-3	Vacuolar H[+] ATPase 68kD subunit 3	Vha68-3
chr2L	18228975	18230258	1284	9.65	9.34	9.91	-0.57	4.1e-05	0.00105	2.97881	Intron (FBtr0343817/FBgn0261804, intron 3 of 15)	1	18159811	18275770	115960	2	FBgn0261804	45512	35090	CG42750	uncharacterized protein	CG42750
chr2L	11231286	11232238	953	7.43	6.63	7.95	-1.32	1.6e-08	1.87e-06	5.72816	Intron (FBtr0332557/FBgn0264442, intron 3 of 8)	1	11210678	11261080	50403	1	FBgn0264442	20608	34560	ab	abrupt	ab
chrX	6129714	6130175	462	7.5	6.79	7.97	-1.18	2.76e-07	1.84e-05	4.73518	Intron (FBtr0334984/FBgn0264386, intron 11 of 26)	6	6104085	6192483	88399	2	FBgn0264386	62308	31550	Ca-alpha1T	Ca[2+]-channel protein alpha[[1]] subunit T	Ca-alpha1T
chr3L	9114168	9114916	749	7.42	6.42	8.01	-1.59	1.17e-09	2.35e-07	6.62893	Intron (FBtr0331858/FBgn0011206, intron 1 of 7)	3	9097629	9134405	36777	2	FBgn0011206	19489	39049	bol	boule	bol
chr3L	22185620	22186049	430	7.45	6.65	7.96	-1.31	1.79e-08	1.99e-06	5.70115	Intron (FBtr0301492/FBgn0037153, intron 2 of 10)	3	22136090	22247702	111613	1	FBgn0037153	49530	40453	olf413	olf413	olf413
chr2R	23497314	23497955	642	7.32	6.7	7.75	-1.05	4.06e-05	0.00104	2.98297	Distal Intergenic	2	23499651	23500702	1052	1	FBgn0034869	-1696	37719	CG13558	uncharacterized protein	CG13558
chr2L	18413284	18414500	1217	8.6	8.05	8.99	-0.94	3.1e-08	2.93e-06	5.53313	Distal Intergenic	1	18403948	18404600	653	1	FBgn0265680	9336	NA	NA	NA	lncRNA:CR44487
chr2R	19075717	19076540	824	8.42	7.91	8.79	-0.88	1.26e-06	6.06e-05	4.21753	Intron (FBtr0086577/FBgn0004168, intron 1 of 10)	2	19067155	19121958	54804	1	FBgn0004168	8562	NA	NA	NA	5-HT1A
chr3R	27379724	27380339	616	7.48	6.43	8.08	-1.65	4.83e-10	1.34e-07	6.8729	3' UTR	4	27375088	27437482	62395	2	FBgn0016061	57143	43300	side	sidestep	side
chr3R	6481794	6482953	1160	7.59	6.71	8.13	-1.42	2.47e-10	7.78e-08	7.10902	5' UTR	4	6478311	6495025	16715	1	FBgn0037448	3483	40797	CG15186	uncharacterized protein	CG15186
chr3L	20930695	20931045	351	6.18	5.39	6.69	-1.3	0.000265	0.00467	2.33068	Intron (FBtr0078267/FBgn0011591, intron 4 of 6)	3	20925891	20949512	23622	2	FBgn0011591	18467	40314	fng	fringe	fng
chrX	12147447	12148719	1273	8.28	7.76	8.66	-0.91	3.37e-06	0.000141	3.85078	Intron (FBtr0346335/FBgn0267001, intron 3 of 19)	6	12043698	12335214	291517	1	FBgn0267001	103749	32183	Ten-a	Tenascin accessory	Ten-a
chr2R	20830535	20831379	845	7.2	6.18	7.8	-1.62	2.26e-09	3.62e-07	6.44129	Intron (FBtr0071562/FBgn0011674, intron 1 of 3)	2	20821262	20836028	14767	2	FBgn0011674	4649	37355	insc	inscuteable	insc
chr3R	6560742	6561493	752	7.28	6.3	7.86	-1.56	3.45e-08	3.23e-06	5.4908	Intron (FBtr0336453/FBgn0053202, intron 2 of 7)	4	6529169	6593330	64162	2	FBgn0053202	31837	40800	dpr11	defective proboscis extension response 11	dpr11
chr3R	13622450	13623266	817	8.28	7.51	8.79	-1.27	1.49e-10	5.03e-08	7.29843	Distal Intergenic	4	13617750	13618559	810	2	FBgn0267240	-3891	NA	NA	NA	lncRNA:CR45680
chr3L	17798010	17798778	769	8.79	8.15	9.23	-1.08	6.49e-11	2.27e-08	7.64397	3' UTR	3	17797738	17802279	4542	2	FBgn0052190	3501	39978	NUCB1	NUCB1	NUCB1
chr2R	21925900	21926351	452	6.62	5.6	7.22	-1.62	2.07e-07	1.43e-05	4.84466	Intron (FBtr0112593/FBgn0085397, intron 2 of 4)	2	21872030	21946259	74230	1	FBgn0085397	53870	5740472	Fili	Fish-lips	Fili
chr2R	21400528	21401480	953	8.07	7.7	8.37	-0.67	0.000704	0.0101	1.99568	Intron (FBtr0305897/FBgn0010415, intron 2 of 4)	2	21392402	21481176	88775	2	FBgn0010415	79696	37447	Sdc	Syndecan	Sdc
chr2R	24441994	24442714	721	7.37	6.67	7.84	-1.17	9.69e-07	5.06e-05	4.29585	Distal Intergenic	2	24445500	24446839	1340	1	FBgn0035005	-2786	37900	CG3483	uncharacterized protein	CG3483
chr3R	18602567	18603392	826	7.64	6.57	8.25	-1.67	4.77e-13	4.1e-10	9.38722	Intron (FBtr0329922/FBgn0263974, intron 3 of 9)	4	18592801	18621327	28527	2	FBgn0038629	17935	42232	CG14304	uncharacterized protein	CG14304
chr2R	23254546	23255179	634	7.62	7.23	7.93	-0.7	0.00339	0.0345	1.46218	Distal Intergenic	2	23246610	23247893	1284	2	FBgn0034837	-6653	37684	RpL22-like	Ribosomal protein L22-like	RpL22-like
chr2L	13618189	13618758	570	7.03	6.28	7.53	-1.25	2.19e-06	9.71e-05	4.01278	Intron (FBtr0342903/FBgn0259984, intron 5 of 10)	1	13550139	13639411	89273	1	FBgn0259984	68050	34772	kuz	kuzbanian	kuz
chr2L	9283565	9284186	622	7.93	7.23	8.4	-1.17	6.43e-06	0.000228	3.64207	Intron (FBtr0079796/FBgn0267252, intron 2 of 2)	1	9256563	9302494	45932	1	FBgn0267252	27002	45234	Ggamma30A	G protein subunit gamma at 30A	Ggamma30A
chr3R	22852654	22853218	565	7.18	6.49	7.64	-1.15	7.04e-06	0.000246	3.60906	Distal Intergenic	4	22851088	22851804	717	2	FBgn0264428	-850	NA	NA	NA	lncRNA:CR43846
chr2R	23501966	23502435	470	6.88	5.95	7.44	-1.49	1.38e-07	1.03e-05	4.98716	Downstream (1-2kb)	2	23502946	23503815	870	1	FBgn0034870	-511	37720	CG13559	uncharacterized protein	CG13559
chr2L	3539969	3540285	317	8.03	7.33	8.5	-1.16	1.08e-08	1.33e-06	5.87615	5' UTR	1	3539247	3548423	9177	1	FBgn0024244	722	49638	drm	drumstick	drm
chr2R	20531274	20532002	729	7.74	7.19	8.13	-0.95	4.1e-05	0.00105	2.97881	Promoter	2	20531867	20532969	1103	1	FBgn0265862	0	NA	NA	NA	lncRNA:CR44651
chr3L	15384345	15385539	1195	8.51	7.99	8.89	-0.9	1.06e-06	5.42e-05	4.266	Distal Intergenic	3	15407832	15408267	436	1	FBgn0036495	-22293	2768950	CG33259	uncharacterized protein	CG33259
chr2R	5879321	5879847	527	6.88	6.13	7.38	-1.25	4.64e-06	0.00018	3.74473	5' UTR	2	5879196	5880395	1200	2	FBgn0265631	548	19834939	CG44438	uncharacterized protein	CG44438
chr2L	11704163	11704620	458	7.68	6.6	8.29	-1.69	8.57e-12	3.86e-09	8.41341	Distal Intergenic	1	11694804	11696107	1304	1	FBgn0032372	9359	34586	CG4988	uncharacterized protein	CG4988
chr2L	20546245	20546656	412	7.43	6.7	7.91	-1.21	9.6e-07	5.03e-05	4.29843	Distal Intergenic	1	20550951	20551354	404	2	FBgn0284409	4698	NA	NA	NA	lncRNA:TS1
chr2R	16514684	16515581	898	8.29	7.91	8.58	-0.67	0.000845	0.0117	1.93181	Intron (FBtr0087088/FBgn0011260, intron 2 of 14)	2	16500178	16533459	33282	1	FBgn0011260	14506	36846	Sema2a	Semaphorin 2a	Sema2a
chr3R	26811070	26811574	505	7.09	6.66	7.42	-0.76	0.00394	0.039	1.40894	Intron (FBtr0330155/FBgn0262473, intron 2 of 4)	4	26799041	26842403	43363	1	FBgn0262473	12029	43222	Tl	Toll	Tl
chr2L	20939650	20940712	1063	8.77	8.21	9.18	-0.96	6.43e-08	5.42e-06	5.266	Distal Intergenic	1	20929456	20934113	4658	2	FBgn0032908	-5537	35366	CG9270	uncharacterized protein	CG9270
chr2L	4168299	4169183	885	7.66	6.93	8.15	-1.21	2.99e-08	2.86e-06	5.54363	Distal Intergenic	1	4164689	4166134	1446	2	FBgn0026394	-2165	33623	Or24a	Odorant receptor 24a	Or24a
chr3R	22950018	22950639	622	6.98	6.32	7.43	-1.11	0.000199	0.00373	2.42829	Intron (FBtr0084337/FBgn0017590, intron 3 of 10)	4	22899284	22961731	62448	1	FBgn0017590	50734	42707	klg	klingon	klg
chr2L	4346744	4347362	619	7.5	6.81	7.96	-1.16	1.24e-06	6.03e-05	4.21968	Downstream (1-2kb)	1	4347501	4347954	454	1	FBgn0265908	-139	NA	NA	NA	lncRNA:CR44697
chr2R	22468889	22469762	874	8.33	7.87	8.68	-0.81	0.000129	0.00262	2.5817	Exon (FBtr0342991/FBgn0034731, exon 5 of 8)	2	22454741	22472995	18255	1	FBgn0034731	14148	37567	CG10384	uncharacterized protein	CG10384
chr3L	22078334	22079026	693	8.06	6.93	8.69	-1.76	1.36e-18	1.28e-14	13.8928	Downstream (2-3kb)	3	22080322	22080554	233	1	FBgn0259973	-1296	8674014	Sfp79B	Seminal fluid protein 79	Sfp79B
chr3R	13193135	13193505	371	7.21	6.61	7.64	-1.02	3.05e-05	0.000833	3.07935	Distal Intergenic	4	13191599	13192509	911	1	FBgn0038125	1536	41622	CG8141	uncharacterized protein	CG8141
chr2R	24381417	24382298	882	7.9	7.3	8.33	-1.03	5.81e-07	3.36e-05	4.47366	Exon (FBtr0072367/FBgn0000037, exon 5 of 5)	2	24378630	24390294	11665	2	FBgn0000037	7996	37892	mAChR-A	muscarinic Acetylcholine Receptor, A-type	mAChR-A
chr2L	18782794	18783901	1108	9.83	9.43	10.14	-0.71	1.23e-05	0.000381	3.41908	Intron (FBtr0305620/FBgn0045852, intron 1 of 7)	1	18762874	18792906	30033	2	FBgn0045852	9005	35135	ham	hamlet	ham
chr3R	10571265	10571551	287	7.67	7.19	8.03	-0.84	0.000151	0.00298	2.52578	Intron (FBtr0082255/FBgn0001235, intron 6 of 13)	4	10507561	10639568	132008	2	FBgn0001235	68017	41273	hth	homothorax	hth
chr3L	14869410	14869740	331	7.02	6.45	7.43	-0.98	0.000182	0.00349	2.45717	Exon (FBtr0075695/FBgn0036454, exon 10 of 19)	3	14805136	14882224	77089	1	FBgn0036454	64274	39616	CG17839	uncharacterized protein	CG17839
chr3R	14375814	14376225	412	8.59	8.01	9	-1	2.2e-08	2.29e-06	5.64016	Exon (FBtr0343915/FBgn0266248, exon 1 of 1)	4	14375399	14377344	1946	2	FBgn0266248	1119	NA	NA	NA	lncRNA:CR44943
chr3L	19112574	19113144	571	7.55	6.98	7.96	-0.98	3.01e-05	0.000826	3.08302	Intron (FBtr0346533/FBgn0036851, intron 2 of 4)	3	19105381	19138975	33595	2	FBgn0036851	25831	40088	CG14082	uncharacterized protein	CG14082
chr3R	15769758	15770305	548	7.38	6.63	7.88	-1.25	3.33e-07	2.14e-05	4.66959	Distal Intergenic	4	15766246	15767438	1193	2	FBgn0038357	-2320	41904	CG5623	uncharacterized protein	CG5623
chr3L	10754293	10755245	953	8.58	8.06	8.96	-0.9	2.32e-06	0.000101	3.99568	Distal Intergenic	3	10771925	10773399	1475	1	FBgn0262890	-16680	12798172	CG43245	uncharacterized protein	CG43245
chr2R	20509584	20510148	565	7.51	6.86	7.96	-1.1	7.63e-06	0.00026	3.58503	Exon (FBtr0342694/FBgn0265858, exon 1 of 1)	2	20509395	20509695	301	1	FBgn0265858	189	NA	NA	NA	lncRNA:CR44647
chr3R	15573279	15573824	546	7.45	6.71	7.94	-1.23	2.57e-07	1.73e-05	4.76195	Distal Intergenic	4	15548628	15552833	4206	2	FBgn0038350	-20446	41897	AOX4	Aldehyde oxidase 4	AOX4
chr3R	22872755	22873543	789	7.47	6.98	7.83	-0.85	0.00156	0.0187	1.72816	Distal Intergenic	4	22851088	22851804	717	2	FBgn0264428	-20951	NA	NA	NA	lncRNA:CR43846
chr3L	1184856	1185237	382	6.85	6.36	7.22	-0.86	0.00196	0.0225	1.64782	Distal Intergenic	3	1189588	1190472	885	1	FBgn0035186	-4351	38120	CG13912	uncharacterized protein	CG13912
chr2L	4705313	4705675	363	6.67	6.03	7.1	-1.07	0.000313	0.00535	2.27165	5' UTR	1	4694721	4722465	27745	1	FBgn0085380	10592	5740672	CG34351	uncharacterized protein	CG34351
chr2L	16570074	16570821	748	7.97	7.49	8.33	-0.84	5.91e-05	0.00136	2.86646	Intron (FBtr0300003/FBgn0259735, intron 2 of 4)	1	16545016	16663218	118203	1	FBgn0259735	25058	34987	mtgo	miles to go	mtgo
chr2R	17232412	17233371	960	8.2	7.07	8.82	-1.75	3.81e-12	2.25e-09	8.64782	Intron (FBtr0310346/FBgn0265487, intron 2 of 9)	2	17216549	17379376	162828	1	FBgn0265487	15863	36945	mbl	muscleblind	mbl
chr2L	19213842	19214597	756	7.95	7.27	8.41	-1.14	2.82e-08	2.77e-06	5.55752	Downstream (2-3kb)	1	19215451	19215967	517	1	FBgn0267928	-854	NA	NA	NA	lncRNA:CR46209
chr3L	20939681	20940299	619	7.59	6.77	8.11	-1.34	2.59e-09	3.83e-07	6.4168	Intron (FBtr0078267/FBgn0011591, intron 2 of 6)	3	20925891	20949512	23622	2	FBgn0011591	9213	40314	fng	fringe	fng
chr2L	5609960	5610619	660	7.29	6.62	7.74	-1.11	4.26e-06	0.000168	3.77469	Intron (FBtr0302933/FBgn0031725, intron 5 of 11)	1	5601723	5617946	16224	2	FBgn0031725	7327	33793	DIP-eta	Dpr-interacting protein eta	DIP-eta
chr3R	15730722	15731121	400	6.63	5.74	7.18	-1.44	1.49e-05	0.000453	3.3439	Downstream (1-2kb)	4	15731746	15732694	949	1	FBgn0085303	-625	5740212	CG34274	uncharacterized protein	CG34274
chr3L	14580195	14580655	461	7.9	7.35	8.3	-0.95	5.28e-05	0.00126	2.89963	Downstream (2-3kb)	3	14567440	14568133	694	1	FBgn0261816	12755	10178900	CG42758	uncharacterized protein	CG42758
chr2L	15339525	15339987	463	8.46	8.09	8.75	-0.66	0.00292	0.0308	1.51145	Distal Intergenic	1	15333866	15336138	2273	1	FBgn0001981	5659	34903	esg	escargot	esg
chr2R	20446013	20446743	731	7.79	7.07	8.26	-1.2	7.32e-08	6.06e-06	5.21753	Intron (FBtr0112774/FBgn0086604, intron 3 of 15)	2	20424338	20478951	54614	1	FBgn0086604	21675	37310	side-VIII	sidestep VIII	side-VIII
chr3L	10568283	10569528	1246	8.74	8.47	8.96	-0.49	0.00447	0.0429	1.36754	Exon (FBtr0305097/FBgn0052062, exon 3 of 14)	3	10481412	10594012	112601	1	FBgn0052062	86871	39198	Rbfox1	RNA-binding Fox protein 1	Rbfox1
chr2R	13695918	13697746	1829	8.7	8.28	9.03	-0.75	5.7e-06	0.000209	3.67985	Intron (FBtr0087625/FBgn0000633, intron 3 of 12)	2	13623044	13749367	126324	1	FBgn0000633	72874	36521	CG17716	uncharacterized protein	CG17716
chr3R	26404868	26405136	269	6.62	6.05	7.03	-0.98	0.00103	0.0136	1.86646	Distal Intergenic	4	26401909	26403656	1748	2	FBgn0039424	-1212	43188	ppk15	pickpocket 15	ppk15
chr3L	13568437	13568970	534	7.18	6.48	7.66	-1.18	6.97e-06	0.000245	3.61083	Intron (FBtr0330351/FBgn0264001, intron 5 of 12)	3	13521907	13803400	281494	2	FBgn0264001	234430	39527	bru3	bruno 3	bru3
chr2L	17339814	17340500	687	8.12	7.25	8.66	-1.41	4.84e-11	1.83e-08	7.73755	Distal Intergenic	1	17353730	17354668	939	2	FBgn0265270	14168	NA	NA	NA	lncRNA:CR43239
chr3R	11849506	11850157	652	7.65	6.91	8.14	-1.22	8.31e-08	6.76e-06	5.17005	Intron (FBtr0082517/FBgn0037956, intron 1 of 2)	4	11822702	11869460	46759	2	FBgn0037956	19303	41434	CG6959	uncharacterized protein	CG6959
chr3R	15580105	15581103	999	7.62	7.17	7.96	-0.79	0.00107	0.0141	1.85078	Distal Intergenic	4	15548628	15552833	4206	2	FBgn0038350	-27272	41897	AOX4	Aldehyde oxidase 4	AOX4
chrX	6204519	6205169	651	6.93	6.42	7.3	-0.88	0.000968	0.0131	1.88273	Distal Intergenic	6	6200188	6202559	2372	2	FBgn0040069	-1960	31551	vanin-like	vanin-like	vanin-like
chr2L	19971484	19972374	891	8.23	7.78	8.58	-0.79	2.18e-05	0.000634	3.19791	5' UTR	1	19968684	20017282	48599	2	FBgn0264443	44908	35284	CG43861	uncharacterized protein	CG43861
chr3L	8864751	8865543	793	7.71	7.36	7.99	-0.63	0.00528	0.0484	1.31515	Intron (FBtr0076583/FBgn0263930, intron 1 of 8)	3	8827505	8891192	63688	1	FBgn0263930	37246	39013	dally	division abnormally delayed	dally
chr3R	28384494	28385095	602	6.93	6.31	7.36	-1.04	0.000128	0.00262	2.5817	Distal Intergenic	4	28352242	28353620	1379	1	FBgn0039582	32252	NA	NA	NA	Or98b
chr3L	17712599	17713276	678	6.99	5.97	7.59	-1.62	1.84e-09	3.13e-07	6.50446	Intron (FBtr0075186/FBgn0052183, intron 2 of 9)	3	17690015	17748839	58825	1	FBgn0052183	22584	39972	Ccn	Ccn	Ccn
chr2R	11767717	11768189	473	6.56	5.88	7.02	-1.13	0.00014	0.00282	2.54975	Intron (FBtr0304622/FBgn0033652, intron 1 of 4)	2	11756817	11814424	57608	1	FBgn0033652	10900	36258	ths	thisbe	ths
chr3R	15493313	15493938	626	7.68	7.11	8.08	-0.97	2.9e-05	0.000806	3.09366	Downstream (2-3kb)	4	15494602	15495620	1019	1	FBgn0038345	-664	41892	CG5213	uncharacterized protein	CG5213
chr3L	1696809	1697463	655	7.88	7.37	8.25	-0.88	2.54e-05	0.000728	3.13787	Intron (FBtr0303102/FBgn0035260, intron 1 of 3)	3	1674709	1715541	40833	1	FBgn0035260	22100	38214	CG7991	uncharacterized protein	CG7991
chr3L	22226726	22227127	402	7.2	6.55	7.65	-1.1	5.25e-05	0.00126	2.89963	Intron (FBtr0301492/FBgn0037153, intron 6 of 10)	3	22136090	22247702	111613	1	FBgn0037153	90636	40453	olf413	olf413	olf413
chrX	20858906	20859316	411	7.18	6.43	7.68	-1.25	7.6e-07	4.18e-05	4.37882	Intron (FBtr0342859/FBgn0085387, intron 2 of 10)	6	20761071	20927050	165980	2	FBgn0085387	67734	33062	shakB	shaking B	shakB
chr2R	8310812	8311516	705	8.3	7.66	8.74	-1.08	3.78e-09	5.33e-07	6.27327	Promoter	2	8310521	8311234	714	2	FBgn0265642	0	NA	NA	NA	lncRNA:TS18
chr2L	14943622	14944838	1217	8.7	8.11	9.12	-1.01	9.59e-10	2.03e-07	6.6925	Intron (FBtr0345431/FBgn0259213, intron 2 of 19)	1	14907489	14972300	64812	2	FBgn0259213	27462	3346206	side-II	sidestep II	side-II
chr3L	741420	742110	691	7.56	7.14	7.88	-0.73	0.00285	0.0302	1.51999	Intron (FBtr0331769/FBgn0035160, intron 1 of 1)	3	737680	755489	17810	2	FBgn0035160	13379	38090	hng3	hinge3	hng3
chr3R	11139989	11140564	576	8.07	7.49	8.48	-0.99	6.24e-06	0.000224	3.64975	Distal Intergenic	4	11137177	11139742	2566	1	FBgn0037862	2812	41326	mAcon2	Mitochondrial aconitase 2	mAcon2
chr2L	20492146	20492562	417	7.19	6.74	7.54	-0.79	0.00162	0.0192	1.7167	Distal Intergenic	1	20495030	20495758	729	1	FBgn0054007	-2468	3885610	CG34007	uncharacterized protein	CG34007
chr2R	22335462	22336256	795	8.33	7.97	8.62	-0.66	0.000287	0.00498	2.30277	Exon (FBtr0071847/FBgn0034720, exon 11 of 13)	2	22333500	22373109	39610	2	FBgn0034720	36853	37552	Liprin-gamma	Liprin-gamma	Liprin-gamma
chr2L	20544355	20544915	561	7.25	6.73	7.63	-0.9	0.000365	0.00598	2.2233	Distal Intergenic	1	20539393	20539974	582	2	FBgn0267271	-4381	NA	NA	NA	lncRNA:CR45707
chr2L	9116228	9116587	360	6.61	5.7	7.17	-1.47	8.17e-07	4.46e-05	4.35067	Distal Intergenic	1	9119582	9120040	459	1	FBgn0265828	-2995	NA	NA	NA	lncRNA:CR44617
chr2R	17346038	17346674	637	7.67	7.05	8.1	-1.05	2.65e-06	0.000114	3.9431	Intron (FBtr0310346/FBgn0265487, intron 3 of 9)	2	17216549	17379376	162828	1	FBgn0265487	129489	36945	mbl	muscleblind	mbl
chr3L	19073164	19073850	687	8.94	8.53	9.27	-0.74	7.82e-06	0.000262	3.5817	Intron (FBtr0333220/FBgn0036844, intron 1 of 4)	3	19066155	19086426	20272	2	FBgn0036844	12576	40081	Mkp3	Mitogen-activated protein kinase phosphatase 3	Mkp3
chr2L	3248205	3248602	398	7.11	6.54	7.52	-0.98	0.000116	0.0024	2.61979	Distal Intergenic	1	3260973	3261281	309	2	FBgn0266876	12679	NA	NA	NA	lncRNA:CR45337
chr3R	13532489	13532869	381	6.63	6.03	7.05	-1.02	0.00114	0.0147	1.83268	Distal Intergenic	4	13528597	13529356	760	2	FBgn0261846	-3133	10178823	CG42778	uncharacterized protein	CG42778
chr2L	18867734	18868333	600	8.5	8.16	8.77	-0.61	0.00119	0.0152	1.81816	Intron (FBtr0081111/FBgn0003896, intron 1 of 8)	1	18859507	18881261	21755	2	FBgn0003896	12928	35147	tup	tailup	tup
chr3L	5717582	5718146	565	7.84	7.35	8.2	-0.86	0.00011	0.0023	2.63827	3' UTR	3	5657913	5749599	91687	1	FBgn0085447	59669	43892	sif	still life	sif
chr2L	5230726	5231180	455	6.77	5.96	7.28	-1.32	1.03e-05	0.000327	3.48545	Intron (FBtr0079089/FBgn0003716, intron 1 of 2)	1	5219000	5271384	52385	2	FBgn0003716	40204	33753	tkv	thickveins	tkv
chr3R	6096579	6097645	1067	7.51	6.86	7.96	-1.1	5.49e-06	0.000203	3.6925	Intron (FBtr0112922/FBgn0026077, intron 1 of 4)	4	6088799	6100887	12089	2	FBgn0026077	3242	40745	Gasp	gasp	Gasp
chr3R	13073224	13073483	260	6.3	5.01	6.97	-1.96	1.88e-08	2.02e-06	5.69465	Intron (FBtr0082711/FBgn0004666, intron 2 of 7)	4	13057755	13078124	20370	1	FBgn0004666	15469	41612	sim	single-minded	sim
chr2L	3288730	3289022	293	6	4.93	6.61	-1.68	8.59e-06	0.000286	3.54363	Downstream (2-3kb)	1	3287822	3288591	770	1	FBgn0265678	908	NA	NA	NA	lncRNA:CR44485
chr3L	19361808	19362524	717	7.86	7.41	8.21	-0.8	0.000652	0.00953	2.02091	Intron (FBtr0089796/FBgn0052206, intron 9 of 13)	3	19340321	19412912	72592	2	FBgn0052206	50388	40105	CG32206	uncharacterized protein	CG32206
chr3R	15467763	15468608	846	6.95	6.23	7.44	-1.21	1.92e-05	0.000563	3.24949	Intron (FBtr0083160/FBgn0286071, intron 1 of 16)	4	15442246	15476193	33948	2	FBgn0286071	7585	41887	AdamTS-A	ADAM metallopeptidase with thrombospondin type 1 motif A	AdamTS-A
chr3R	8456125	8456744	620	8.16	7.75	8.48	-0.73	0.000141	0.00282	2.54975	Intron (FBtr0345458/FBgn0266801, intron 1 of 15)	4	8364328	8477617	113290	2	FBgn0266801	20873	50003	CG45263	uncharacterized protein	CG45263
chr3R	23877534	23878141	608	7.37	6.65	7.85	-1.19	1.23e-06	6.01e-05	4.22113	Intron (FBtr0112907/FBgn0025574, intron 2 of 9)	4	23860162	23890052	29891	2	FBgn0025574	11911	42821	Pli	Pellino	Pli
chr3R	8502171	8503298	1128	8.61	8.17	8.95	-0.78	4.08e-06	0.000163	3.78781	Distal Intergenic	4	8510077	8511358	1282	2	FBgn0037590	8060	41007	Or85b	Odorant receptor 85b	Or85b
chr3R	28097339	28097790	452	7.25	6.36	7.79	-1.44	1.05e-08	1.3e-06	5.88606	Distal Intergenic	4	28137647	28137965	319	2	FBgn0267746	40175	NA	NA	NA	lncRNA:CR46077
chr3R	7465904	7466260	357	6.61	5.83	7.11	-1.28	1.64e-05	0.000493	3.30715	Downstream (1-2kb)	4	7467940	7468662	723	2	FBgn0266239	2402	NA	NA	NA	lncRNA:CR44934
chr2L	12899345	12899881	537	8.13	7.76	8.43	-0.68	0.00113	0.0146	1.83565	Distal Intergenic	1	12912530	12916774	4245	1	FBgn0040508	-12649	34689	ACXC	Adenylyl cyclase X C	ACXC
chr3R	16748665	16749112	448	6.91	6.32	7.33	-1.01	0.000676	0.00979	2.00922	Intron (FBtr0083341/FBgn0020556, intron 2 of 2)	4	16742125	16773189	31065	2	FBgn0020556	24077	NA	NA	NA	lncRNA:bxd
chrX	2906946	2907435	490	6.95	6.47	7.31	-0.84	0.00192	0.0221	1.65561	Intron (FBtr0309500/FBgn0028369, intron 3 of 10)	6	2740384	3134532	394149	1	FBgn0028369	166562	31292	kirre	kin of irre	kirre
chr2R	9343984	9344338	355	6.73	6.12	7.16	-1.04	0.000354	0.00587	2.23136	Intron (FBtr0088558/FBgn0033403, intron 2 of 3)	2	9309296	9351655	42360	2	FBgn0033403	7317	35957	CG13739	uncharacterized protein	CG13739
chr3L	2615395	2615961	567	7.84	7.2	8.29	-1.09	1.5e-07	1.09e-05	4.96257	Intron (FBtr0072954/FBgn0011828, intron 1 of 8)	3	2601455	2630064	28610	2	FBgn0011828	14103	38326	Pxn	Peroxidasin	Pxn
chr3R	11388623	11390112	1490	8.82	8.52	9.07	-0.55	0.00146	0.0177	1.75203	Intron (FBtr0304604/FBgn0004595, intron 5 of 6)	4	11328480	11407627	79148	1	FBgn0004595	60143	41363	pros	prospero	pros
chr3R	17247216	17247999	784	7.9	7.55	8.18	-0.63	0.00236	0.0258	1.58838	5' UTR	4	17232253	17265049	32797	2	FBgn0038494	17050	42082	beat-IIb	beaten path IIb	beat-IIb
chr3L	21142520	21143362	843	8.09	7.08	8.68	-1.6	3.7e-15	6.99e-12	11.1555	Intron (FBtr0305501/FBgn0024150, intron 4 of 16)	3	21136447	21171930	35484	2	FBgn0024150	28568	40333	Ac78C	Adenylyl cyclase 78C	Ac78C
chr3L	8273981	8274677	697	9.41	8.98	9.74	-0.77	2.15e-06	9.61e-05	4.01728	Exon (FBtr0299841/FBgn0263219, exon 20 of 32)	3	8238647	8282398	43752	1	FBgn0263219	35334	2769008	Dscam4	Down syndrome cell adhesion molecule 4	Dscam4
chr3L	13123873	13124168	296	5.9	4.8	6.52	-1.72	4.15e-06	0.000165	3.78252	Distal Intergenic	3	13114271	13118077	3807	1	FBgn0010452	9602	39491	trn	tartan	trn
chr3L	13646148	13646721	574	8.01	7.28	8.49	-1.2	5.21e-08	4.51e-06	5.34582	Intron (FBtr0330351/FBgn0264001, intron 2 of 12)	3	13521907	13803400	281494	2	FBgn0264001	156679	39527	bru3	bruno 3	bru3
chr2L	514262	514974	713	8.95	8.5	9.3	-0.8	5.47e-06	0.000203	3.6925	Intron (FBtr0333012/FBgn0003963, intron 1 of 7)	1	476220	540560	64341	1	FBgn0003963	38042	33225	ush	u-shaped	ush
chr2R	13642970	13643573	604	7.81	7.06	8.31	-1.25	3.88e-09	5.37e-07	6.27003	Intron (FBtr0087625/FBgn0000633, intron 1 of 12)	2	13623044	13749367	126324	1	FBgn0000633	19926	36521	CG17716	uncharacterized protein	CG17716
chr3R	24432713	24433253	541	7.79	7.14	8.24	-1.1	2.01e-07	1.41e-05	4.85078	Intron (FBtr0334916/FBgn0000036, intron 2 of 9)	4	24393896	24457157	63262	2	FBgn0000036	23904	42918	nAChRalpha1	nicotinic Acetylcholine Receptor alpha1	nAChRalpha1
chr3R	7135646	7136347	702	9.44	9.01	9.77	-0.76	4.65e-06	0.00018	3.74473	Promoter	4	7136206	7141972	5767	1	FBgn0037475	0	2768661	Fer1	48 related 1	Fer1
chr3R	11275856	11276553	698	8.42	8.13	8.67	-0.54	0.00235	0.0258	1.58838	Intron (FBtr0308921/FBgn0051386, intron 4 of 4)	4	11269415	11305608	36194	2	FBgn0051386	29055	NA	NA	NA	lncRNA:CR31386
chr2R	17313019	17313515	497	8.2	7.55	8.65	-1.09	3.67e-08	3.4e-06	5.46852	Intron (FBtr0310346/FBgn0265487, intron 3 of 9)	2	17216549	17379376	162828	1	FBgn0265487	96470	36945	mbl	muscleblind	mbl
chr3L	22360949	22361441	493	7.91	7.32	8.32	-1	4.97e-06	0.000191	3.71897	Intron (FBtr0078509/FBgn0004449, intron 1 of 8)	3	22293044	22407863	114820	2	FBgn0004449	46422	40464	Ten-m	Tenascin major	Ten-m
chr3R	6132319	6132871	553	7.78	7.15	8.21	-1.06	5.78e-07	3.36e-05	4.47366	Distal Intergenic	4	6127229	6127955	727	2	FBgn0263498	-4364	NA	NA	NA	lncRNA:CR43487
chr3R	25770795	25771401	607	7.56	6.69	8.09	-1.4	1.81e-08	1.99e-06	5.70115	Downstream (1-2kb)	4	25773334	25775369	2036	2	FBgn0039366	3968	43110	CG17198	uncharacterized protein	CG17198
chr3R	20362088	20362555	468	6.05	5.14	6.61	-1.47	3.86e-05	0.001	3	Distal Intergenic	4	20360308	20360634	327	1	FBgn0038790	1780	42416	MtnC	Metallothionein C	MtnC
chr3R	20144928	20145323	396	7.13	6.36	7.63	-1.27	6.81e-07	3.85e-05	4.41454	Distal Intergenic	4	20139148	20139921	774	2	FBgn0262025	-5007	NA	NA	NA	lncRNA:CR42836
chr3R	15010437	15010858	422	6.33	5.59	6.82	-1.23	0.000144	0.00286	2.54363	Distal Intergenic	4	15014770	15016034	1265	1	FBgn0038280	-3912	41810	CG14861	uncharacterized protein	CG14861
chr2L	10522155	10522528	374	7.34	6.84	7.71	-0.87	0.0014	0.0172	1.76447	Distal Intergenic	1	10517335	10519269	1935	1	FBgn0010398	4820	34449	Lrr47	Leucine-rich repeat 47	Lrr47
chr3R	25378379	25378763	385	7.28	6.78	7.65	-0.87	0.000372	0.00607	2.21681	Intron (FBtr0089982/FBgn0004509, intron 4 of 11)	4	25347431	25473058	125628	2	FBgn0004509	94295	47220	Fur1	Furin 1	Fur1
chr2R	23278761	23280184	1424	8.58	8.08	8.95	-0.87	3.41e-06	0.000142	3.84771	Downstream (2-3kb)	2	23271257	23275536	4280	2	FBgn0003009	-3225	37687	ord	orientation disruptor	ord
chr2L	14023794	14026142	2349	11	10.48	11.39	-0.9	1.89e-09	3.13e-07	6.50446	Promoter	1	14023722	14024099	378	2	FBgn0051840	0	NA	NA	NA	lncRNA:CR31840
chr2L	17832533	17833106	574	7.2	6.56	7.64	-1.08	5.5e-05	0.0013	2.88606	Intron (FBtr0303836/FBgn0262018, intron 1 of 13)	1	17786971	17875247	88277	2	FBgn0262018	42141	35071	CadN2	Cadherin-N2	CadN2
chr2R	6931155	6931404	250	6.54	5.9	6.98	-1.08	0.00124	0.0157	1.8041	Exon (FBtr0332942/FBgn0053558, exon 11 of 19)	2	6924687	6971637	46951	2	FBgn0053558	40233	2768716	mim	missing-in-metastasis	mim
chr2L	17930676	17931416	741	7.85	7.36	8.22	-0.86	7e-05	0.00157	2.8041	Distal Intergenic	1	17939019	17939715	697	2	FBgn0265549	8299	NA	NA	NA	lncRNA:CR44399
chr2L	12789294	12789839	546	7.31	6.44	7.85	-1.41	1.14e-08	1.38e-06	5.86012	Distal Intergenic	1	12774054	12775252	1199	2	FBgn0284416	-14042	NA	NA	NA	lncRNA:TS9
chr2L	7422492	7422758	267	8.27	7.93	8.55	-0.62	0.0016	0.0191	1.71897	3' UTR	1	7412417	7422736	10320	1	FBgn0028387	10075	43928	chm	chameau	chm
chr2L	5932356	5932894	539	7.27	6.26	7.86	-1.59	2.12e-08	2.24e-06	5.64975	Intron (FBtr0079145/FBgn0015381, intron 3 of 4)	1	5925937	5939261	13325	1	FBgn0015381	6419	33823	dsf	dissatisfaction	dsf
chr2R	22792075	22792433	359	8.2	7.69	8.58	-0.89	0.000318	0.00539	2.26841	Intron (FBtr0299573/FBgn0259145, intron 1 of 10)	2	22740999	22798289	57291	2	FBgn0259145	5856	37614	CG42260	uncharacterized protein	CG42260
chr2R	17075768	17076808	1041	8.26	7.73	8.65	-0.93	1.8e-06	8.26e-05	4.08302	5' UTR	2	17065971	17087633	21663	2	FBgn0050460	10825	36924	CG30460	uncharacterized protein	CG30460
chr2L	1482336	1482684	349	6.65	6	7.1	-1.1	0.000194	0.00367	2.43533	Distal Intergenic	1	1492295	1493859	1565	1	FBgn0051928	-9611	326175	CG31928	uncharacterized protein	CG31928
chr2L	5421567	5421986	420	8.99	8.66	9.26	-0.59	0.0019	0.0219	1.65956	Distal Intergenic	1	5431842	5432604	763	1	FBgn0263866	-9856	NA	NA	NA	lncRNA:CR43713
chr3R	15547982	15548431	450	6.65	5.6	7.25	-1.65	2.72e-08	2.71e-06	5.56703	Promoter	4	15542748	15548188	5441	2	FBgn0038349	0	41896	AOX3	Aldehyde oxidase 3	AOX3
chr2L	7423201	7423832	632	8.82	8.53	9.05	-0.52	0.00299	0.0314	1.50307	Promoter	1	7423820	7425932	2113	1	FBgn0264439	0	NA	NA	NA	lncRNA:CR43857
chr3R	12883997	12884296	300	6.48	5.41	7.09	-1.68	1.02e-07	8e-06	5.09691	Distal Intergenic	4	12891956	12893158	1203	1	FBgn0038089	-7660	41580	d-cup	davis-cup	d-cup
chrX	20944239	20945482	1244	8.52	8.22	8.76	-0.54	0.00267	0.0285	1.54516	Distal Intergenic	6	20934869	20939503	4635	1	FBgn0261675	9370	33072	Npc1b	Niemann-Pick type C-1b	Npc1b
chr2L	11784769	11785317	549	7.56	6.83	8.05	-1.21	2.34e-07	1.6e-05	4.79588	Distal Intergenic	1	11788334	11789475	1142	1	FBgn0032374	-3017	34588	CG14931	uncharacterized protein	CG14931
chr2L	3534178	3534487	310	7.34	6.96	7.64	-0.68	0.00455	0.0433	1.36351	Distal Intergenic	1	3537844	3538333	490	1	FBgn0265367	-3357	NA	NA	NA	lncRNA:CR44308
chrX	2997457	2997678	222	6.07	5.21	6.61	-1.4	0.00083	0.0115	1.9393	Intron (FBtr0309500/FBgn0028369, intron 6 of 10)	6	2740384	3134532	394149	1	FBgn0028369	257073	31292	kirre	kin of irre	kirre
chr2R	13332478	13333152	675	8.24	7.69	8.64	-0.95	1.95e-06	8.83e-05	4.05404	Intron (FBtr0346709/FBgn0265104, intron 1 of 1)	2	13329352	13344808	15457	2	FBgn0265104	11656	NA	NA	NA	lncRNA:CR44206
chr3R	13057253	13057826	574	8.79	8.33	9.15	-0.82	7.72e-06	0.000261	3.58336	Promoter	4	13057755	13078124	20370	1	FBgn0004666	0	41612	sim	single-minded	sim
chr2L	17293594	17294297	704	7.83	7.16	8.29	-1.13	3.93e-07	2.41e-05	4.61798	Distal Intergenic	1	17291075	17292202	1128	2	FBgn0032632	-1392	35040	CG6380	uncharacterized protein	CG6380
chr2R	9628741	9629308	568	8.13	7.73	8.44	-0.71	0.00045	0.00704	2.15243	Intron (FBtr0334807/FBgn0033438, intron 1 of 5)	2	9611139	9683858	72720	2	FBgn0033438	54550	35997	Mmp2	Matrix metalloproteinase 2	Mmp2
chr3L	8264504	8265525	1022	7.83	7.29	8.22	-0.93	0.000183	0.00349	2.45717	Intron (FBtr0299841/FBgn0263219, intron 8 of 31)	3	8238647	8282398	43752	1	FBgn0263219	25857	2769008	Dscam4	Down syndrome cell adhesion molecule 4	Dscam4
chrX	20287367	20287784	418	7.05	6.44	7.47	-1.04	0.000216	0.00394	2.4045	Distal Intergenic	6	20292047	20293407	1361	2	FBgn0267060	5623	NA	NA	NA	lncRNA:CR45504
chr2R	20459792	20460114	323	7.18	6.54	7.62	-1.08	2.67e-05	0.000756	3.12148	Intron (FBtr0112774/FBgn0086604, intron 4 of 15)	2	20424338	20478951	54614	1	FBgn0086604	35454	37310	side-VIII	sidestep VIII	side-VIII
chr2L	12834765	12835338	574	8.19	7.88	8.45	-0.57	0.00261	0.028	1.55284	Distal Intergenic	1	12840895	12841323	429	1	FBgn0266305	-5557	NA	NA	NA	lncRNA:CR44970
chrX	16515170	16515806	637	7.85	7.48	8.15	-0.67	0.00411	0.0403	1.39469	Intron (FBtr0342746/FBgn0285944, intron 4 of 30)	6	16455027	16533096	78070	2	FBgn0285944	17290	32619	para	paralytic	para
chr2R	6776378	6776948	571	7.36	6.94	7.69	-0.75	0.00207	0.0233	1.63264	5' UTR	2	6759715	6798941	39227	2	FBgn0085421	21993	35588	Epac	Exchange protein directly activated by cAMP	Epac
chr2R	9634250	9634584	335	7.32	6.67	7.77	-1.1	1.18e-05	0.000368	3.43415	Intron (FBtr0334807/FBgn0033438, intron 1 of 5)	2	9611139	9683858	72720	2	FBgn0033438	49274	35997	Mmp2	Matrix metalloproteinase 2	Mmp2
chr2L	3112769	3113232	464	7.32	6.66	7.78	-1.12	2.94e-05	0.000812	3.09044	Intron (FBtr0077662/FBgn0015600, intron 3 of 10)	1	3068345	3144786	76442	2	FBgn0015600	31554	33526	toc	toucan	toc
chr2L	14387751	14388088	338	6.69	5.87	7.21	-1.34	4.63e-06	0.00018	3.74473	Downstream (2-3kb)	1	14378218	14381172	2955	2	FBgn0020258	-6579	34843	ppk	pickpocket	ppk
chr3L	2629989	2630467	479	8.62	7.99	9.05	-1.05	4.71e-10	1.34e-07	6.8729	Promoter	3	2601455	2630064	28610	2	FBgn0011828	0	38326	Pxn	Peroxidasin	Pxn
chr2R	18988119	18988454	336	6.13	4.9	6.79	-1.88	3.7e-07	2.33e-05	4.63264	Intron (FBtr0340449/FBgn0265356, intron 1 of 7)	2	18987344	19008944	21601	1	FBgn0265356	775	37190	tn	thin	tn
chr3L	13830910	13831373	464	6.4	5.2	7.05	-1.85	2.93e-07	1.91e-05	4.71897	Distal Intergenic	3	13837756	13838080	325	1	FBgn0262813	-6383	12798242	CG43184	uncharacterized protein	CG43184
chr3R	6930425	6930824	400	8.64	8.33	8.9	-0.57	0.00222	0.0247	1.6073	Intron (FBtr0081648/FBgn0260642, intron 1 of 5)	4	6896253	6999228	102976	2	FBgn0260642	68404	40835	Antp	Antennapedia	Antp
chr2R	19584107	19584523	417	7.44	6.85	7.86	-1.02	3.15e-05	0.00085	3.07058	Intron (FBtr0310331/FBgn0003435, intron 3 of 10)	2	19517864	19631508	113645	2	FBgn0003435	46985	37254	sm	smooth	sm
chr2L	12065512	12066155	644	7.79	7.23	8.19	-0.96	3.6e-05	0.000945	3.02457	5' UTR	1	12063457	12066775	3319	2	FBgn0032405	620	34627	firl	firelighter	firl
chr2R	22768454	22768863	410	6.78	6.22	7.18	-0.96	0.000658	0.00958	2.01863	Intron (FBtr0299573/FBgn0259145, intron 2 of 10)	2	22740999	22798289	57291	2	FBgn0259145	29426	37614	CG42260	uncharacterized protein	CG42260
chr3L	18327956	18328430	475	7.08	6.6	7.44	-0.84	0.00256	0.0277	1.55752	Distal Intergenic	3	18323584	18323985	402	2	FBgn0286033	-3971	NA	NA	NA	lncRNA:CR46353
chr3R	10501555	10501896	342	6.49	5.8	6.96	-1.15	0.000431	0.00689	2.16178	Distal Intergenic	4	10513005	10513133	129	2	FBgn0263547	11237	NA	NA	NA	mir-4944
chr2L	11410120	11410453	334	6.25	4.84	6.95	-2.11	1.61e-09	2.93e-07	6.53313	Distal Intergenic	1	11387870	11392320	4451	2	FBgn0263764	-17800	NA	NA	NA	lncRNA:CR43681
chr2R	9382570	9383689	1120	9.15	8.91	9.35	-0.44	0.0048	0.0452	1.34486	Intron (FBtr0332997/FBgn0033405, intron 1 of 7)	2	9309296	9389467	80172	2	FBgn0033405	5778	35959	CG13954	uncharacterized protein	CG13954
chr2R	15409424	15409951	528	7.23	6.64	7.65	-1.01	5.58e-05	0.00131	2.88273	5' UTR	2	15401096	15471884	70789	1	FBgn0263980	8328	5740318	Stacl	Stac-like	Stacl
chr3L	18057061	18057411	351	7.86	7.46	8.17	-0.7	0.00292	0.0308	1.51145	Intron (FBtr0306814/FBgn0000568, intron 3 of 7)	3	17950953	18064696	113744	2	FBgn0000568	7285	39999	Eip75B	Ecdysone-induced protein 75B	Eip75B
chr3L	14298683	14298948	266	6.87	6.35	7.25	-0.89	0.00285	0.0302	1.51999	Intron (FBtr0075743/FBgn0001085, intron 1 of 4)	3	14274343	14368639	94297	1	FBgn0001085	24340	45307	fz	frizzled	fz
chr2L	14546683	14547212	530	6.97	6.38	7.39	-1.01	0.000255	0.00451	2.34582	Downstream (<1kb)	1	14547498	14549109	1612	2	FBgn0250844	1897	34848	CG4218	uncharacterized protein	CG4218
chr2R	10291466	10292224	759	7.07	6.23	7.6	-1.37	9.79e-07	5.08e-05	4.29414	Intron (FBtr0088338/FBgn0033504, intron 3 of 13)	2	10269016	10307024	38009	1	FBgn0033504	22450	36084	CAP	CAP	CAP
chr3L	15356495	15356819	325	6.99	6.49	7.35	-0.86	0.002	0.0228	1.64207	Distal Intergenic	3	15336692	15344315	7624	1	FBgn0036494	19803	39663	Toll-6	Toll-6	Toll-6
chr3L	17983870	17984441	572	7.75	7.33	8.07	-0.75	0.001	0.0134	1.8729	Intron (FBtr0306814/FBgn0000568, intron 4 of 7)	3	17950953	18064696	113744	2	FBgn0000568	80255	39999	Eip75B	Ecdysone-induced protein 75B	Eip75B
chr3L	3451716	3452989	1274	8.39	8.07	8.66	-0.59	0.00104	0.0137	1.86328	Intron (FBtr0309837/FBgn0026259, intron 4 of 7)	3	3428658	3460977	32320	2	FBgn0026259	7988	44261	eIF5B	eukaryotic translation initiation factor 5B	eIF5B
chrX	3326947	3327459	513	6.98	6.52	7.33	-0.81	0.00468	0.0444	1.35262	Intron (FBtr0070509/FBgn0000479, intron 6 of 14)	6	3176440	3343767	167328	1	FBgn0000479	150507	31309	dnc	dunce	dnc
chr3L	18969189	18969485	297	7.01	6.44	7.41	-0.97	0.000857	0.0118	1.92812	Distal Intergenic	3	18979368	18979590	223	1	FBgn0267249	-9883	NA	NA	NA	lncRNA:CR45689
chr3L	19346668	19347517	850	7.37	6.69	7.83	-1.14	3.03e-06	0.000129	3.88941	Intron (FBtr0089796/FBgn0052206, intron 12 of 13)	3	19340321	19412912	72592	2	FBgn0052206	65395	40105	CG32206	uncharacterized protein	CG32206
chr3L	11347576	11347903	328	6.05	5.27	6.55	-1.29	0.000361	0.00595	2.22548	Downstream (1-2kb)	3	11349395	11349743	349	2	FBgn0266786	1840	NA	NA	NA	lncRNA:CR45251
chr2L	12593760	12594622	863	9.9	9.56	10.18	-0.62	5.33e-06	0.000201	3.6968	5' UTR	1	12587625	12628135	40511	1	FBgn0085424	6135	34669	nub	nubbin	nub
chr3R	12854649	12855183	535	8.02	7.31	8.5	-1.19	9.11e-09	1.15e-06	5.9393	Downstream (<1kb)	4	12850380	12850668	289	2	FBgn0265165	-3981	NA	NA	NA	lncRNA:CR44234
chr2R	22263918	22264682	765	8.45	7.85	8.88	-1.03	1.14e-07	8.71e-06	5.05998	Intron (FBtr0071775/FBgn0020307, intron 2 of 5)	2	22243963	22286469	42507	1	FBgn0020307	19955	37546	dve	defective proventriculus	dve
chr3R	12812086	12812814	729	8.15	7.59	8.55	-0.96	9.44e-07	5.01e-05	4.30016	Intron (FBtr0082689/FBgn0051345, intron 2 of 4)	4	12811145	12817029	5885	2	FBgn0051345	4215	41576	CG31345	uncharacterized protein	CG31345
chr2L	11868916	11869235	320	6.95	6.35	7.37	-1.01	0.000241	0.00431	2.36552	Intron (FBtr0334140/FBgn0264815, intron 3 of 9)	1	11814156	11928572	114417	2	FBgn0264815	59337	34594	Pde1c	Phosphodiesterase 1c	Pde1c
chr2R	15888583	15889357	775	7.8	7.23	8.2	-0.97	3.08e-05	0.000838	3.07676	Intron (FBtr0330732/FBgn0264089, intron 2 of 19)	2	15869495	15922118	52624	2	FBgn0264089	32761	36746	sli	slit	sli
chr3R	31004610	31005100	491	7.57	6.81	8.07	-1.26	9.84e-08	7.75e-06	5.1107	Intron (FBtr0334508/FBgn0004573, intron 1 of 2)	4	30968236	31016875	48640	2	FBgn0004573	11775	43669	5-HT7	5-hydroxytryptamine (serotonin) receptor 7	5-HT7
chr3L	13613660	13614455	796	8.42	8.12	8.66	-0.54	0.00477	0.045	1.34679	Intron (FBtr0330351/FBgn0264001, intron 3 of 12)	3	13521907	13803400	281494	2	FBgn0264001	188945	39527	bru3	bruno 3	bru3
chr3R	28306698	28307762	1065	7.76	7.22	8.16	-0.94	8.7e-06	0.000288	3.54061	Distal Intergenic	4	28303631	28304605	975	2	FBgn0039577	-2093	43370	CG12516	uncharacterized protein	CG12516
chr3L	21364174	21364698	525	7.41	6.91	7.78	-0.87	0.00035	0.00583	2.23433	Distal Intergenic	3	21360179	21361229	1051	1	FBgn0052440	3995	318030	CG32440	uncharacterized protein	CG32440
chr3R	6295853	6296395	543	7.34	6.84	7.71	-0.87	0.000956	0.0129	1.88941	Distal Intergenic	4	6299128	6300738	1611	1	FBgn0040279	-2733	40770	Osi14	Osiris 14	Osi14
chr3R	21612900	21613629	730	8.3	7.64	8.75	-1.11	1.04e-07	8.05e-06	5.0942	Intron (FBtr0084121/FBgn0283499, intron 1 of 12)	4	21570248	21619321	49074	2	FBgn0283499	5692	42549	InR	Insulin-like receptor	InR
chr2R	10942331	10943099	769	8.14	7.6	8.54	-0.94	3.15e-05	0.00085	3.07058	Distal Intergenic	2	10938425	10941738	3314	2	FBgn0033574	-593	36163	Spn47C	Serpin 47C	Spn47C
chr3L	2614517	2614835	319	7.64	7.21	7.97	-0.76	0.00071	0.0101	1.99568	Intron (FBtr0072954/FBgn0011828, intron 1 of 8)	3	2601455	2630064	28610	2	FBgn0011828	15229	38326	Pxn	Peroxidasin	Pxn
chrX	20704968	20705441	474	8.05	7.66	8.35	-0.69	0.000432	0.00689	2.16178	Distal Intergenic	6	20690670	20697321	6652	1	FBgn0003300	14298	33059	run	runt	run
chrX	14414991	14415401	411	6.61	5.72	7.16	-1.44	1.72e-06	7.96e-05	4.09909	Intron (FBtr0073913/FBgn0052600, intron 5 of 9)	6	14322226	14462351	140126	1	FBgn0052600	92765	32387	dpr8	defective proboscis extension response 8	dpr8
chr2R	16477974	16478588	615	7.63	7.2	7.96	-0.76	0.00077	0.0108	1.96658	Distal Intergenic	2	16484841	16485552	712	2	FBgn0034131	6964	36843	CG15712	uncharacterized protein	CG15712
chr3R	10272584	10273263	680	7.66	7.28	7.96	-0.68	0.00224	0.025	1.60206	Intron (FBtr0305354/FBgn0262617, intron 1 of 12)	4	10264306	10308467	44162	1	FBgn0262617	8278	41256	Nuak1	Nuak1 ortholog	Nuak1
chr3R	18520103	18520733	631	7.34	6.22	7.97	-1.75	1.43e-12	8.99e-10	9.04624	Intron (FBtr0083644/FBgn0004652, intron 1 of 7)	4	18414273	18545586	131314	2	FBgn0004652	24853	42226	fru	fruitless	fru
chr2R	6858354	6859119	766	7.62	7.22	7.94	-0.71	0.00128	0.016	1.79588	Downstream (2-3kb)	2	6862001	6872718	10718	2	FBgn0265935	13599	35596	coro	coro	coro
chr2R	19207079	19207456	378	6.74	6.11	7.18	-1.06	0.000203	0.00378	2.42251	Intron (FBtr0086503/FBgn0263395, intron 2 of 14)	2	19178738	19227193	48456	1	FBgn0263395	28341	37203	hppy	happyhour	hppy
chr2L	10926519	10926895	377	7.27	6.62	7.72	-1.1	9.08e-06	0.000296	3.52871	Intron (FBtr0340553/FBgn0261871, intron 2 of 7)	1	10917015	10964153	47139	2	FBgn0261871	37258	3346227	dpr2	defective proboscis extension response 2	dpr2
chr2R	10918184	10918908	725	9.38	9.06	9.64	-0.58	0.000168	0.00327	2.48545	Distal Intergenic	2	10909923	10910485	563	1	FBgn0033573	8261	36162	Obp47a	Odorant-binding protein 47a	Obp47a
chr3R	19575184	19575430	247	6.23	5.43	6.74	-1.31	0.000171	0.00331	2.48017	Intron (FBtr0110917/FBgn0260003, intron 25 of 33)	4	19461085	19597288	136204	1	FBgn0260003	114099	42327	Dys	Dystrophin	Dys
chr3R	6530728	6531155	428	6.63	5.71	7.19	-1.48	1.87e-06	8.49e-05	4.07109	3' UTR	4	6529169	6593330	64162	2	FBgn0053202	62175	40800	dpr11	defective proboscis extension response 11	dpr11
chr3L	22997947	22999183	1237	9.25	9.01	9.46	-0.45	0.00188	0.0218	1.66154	Promoter	3	22998372	23040300	41929	1	FBgn0262509	0	40515	nrm	neuromusculin	nrm
chr2R	19049992	19050912	921	8.12	7.59	8.5	-0.91	5.25e-06	0.000199	3.70115	Distal Intergenic	2	19055231	19055924	694	2	FBgn0034415	5012	37194	CG15116	uncharacterized protein	CG15116
chr3R	24433637	24434046	410	7.53	6.98	7.93	-0.95	0.000155	0.00304	2.51713	Intron (FBtr0334916/FBgn0000036, intron 2 of 9)	4	24393896	24457157	63262	2	FBgn0000036	23111	42918	nAChRalpha1	nicotinic Acetylcholine Receptor alpha1	nAChRalpha1
chr2R	10702645	10703227	583	7.54	7.16	7.85	-0.69	0.00189	0.0218	1.66154	Intron (FBtr0304900/FBgn0024836, intron 2 of 5)	2	10673345	10721138	47794	1	FBgn0024836	29300	36125	stan	starry night	stan
chr2R	9056451	9057227	777	8.88	8.55	9.14	-0.59	0.000873	0.012	1.92082	Exon (FBtr0088662/FBgn0033368, exon 3 of 11)	2	9044850	9060608	15759	2	FBgn0033368	3381	35911	CG13743	uncharacterized protein	CG13743
chr2L	5787203	5787454	252	6.65	5.93	7.12	-1.19	7.2e-05	0.0016	2.79588	Intron (FBtr0301235/FBgn0031738, intron 3 of 7)	1	5767002	5800253	33252	2	FBgn0031738	12799	33807	CG9171	uncharacterized protein	CG9171
chr2L	11551024	11551669	646	7.38	6.63	7.86	-1.24	7.16e-07	4e-05	4.39794	Distal Intergenic	1	11548640	11550035	1396	2	FBgn0265687	-989	NA	NA	NA	lncRNA:CR44494
chr3L	10549958	10550563	606	8.13	7.51	8.56	-1.06	5.12e-08	4.51e-06	5.34582	Intron (FBtr0305097/FBgn0052062, intron 2 of 13)	3	10481412	10594012	112601	1	FBgn0052062	68546	39198	Rbfox1	RNA-binding Fox protein 1	Rbfox1
chr2R	16549177	16549392	216	7.34	6.56	7.84	-1.27	5.84e-07	3.36e-05	4.47366	Distal Intergenic	2	16552258	16558486	6229	1	FBgn0034135	-2866	36848	Syn2	Syntrophin-like 2	Syn2
chr2L	14128317	14128864	548	7.74	7.11	8.17	-1.06	6.21e-07	3.55e-05	4.44977	Intron (FBtr0445730/FBgn0283651, intron 4 of 7)	1	14104090	14160587	56498	1	FBgn0283651	24227	34829	CG46301	uncharacterized protein	CG46301
chr2L	2334845	2335273	429	7.24	6.61	7.67	-1.06	2.15e-05	0.000629	3.20135	Intron (FBtr0344662/FBgn0031414, intron 3 of 13)	1	2308761	2357356	48596	2	FBgn0031413	22083	33414	CG9967	uncharacterized protein	CG9967
chrX	15245790	15246472	683	7.69	7.29	8	-0.71	0.00128	0.016	1.79588	Distal Intergenic	6	15243859	15244913	1055	2	FBgn0030623	-877	32453	PPYR1	Protein phosphatase Y regulator 1	PPYR1
